# Supplementary material for: Briarane Diterpenoids from the Gorgonian Dichotella gemmacea
Source: MDPI journal article supplement (doi:10.3390/md12126178), 2014-12-18

# Supplementary Information

## Index

|   |                                                                           |                 |
|---|---------------------------------------------------------------------------|-----------------|
| 1 | Spectra of the new compound <b>1</b>                                      | Figures S1–S8   |
|   | HR-ESIMS spectrum of the new compound <b>1</b>                            | Figure S1       |
|   | <sup>1</sup> H NMR spectrum of the new compound <b>1</b>                  | Figure S2       |
|   | <sup>13</sup> C NMR spectrum of the new compound <b>1</b>                 | Figure S3       |
|   | DEPT spectrum of the new compound <b>1</b>                                | Figure S4       |
|   | HSQC spectrum of the new compound <b>1</b>                                | Figure S5       |
|   | <sup>1</sup> H- <sup>1</sup> H COSY spectrum of the new compound <b>1</b> | Figure S6       |
|   | HMBC spectrum of the new compound <b>1</b>                                | Figure S7       |
|   | NOESY spectrum of the new compound <b>1</b>                               | Figure S8       |
| 2 | Spectra of the new compound <b>2</b>                                      | Figures S9–S15  |
|   | HR-ESIMS spectrum of the new compound <b>2</b>                            | Figure S9       |
|   | <sup>1</sup> H NMR spectrum of the new compound <b>2</b>                  | Figure S10      |
|   | <sup>13</sup> C NMR spectrum of the new compound <b>2</b>                 | Figure S11      |
|   | DEPT spectrum of the new compound <b>2</b>                                | Figure S12      |
|   | HSQC spectrum of the new compound <b>2</b>                                | Figure S13      |
|   | HMBC spectrum of the new compound <b>2</b>                                | Figure S14      |
|   | NOESY spectrum of the new compound <b>2</b>                               | Figure S15      |
| 3 | Spectra of the new compound <b>3</b>                                      | Figures S16–S23 |
|   | HR-ESIMS spectrum of the new compound <b>3</b>                            | Figure S16      |
|   | <sup>1</sup> H NMR spectrum of the new compound <b>3</b>                  | Figure S17      |
|   | <sup>13</sup> C NMR spectrum of the new compound <b>3</b>                 | Figure S18      |
|   | DEPT spectrum of the new compound <b>3</b>                                | Figure S19      |
|   | HSQC spectrum of the new compound <b>3</b>                                | Figure S20      |
|   | <sup>1</sup> H- <sup>1</sup> H COSY spectrum of the new compound <b>3</b> | Figure S21      |
|   | HMBC spectrum of the new compound <b>3</b>                                | Figure S22      |
|   | NOESY spectrum of the new compound <b>3</b>                               | Figure S23      |
| 4 | Spectra of the new compound <b>4</b>                                      | Figures S24–S31 |
|   | HR-ESIMS spectrum of the new compound <b>4</b>                            | Figure S24      |
|   | <sup>1</sup> H NMR spectrum of the new compound <b>4</b>                  | Figure S25      |
|   | <sup>13</sup> C NMR spectrum of the new compound <b>4</b>                 | Figure S26      |
|   | DEPT spectrum of the new compound <b>4</b>                                | Figure S27      |
|   | HSQC spectrum of the new compound <b>4</b>                                | Figure S28      |
|   | <sup>1</sup> H- <sup>1</sup> H COSY spectrum of the new compound <b>4</b> | Figure S29      |
|   | HMBC spectrum of the new compound <b>4</b>                                | Figure S30      |
|   | NOESY spectrum of the new compound <b>4</b>                               | Figure S31      |
| 5 | Spectra of the new compound <b>5</b>                                      | Figures S32–S39 |
|   | HR-ESIMS spectrum of the new compound <b>5</b>                            | Figure S32      |
|   | <sup>1</sup> H NMR spectrum of the new compound <b>5</b>                  | Figure S33      |
|   | <sup>13</sup> C NMR spectrum of the new compound <b>5</b>                 | Figure S34      |
|   | DEPT spectrum of the new compound <b>5</b>                                | Figure S35      |
|   | HSQC spectrum of the new compound <b>5</b>                                | Figure S36      |
|   | <sup>1</sup> H- <sup>1</sup> H COSY spectrum of the new compound <b>5</b> | Figure S37      |
|   | HMBC spectrum of the new compound <b>5</b>                                | Figure S38      |
|   | NOESY spectrum of the new compound <b>5</b>                               | Figure S39      |

|   |                                                                           |                 |
|---|---------------------------------------------------------------------------|-----------------|
| 6 | Spectra of the new compound <b>6</b>                                      | Figures S40–S47 |
|   | HR-ESIMS spectrum of the new compound <b>6</b>                            | Figure S40      |
|   | <sup>1</sup> H NMR spectrum of the new compound <b>6</b>                  | Figure S41      |
|   | <sup>13</sup> C NMR spectrum of the new compound <b>6</b>                 | Figure S42      |
|   | DEPT spectrum of the new compound <b>6</b>                                | Figure S43      |
|   | HSQC spectrum of the new compound <b>6</b>                                | Figure S44      |
|   | <sup>1</sup> H- <sup>1</sup> H COSY spectrum of the new compound <b>6</b> | Figure S45      |
|   | HMBC spectrum of the new compound <b>6</b>                                | Figure S46      |
|   | NOESY spectrum of the new compound <b>6</b>                               | Figure S47      |
| 7 | Spectra of the new compound <b>7</b>                                      | Figures S48–S53 |
|   | HR-ESIMS spectrum of the new compound <b>7</b>                            | Figure S48      |
|   | <sup>1</sup> H NMR spectrum of the new compound <b>7</b>                  | Figure S49      |
|   | <sup>13</sup> C NMR spectrum of the new compound <b>7</b>                 | Figure S50      |
|   | DEPT spectrum of the new compound <b>7</b>                                | Figure S51      |
|   | HSQC spectrum of the new compound <b>7</b>                                | Figure S52      |
|   | <sup>1</sup> H- <sup>1</sup> H COSY spectrum of the new compound <b>6</b> | Figure S53      |
|   | HMBC spectrum of the new compound <b>6</b>                                | Figure S54      |
|   | NOESY spectrum of the new compound <b>7</b>                               | Figure S55      |

**Figure S1.** HR-ESIMS spectrum of the new compound 1.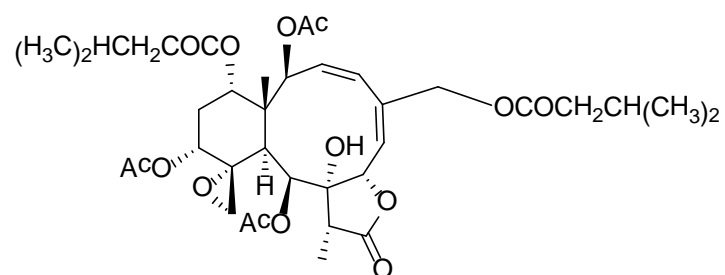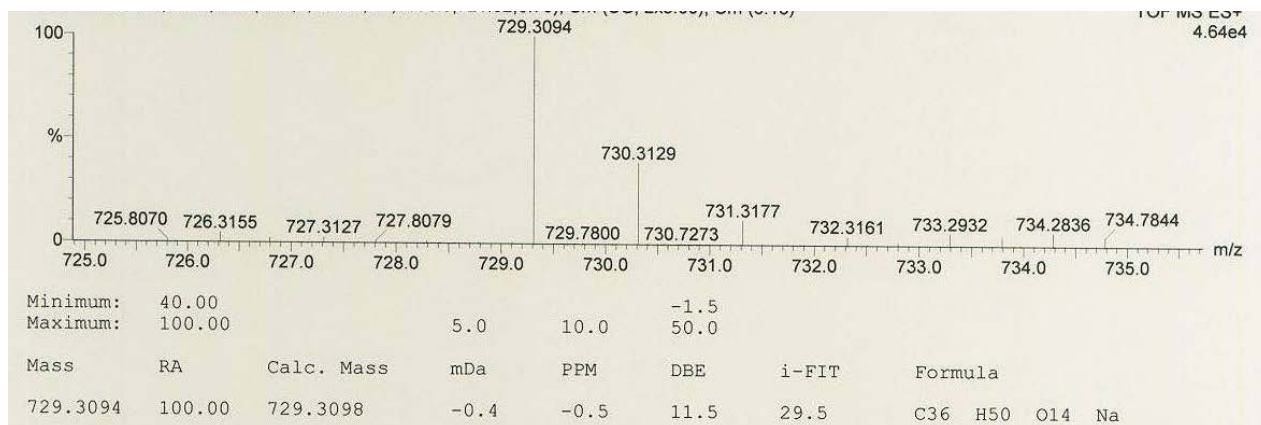

**Figure S2.**  $^1\text{H}$  NMR spectrum of the new compound **1**.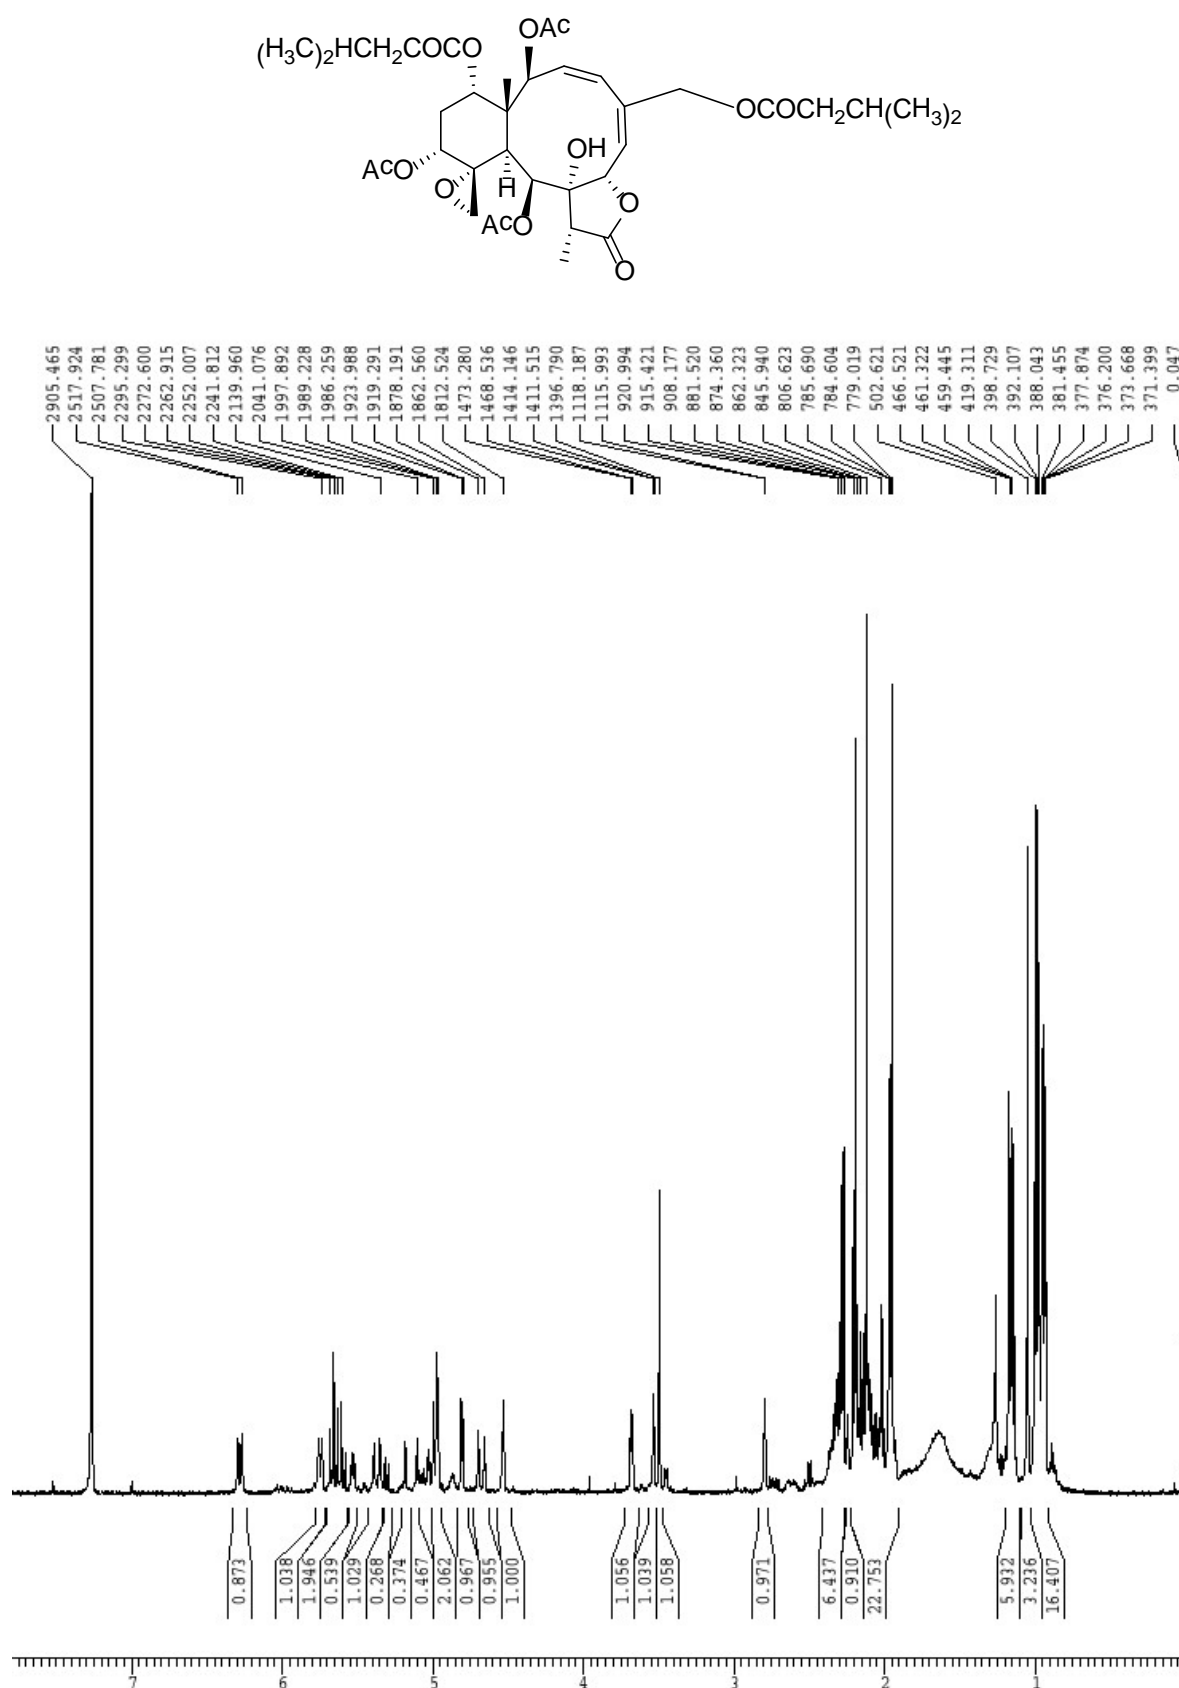

**Figure S3.**  $^{13}\text{C}$  NMR spectrum of the new compound **1**.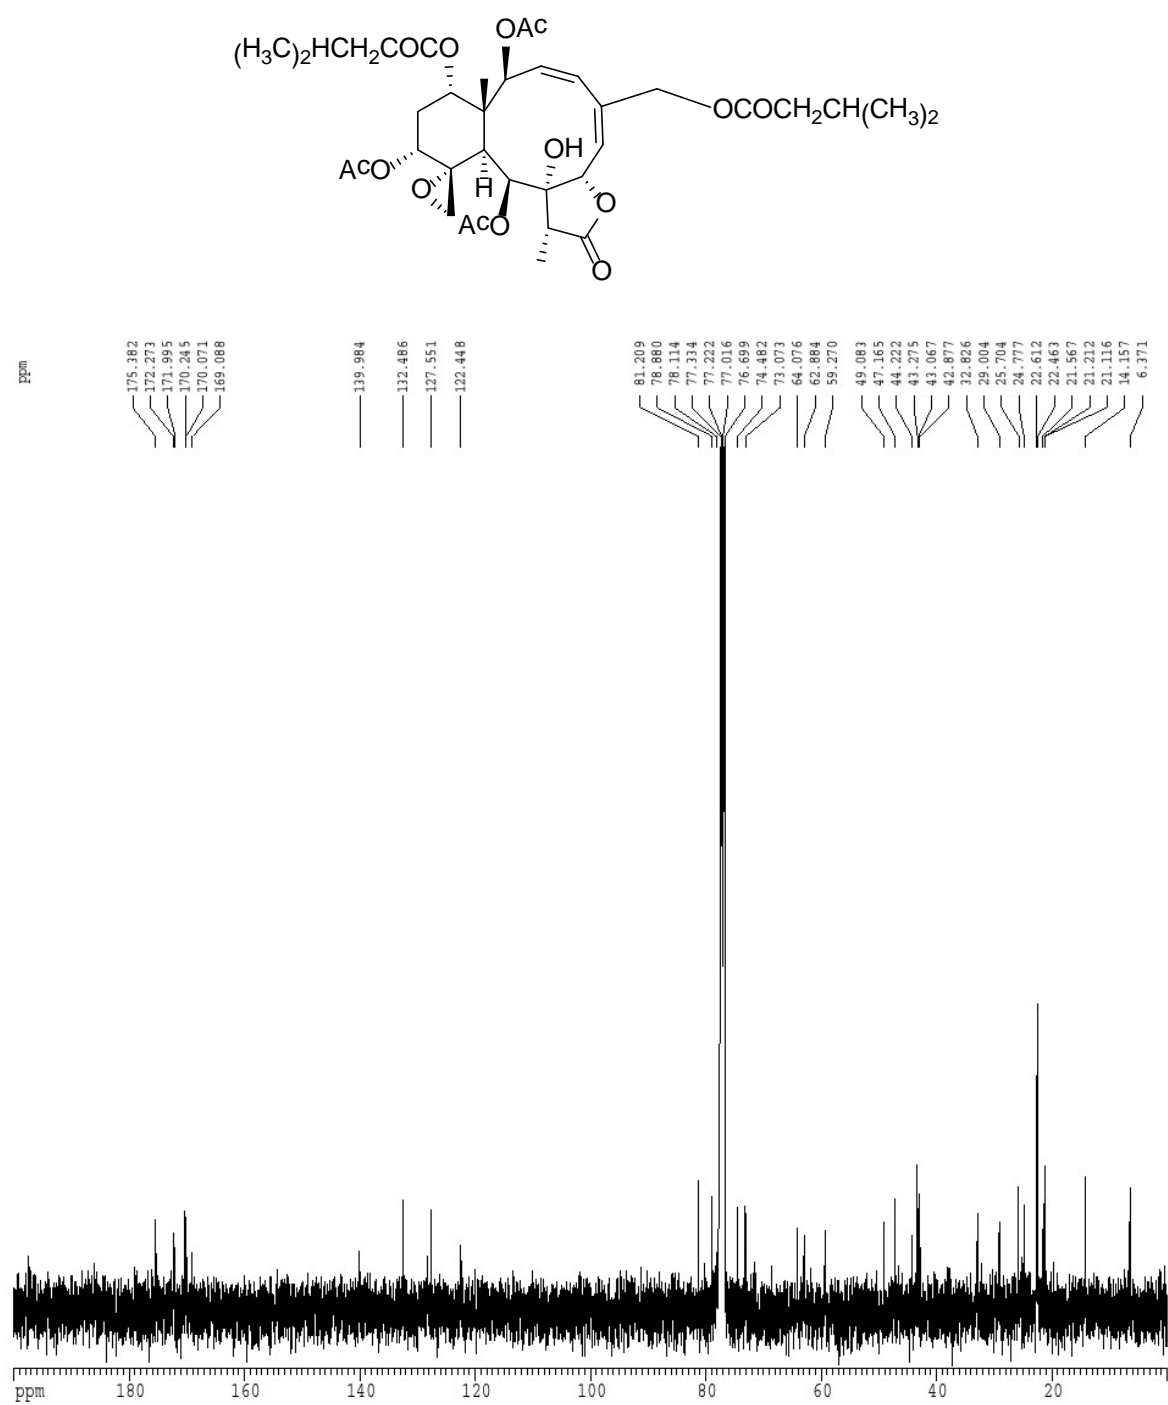

**Figure S4.** DEPT spectrum of the new compound **1**.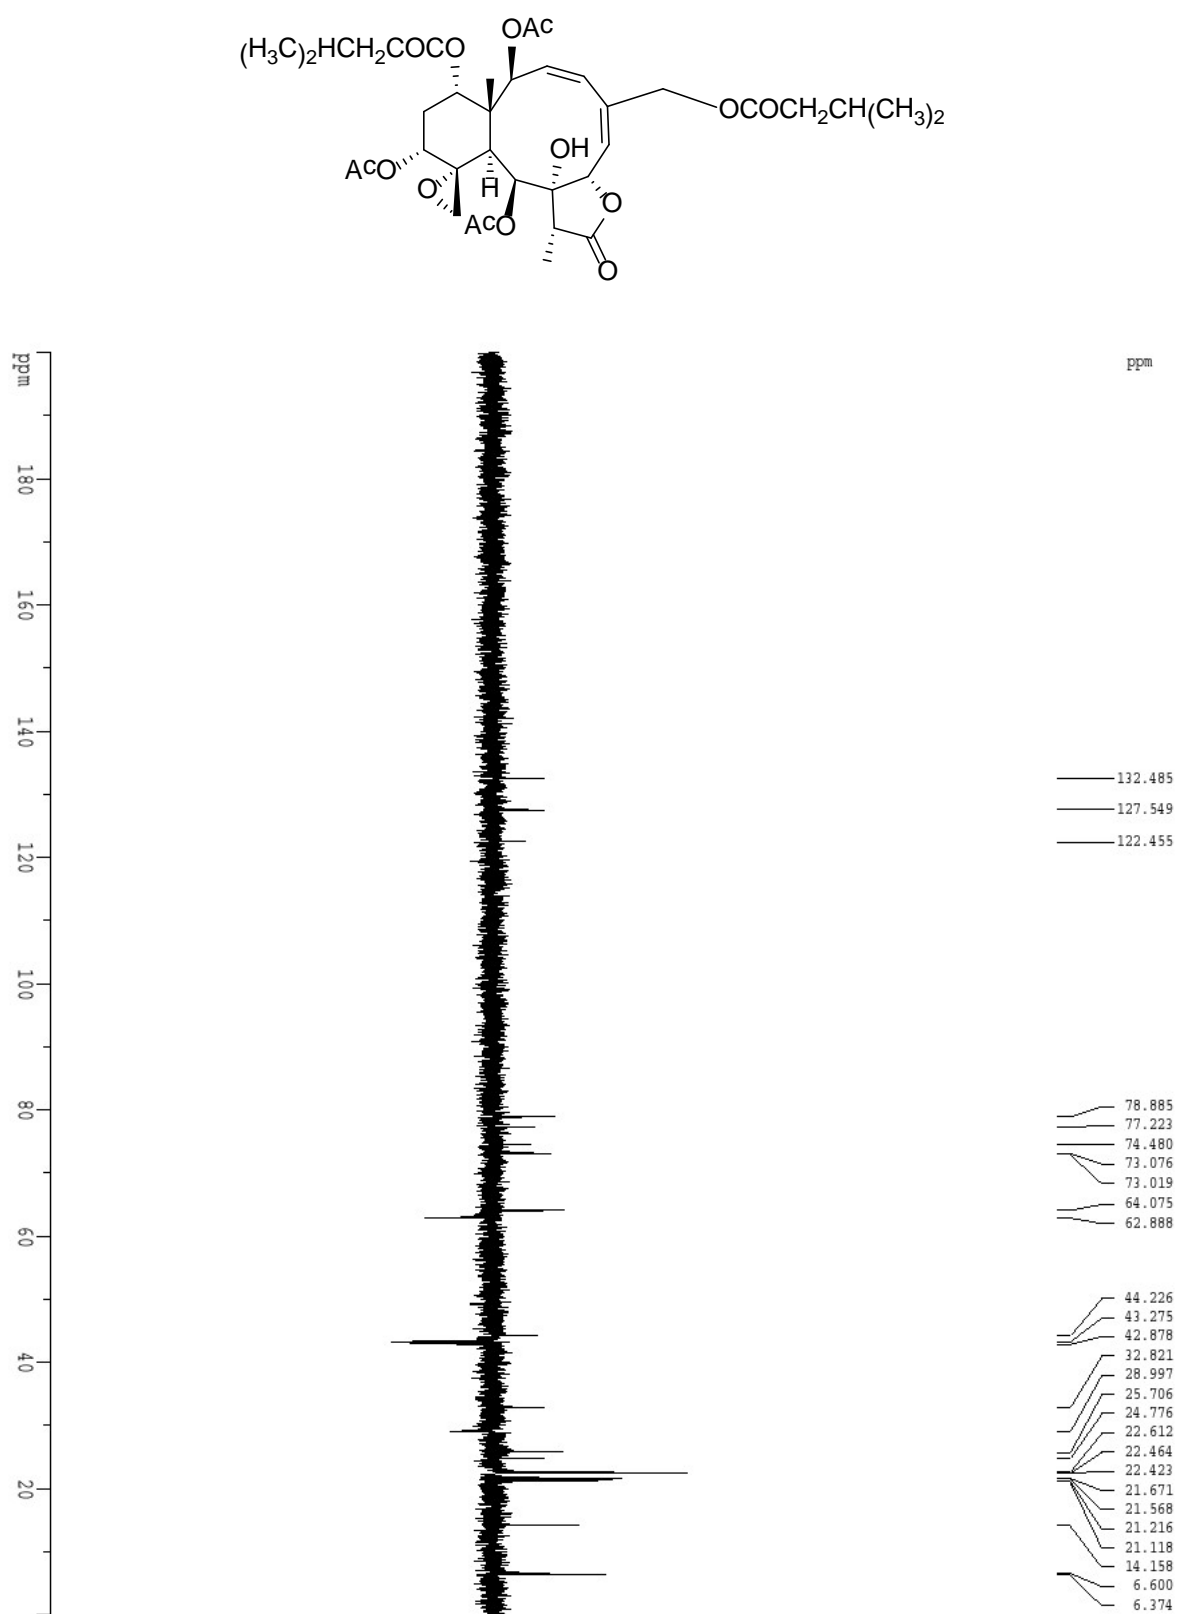

**Figure S5.** HSQC spectrum of the new compound **1**.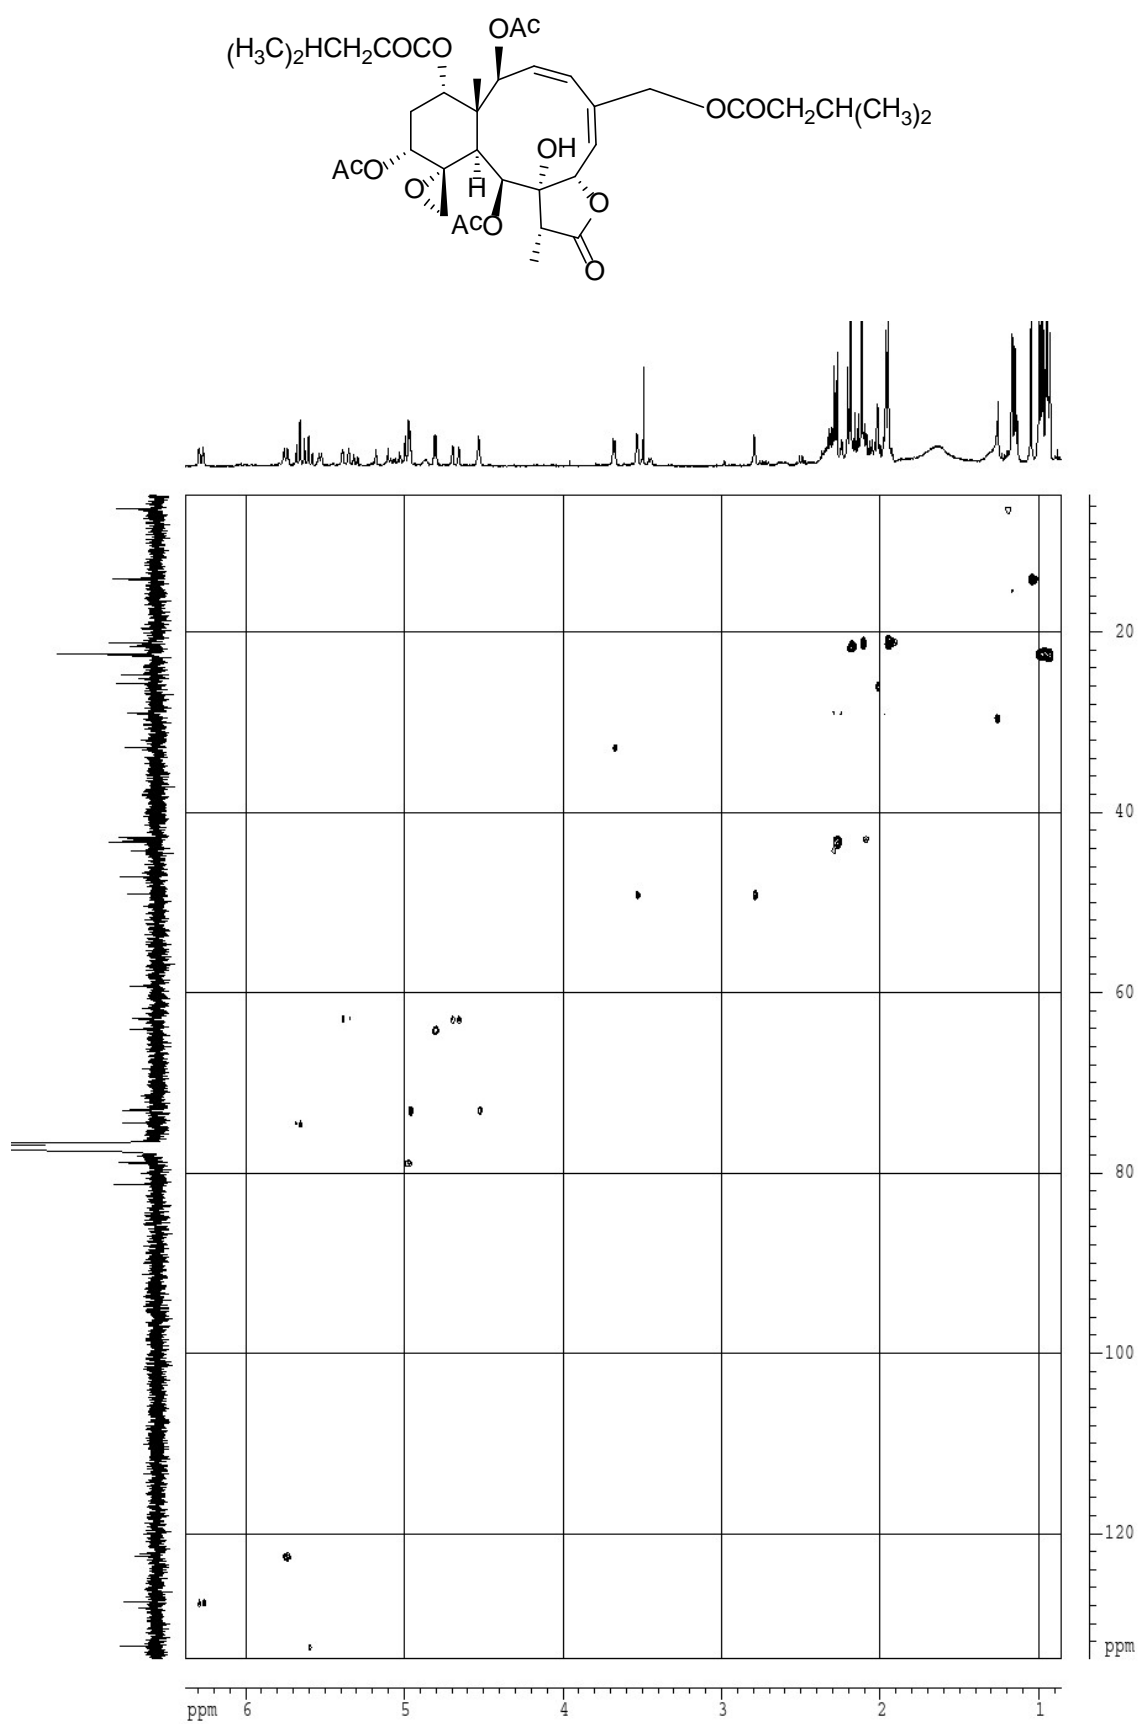

**Figure S6.**  $^1\text{H}$ - $^1\text{H}$  COSY spectrum of the new compound **1**.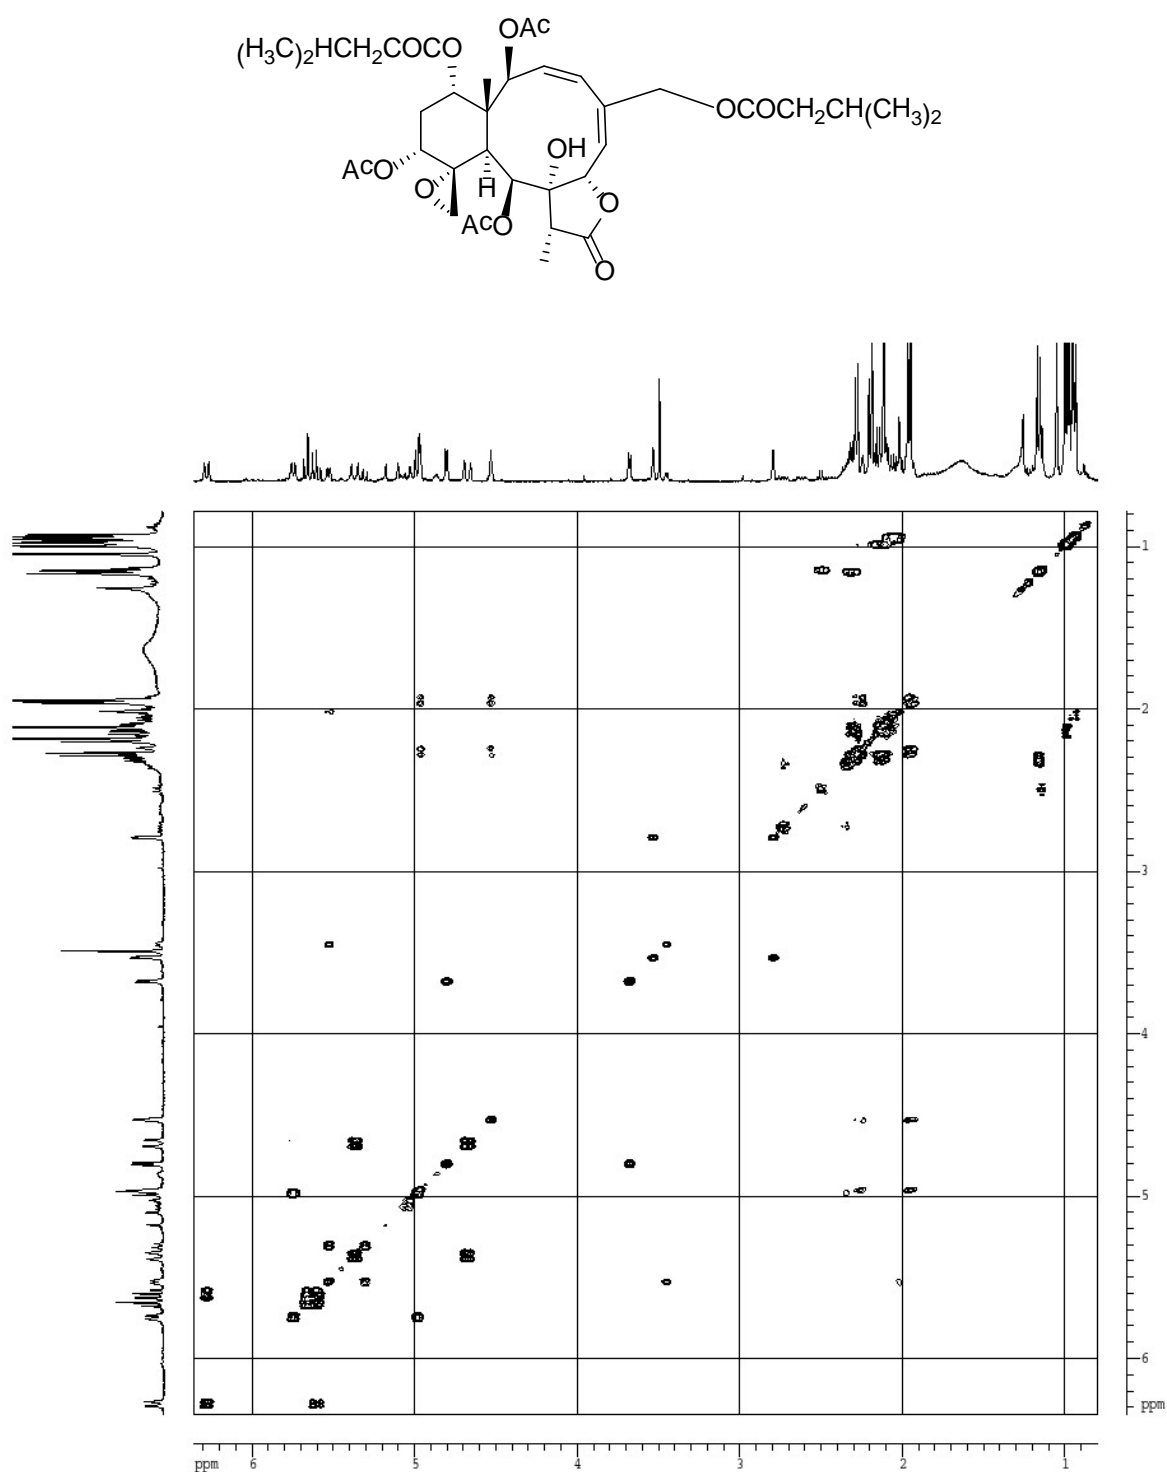



**Figure S7.** HMBC spectrum of the new compound **1**.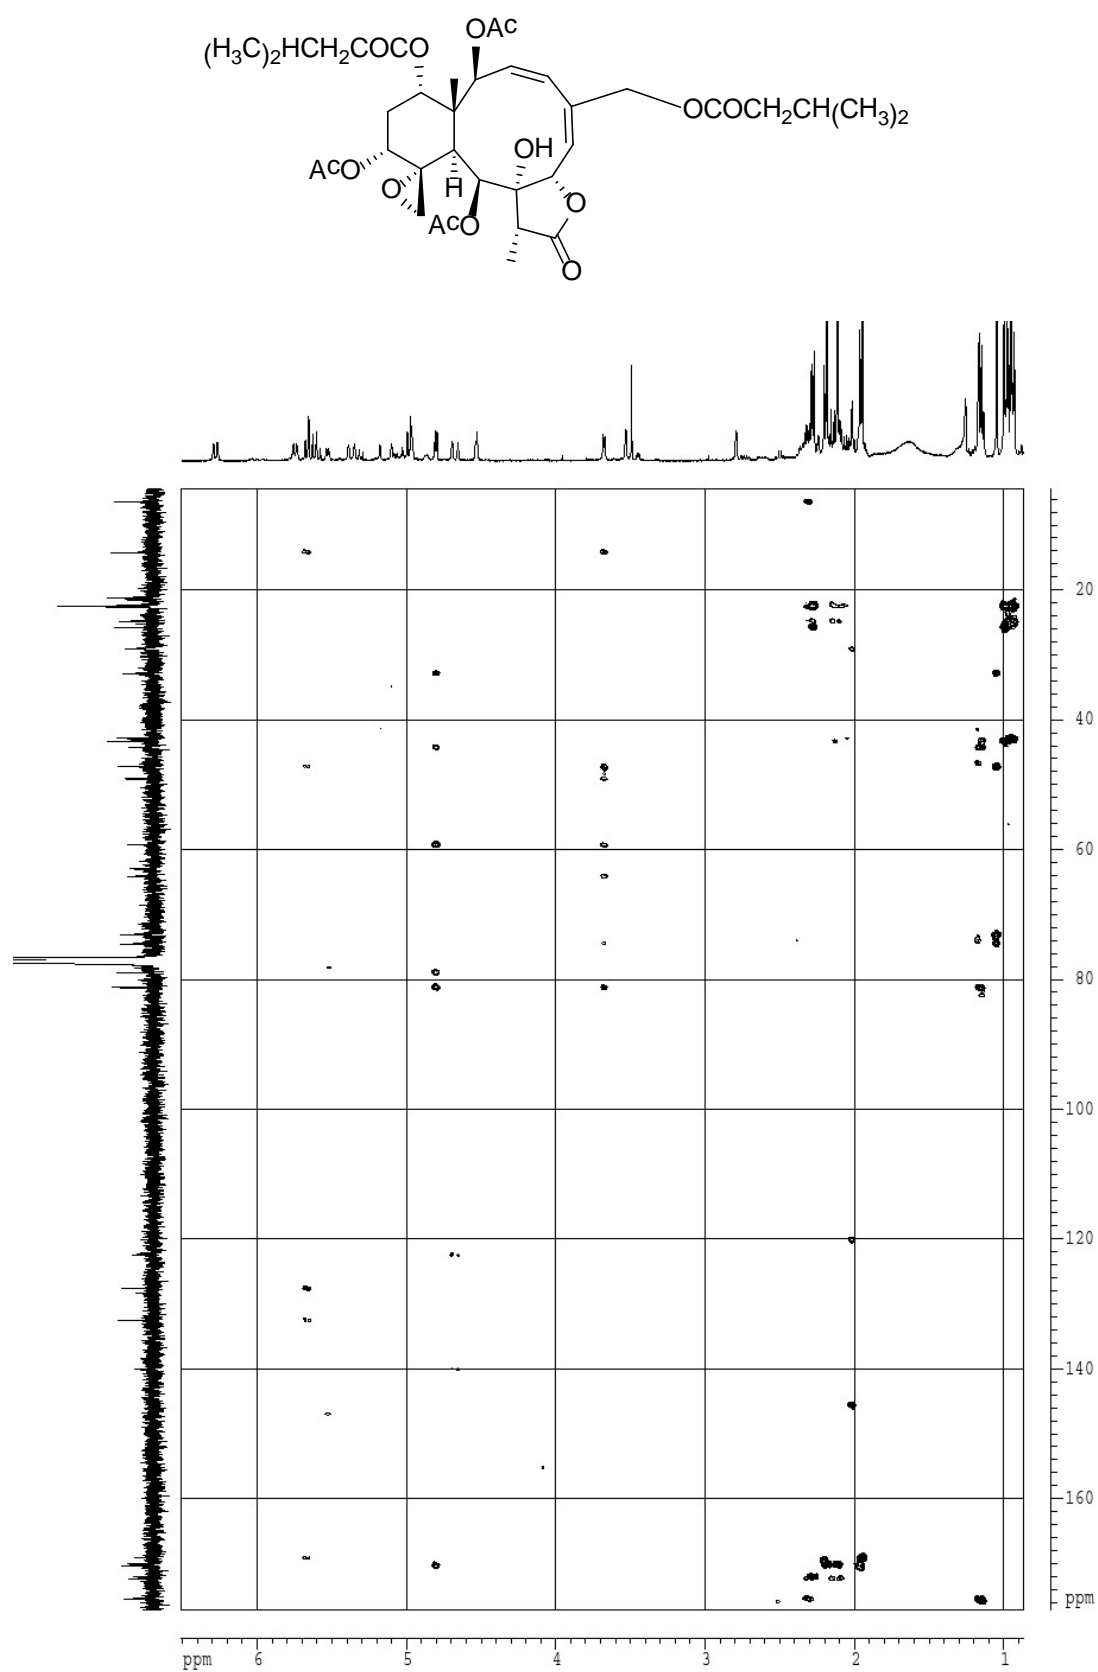

**Figure S8.** NOESY spectrum of the new compound **1**.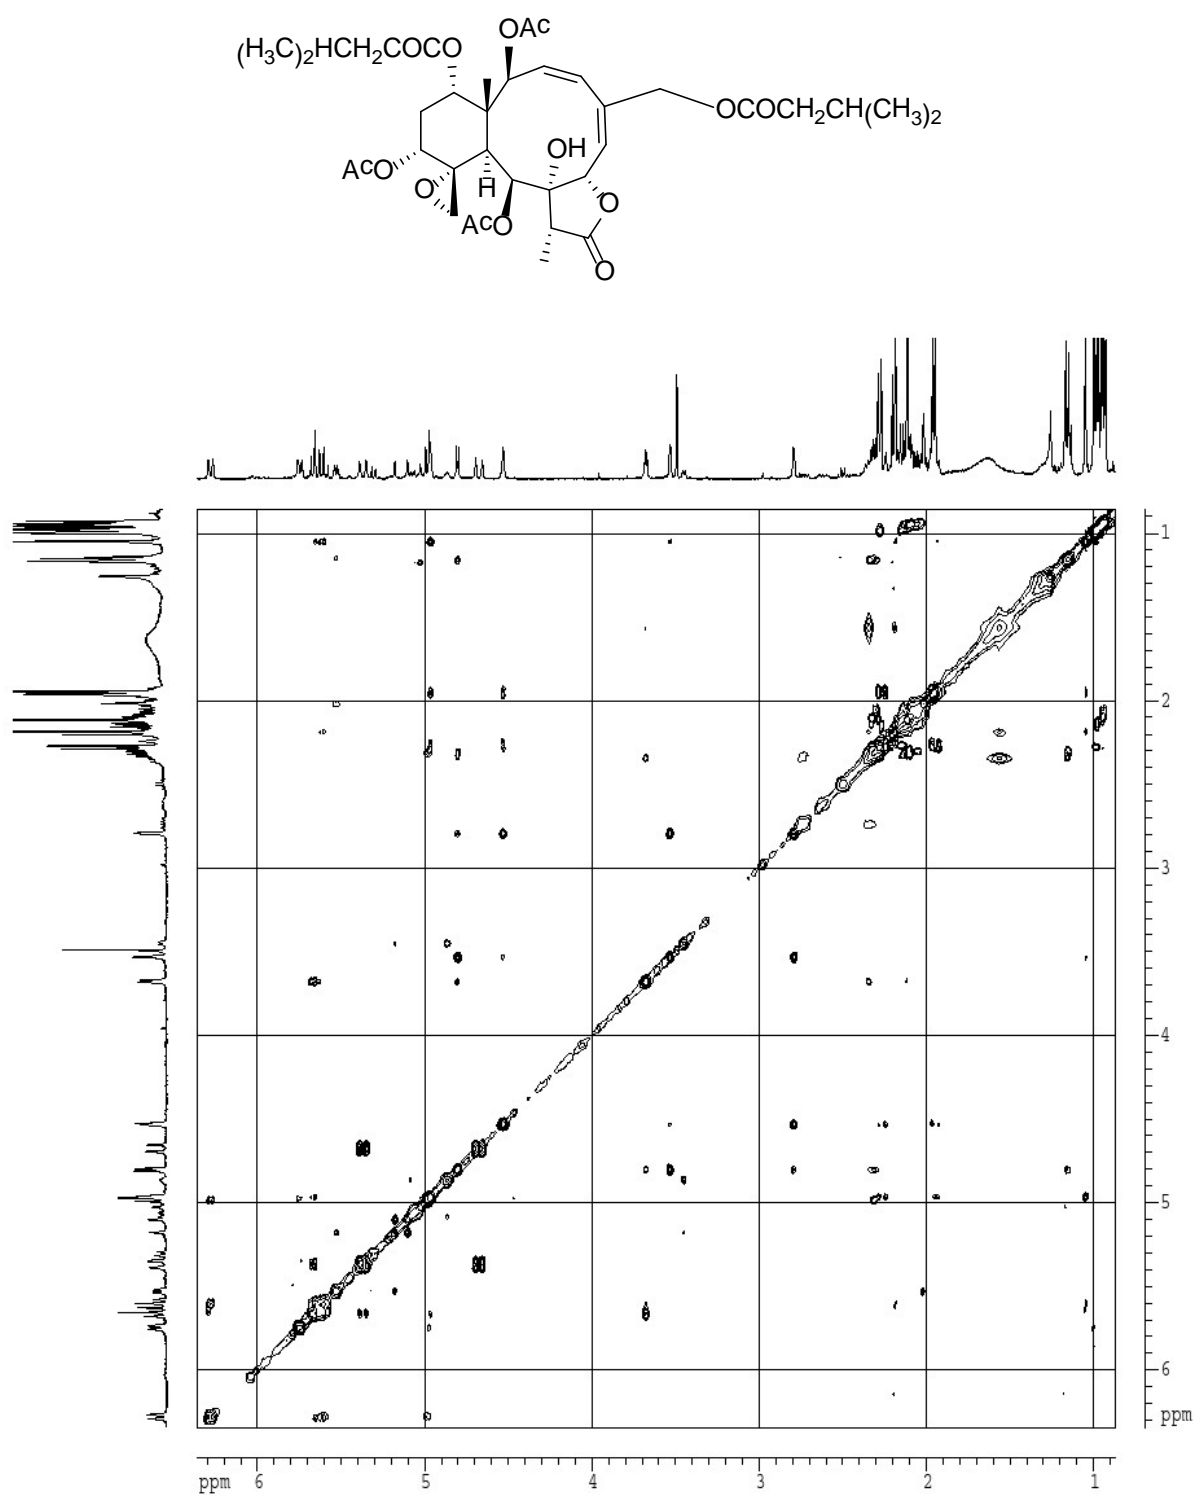

**Figure S9.** HR-ESIMS spectrum of the new compound 2.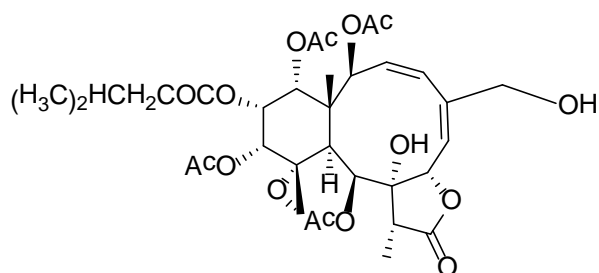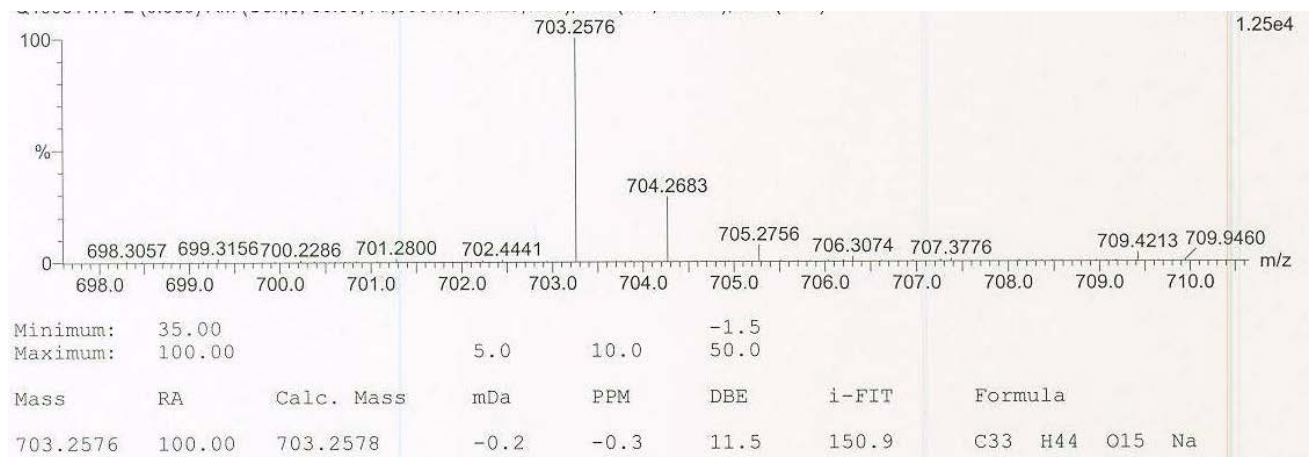

**Figure S10.**  $^1\text{H}$  NMR spectrum of the new compound 2.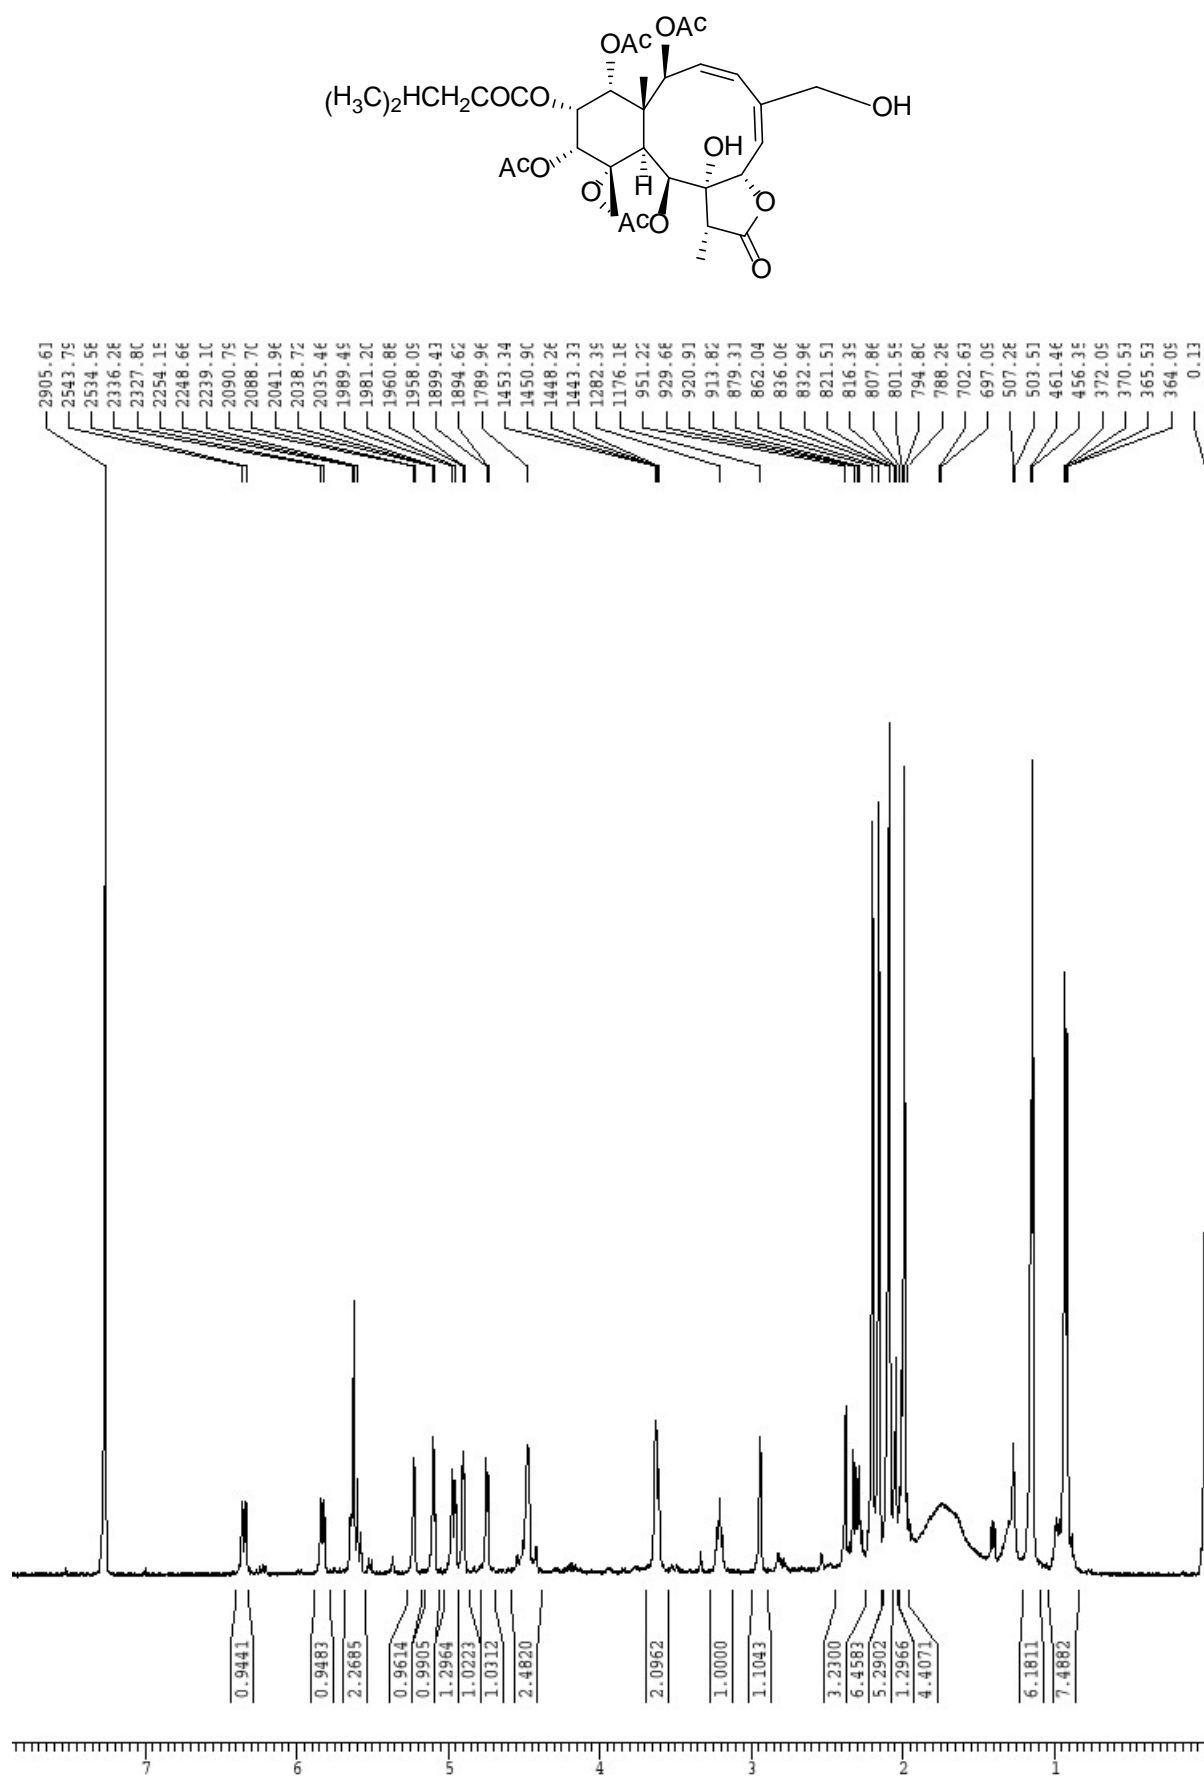

**Figure S11.**  $^{13}\text{C}$  NMR spectrum of the new compound 2.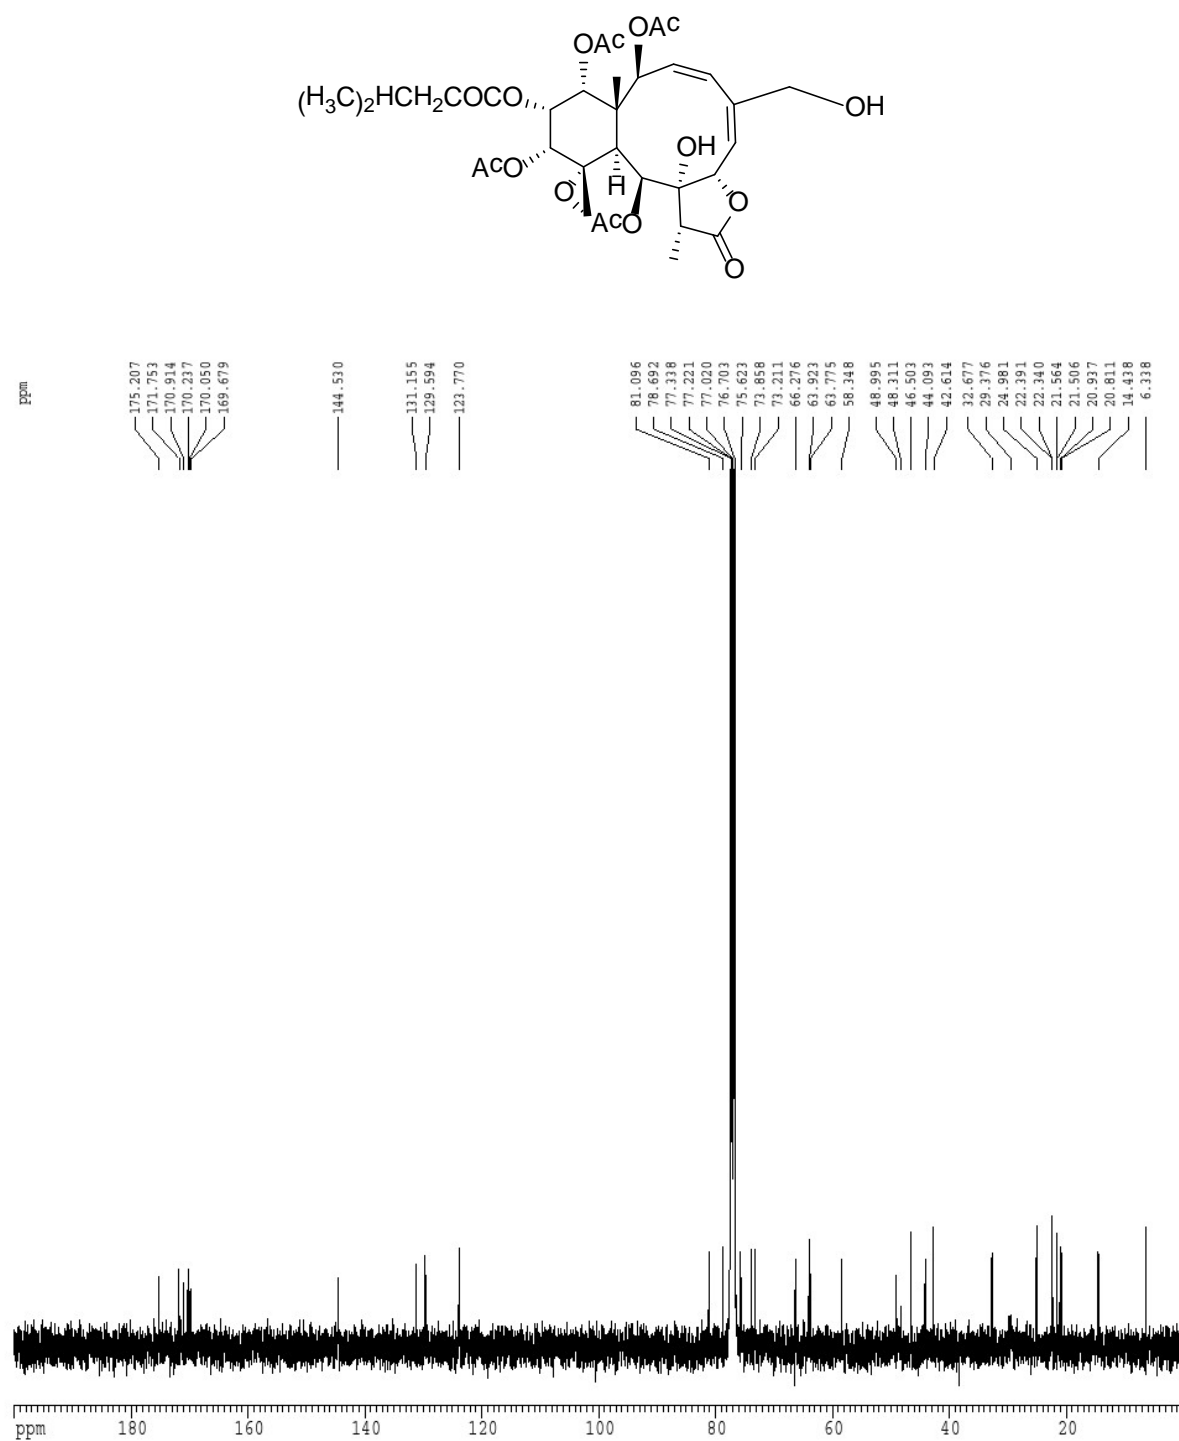

**Figure S12.** DEPT spectrum of the new compound 2.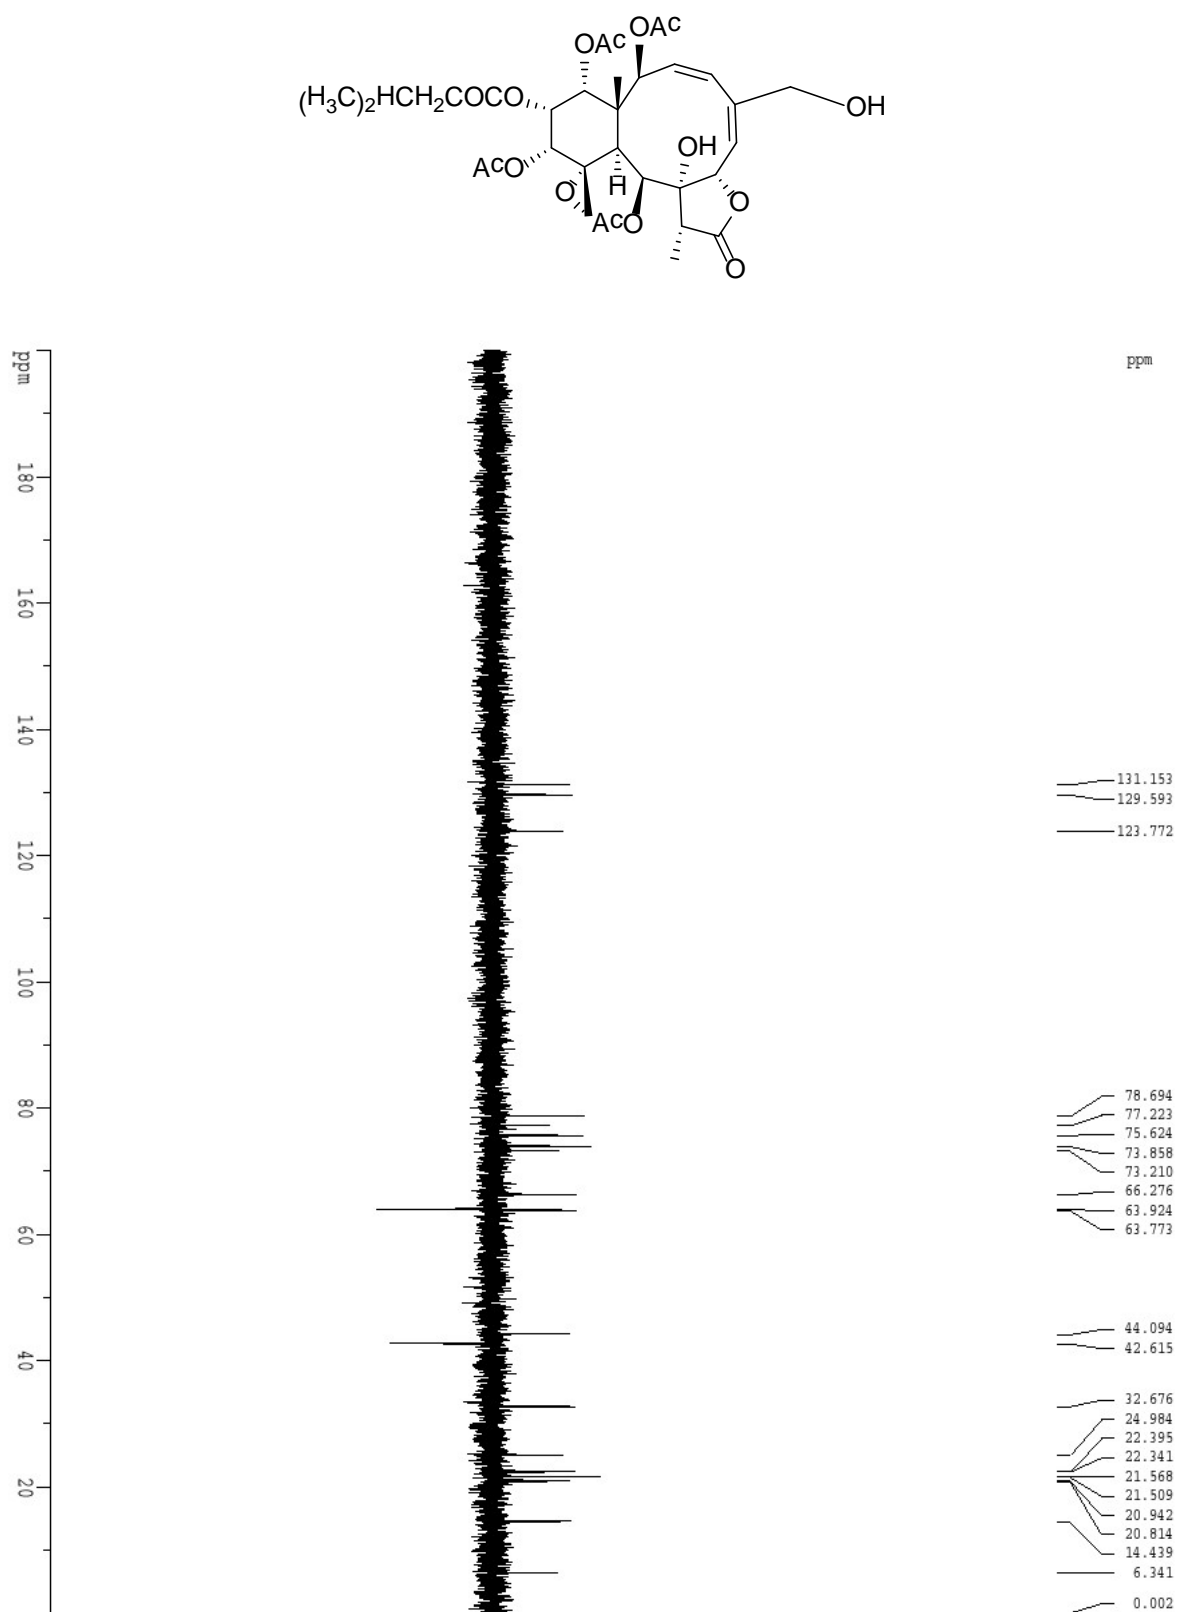

**Figure S13.** HSQC spectrum of the new compound 2.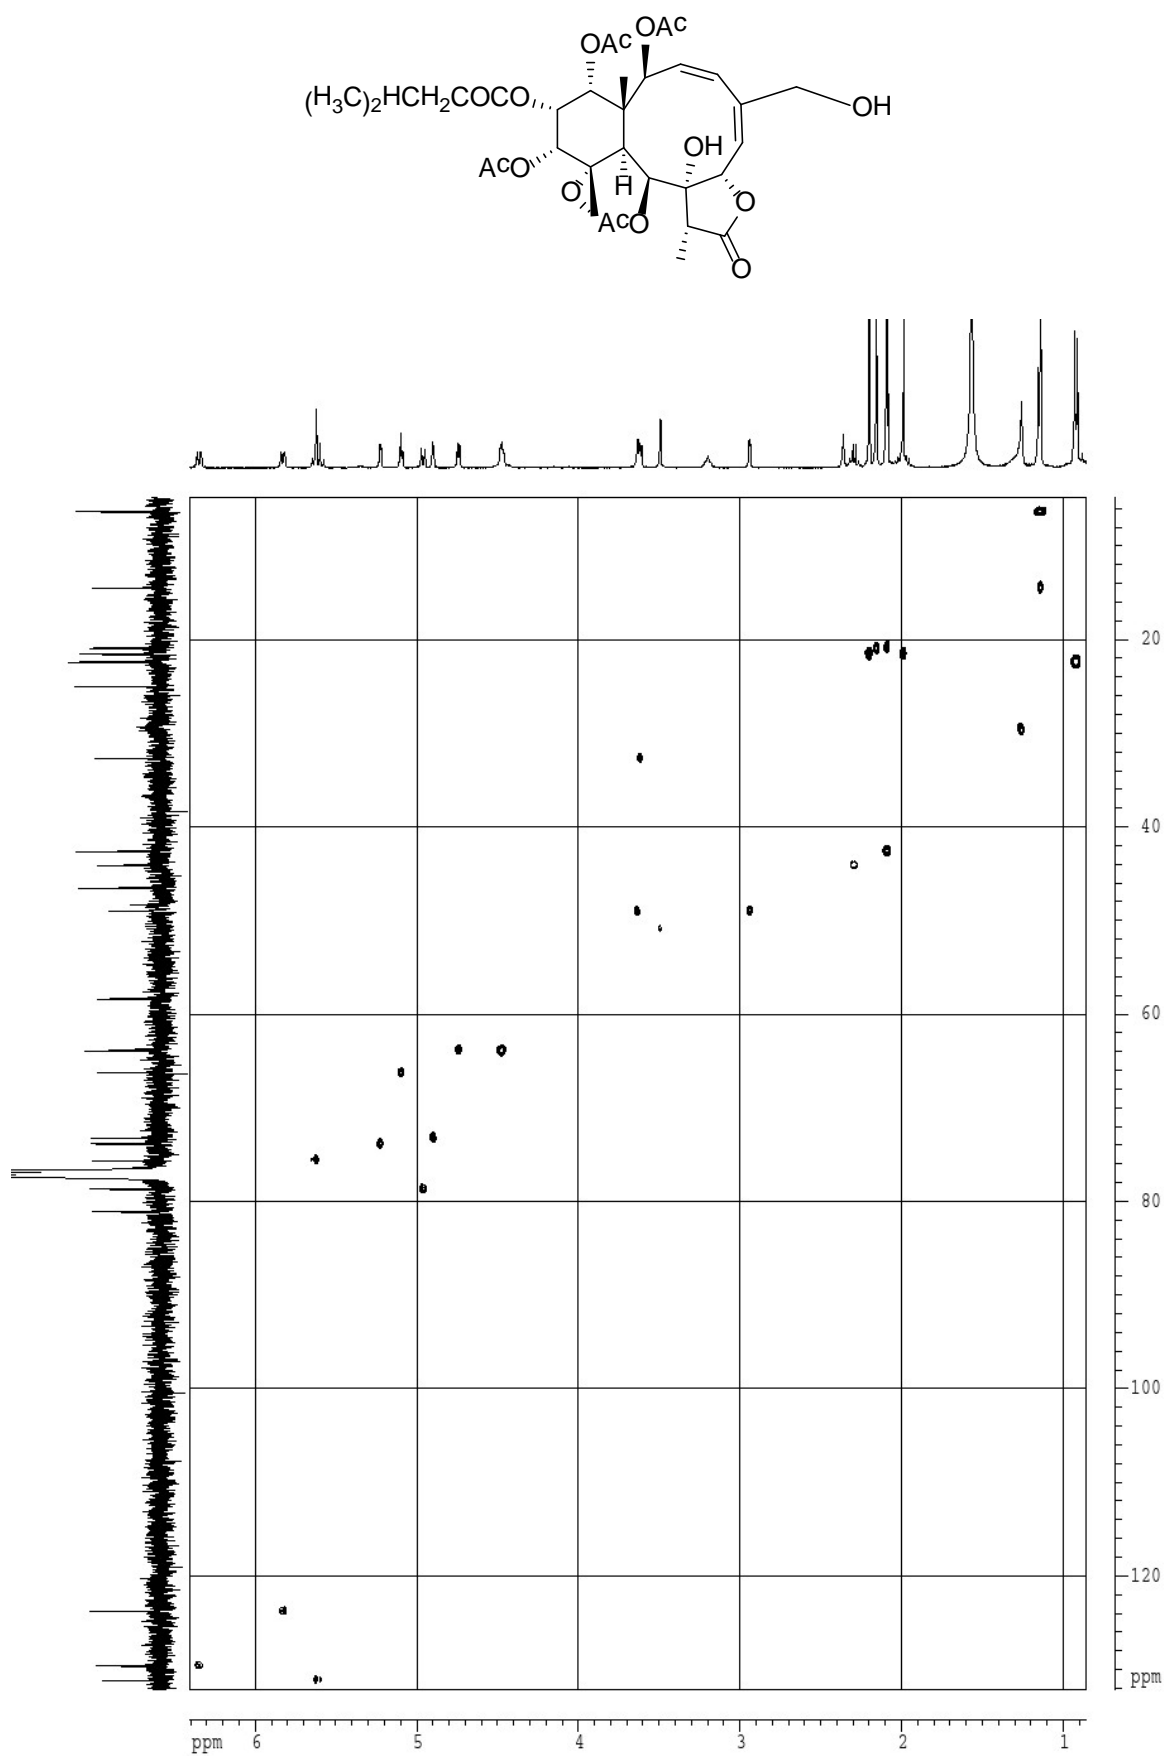

**Figure S14.** HMBC spectrum of the new compound 2.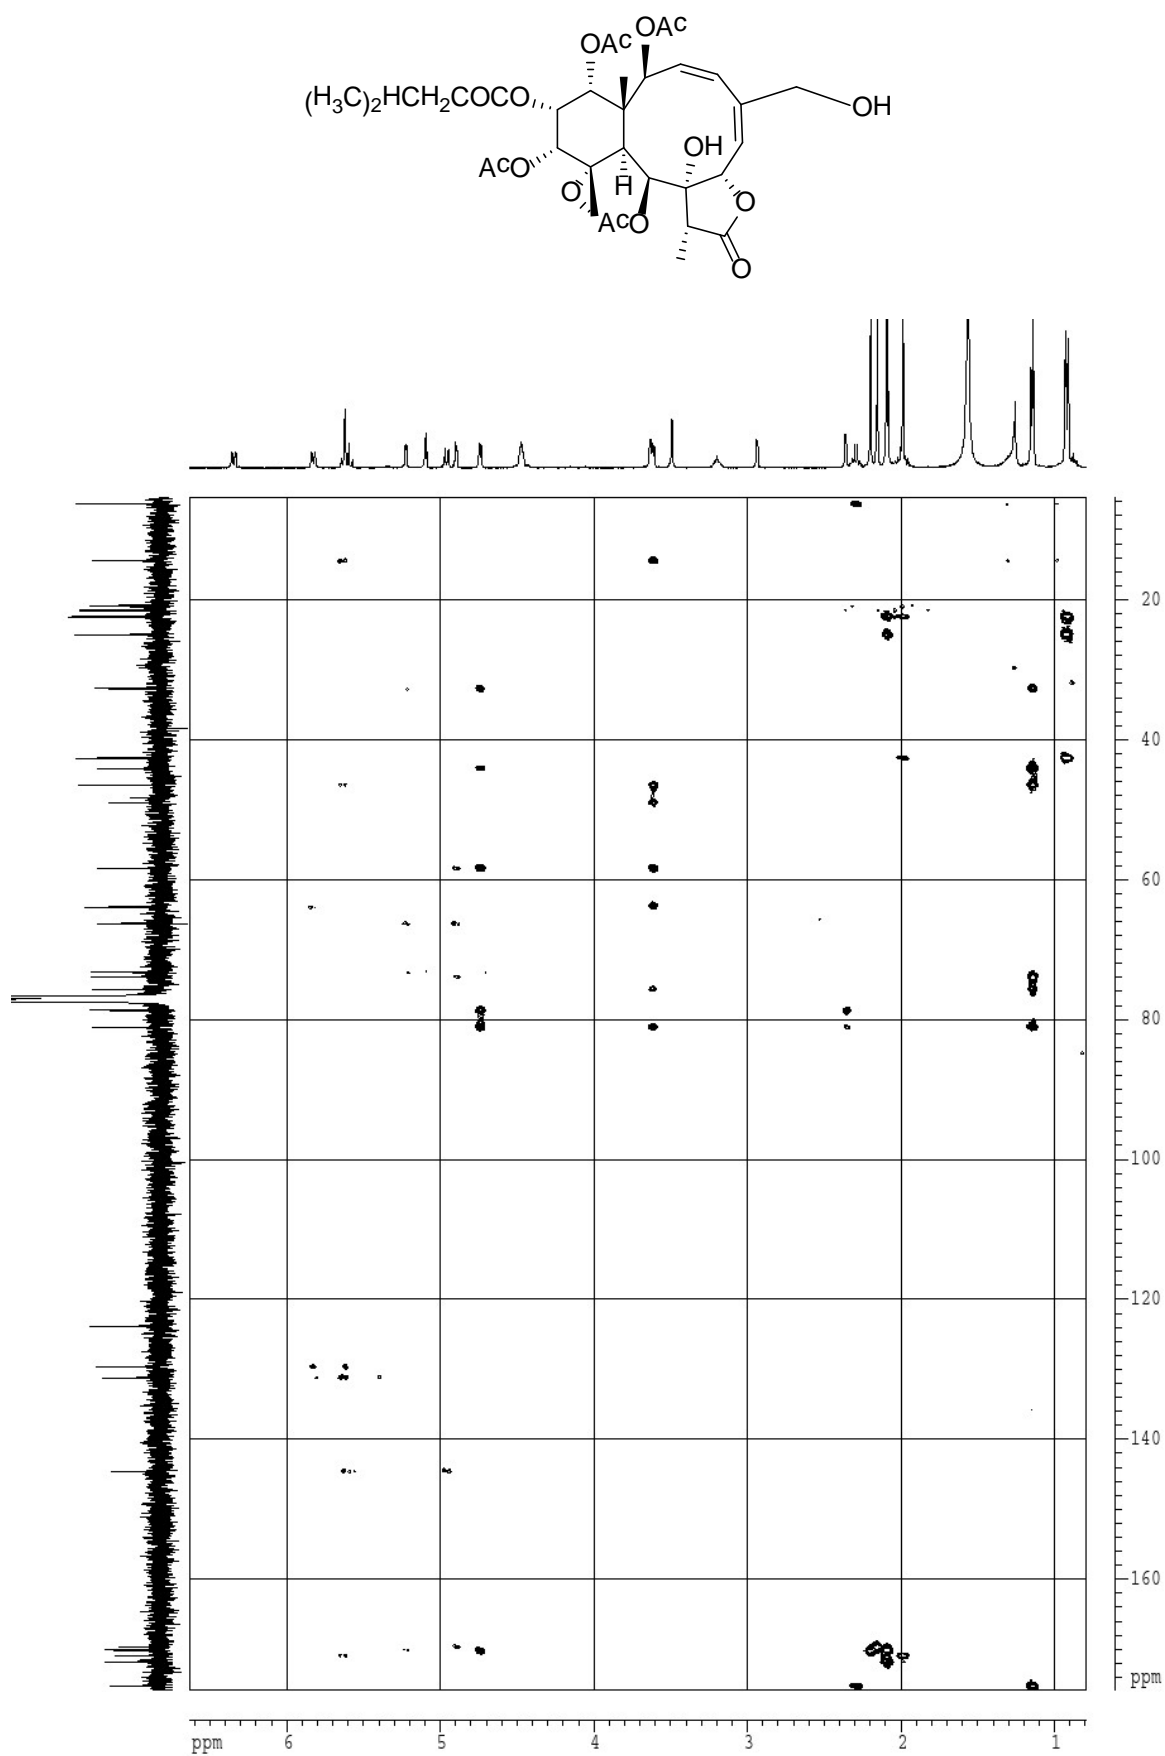



**Figure S15.** NOESY spectrum of the new compound 2.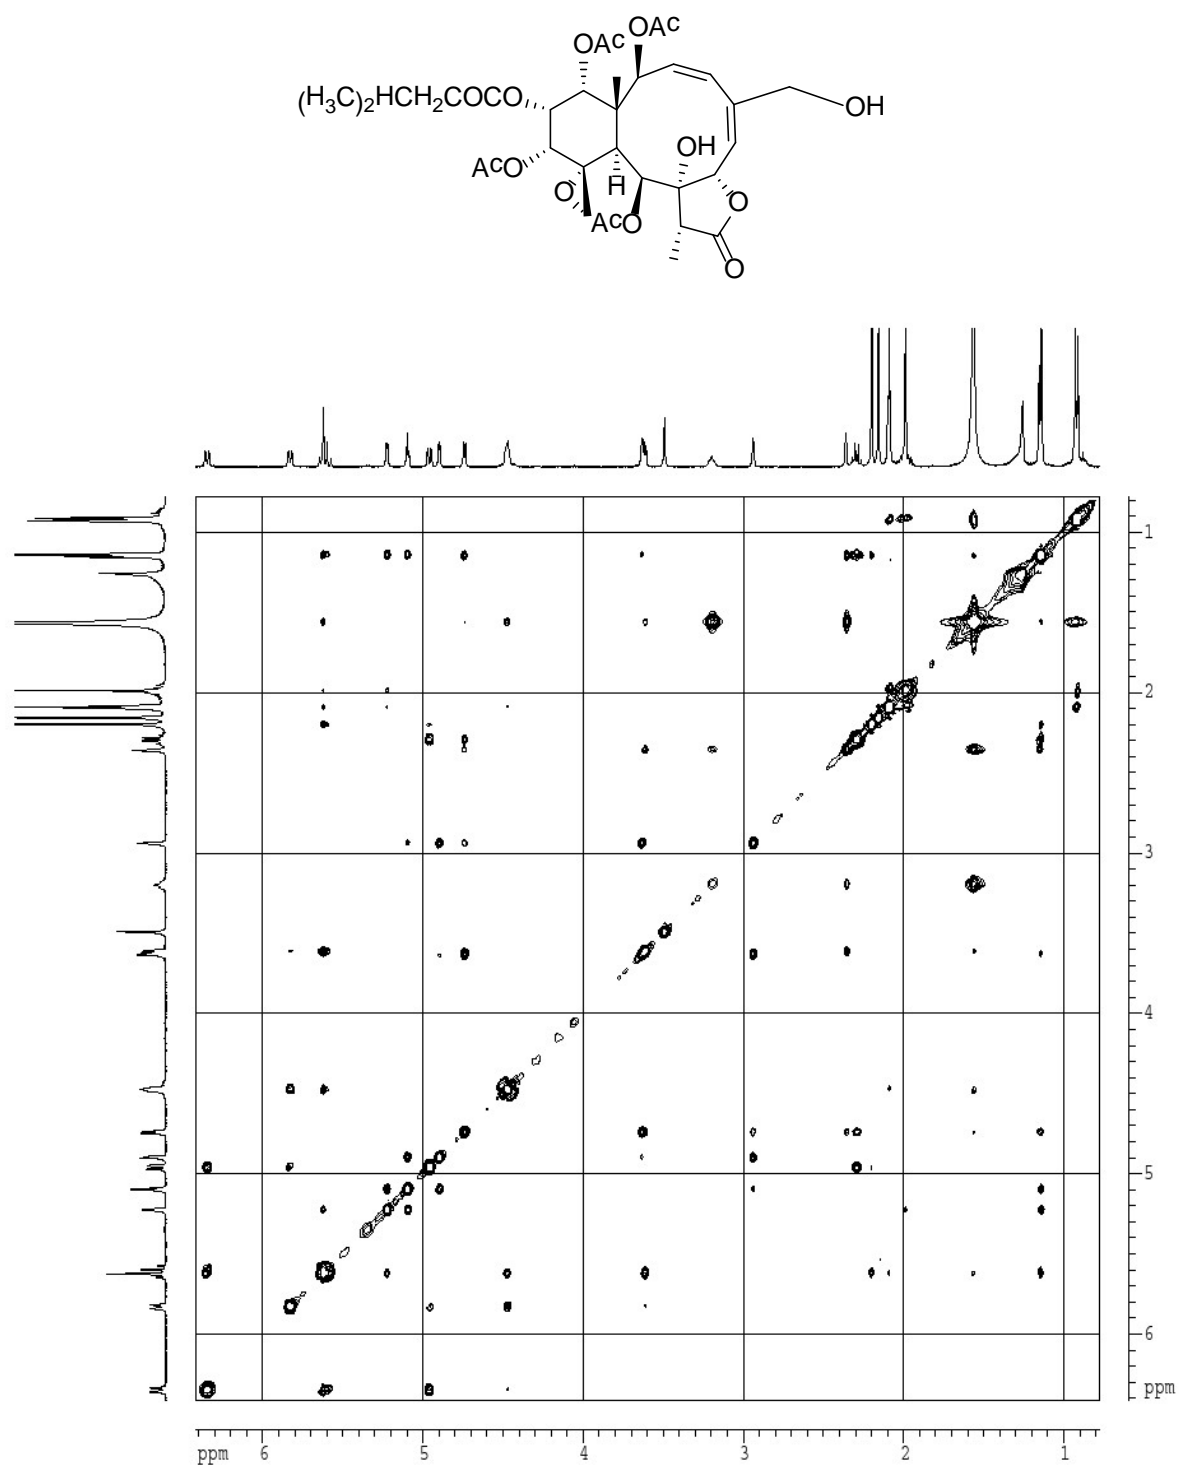

**Figure S16.** HR-ESIMS spectrum of the new compound **3**.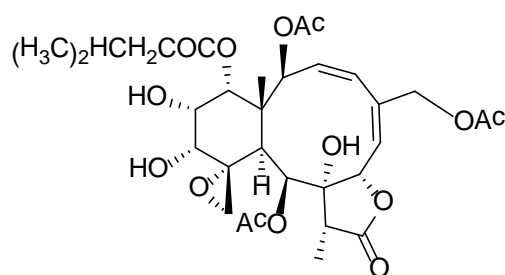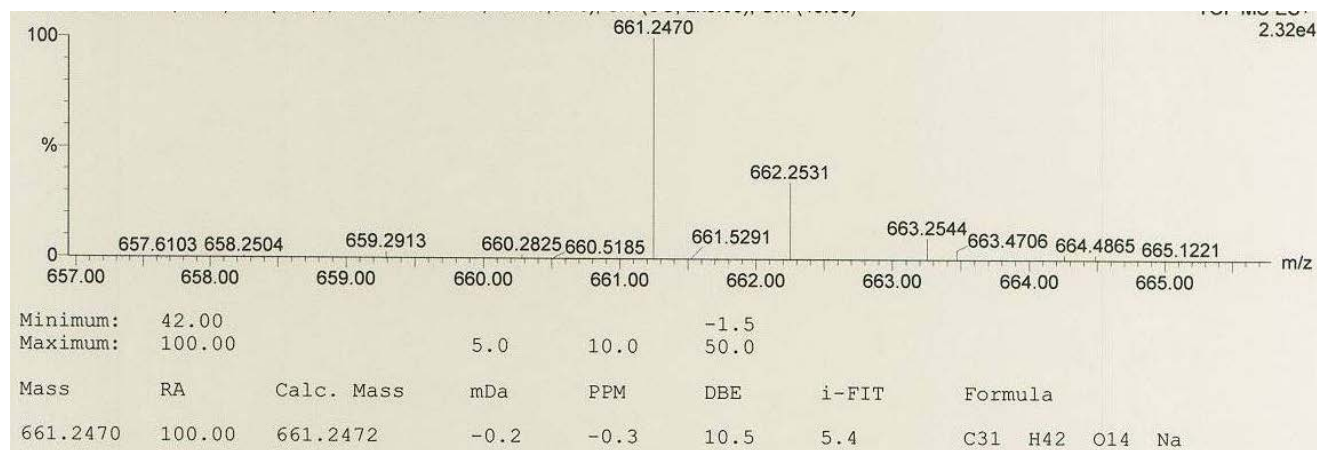

**Figure S17.**  $^1\text{H}$  NMR spectrum of the new compound 3.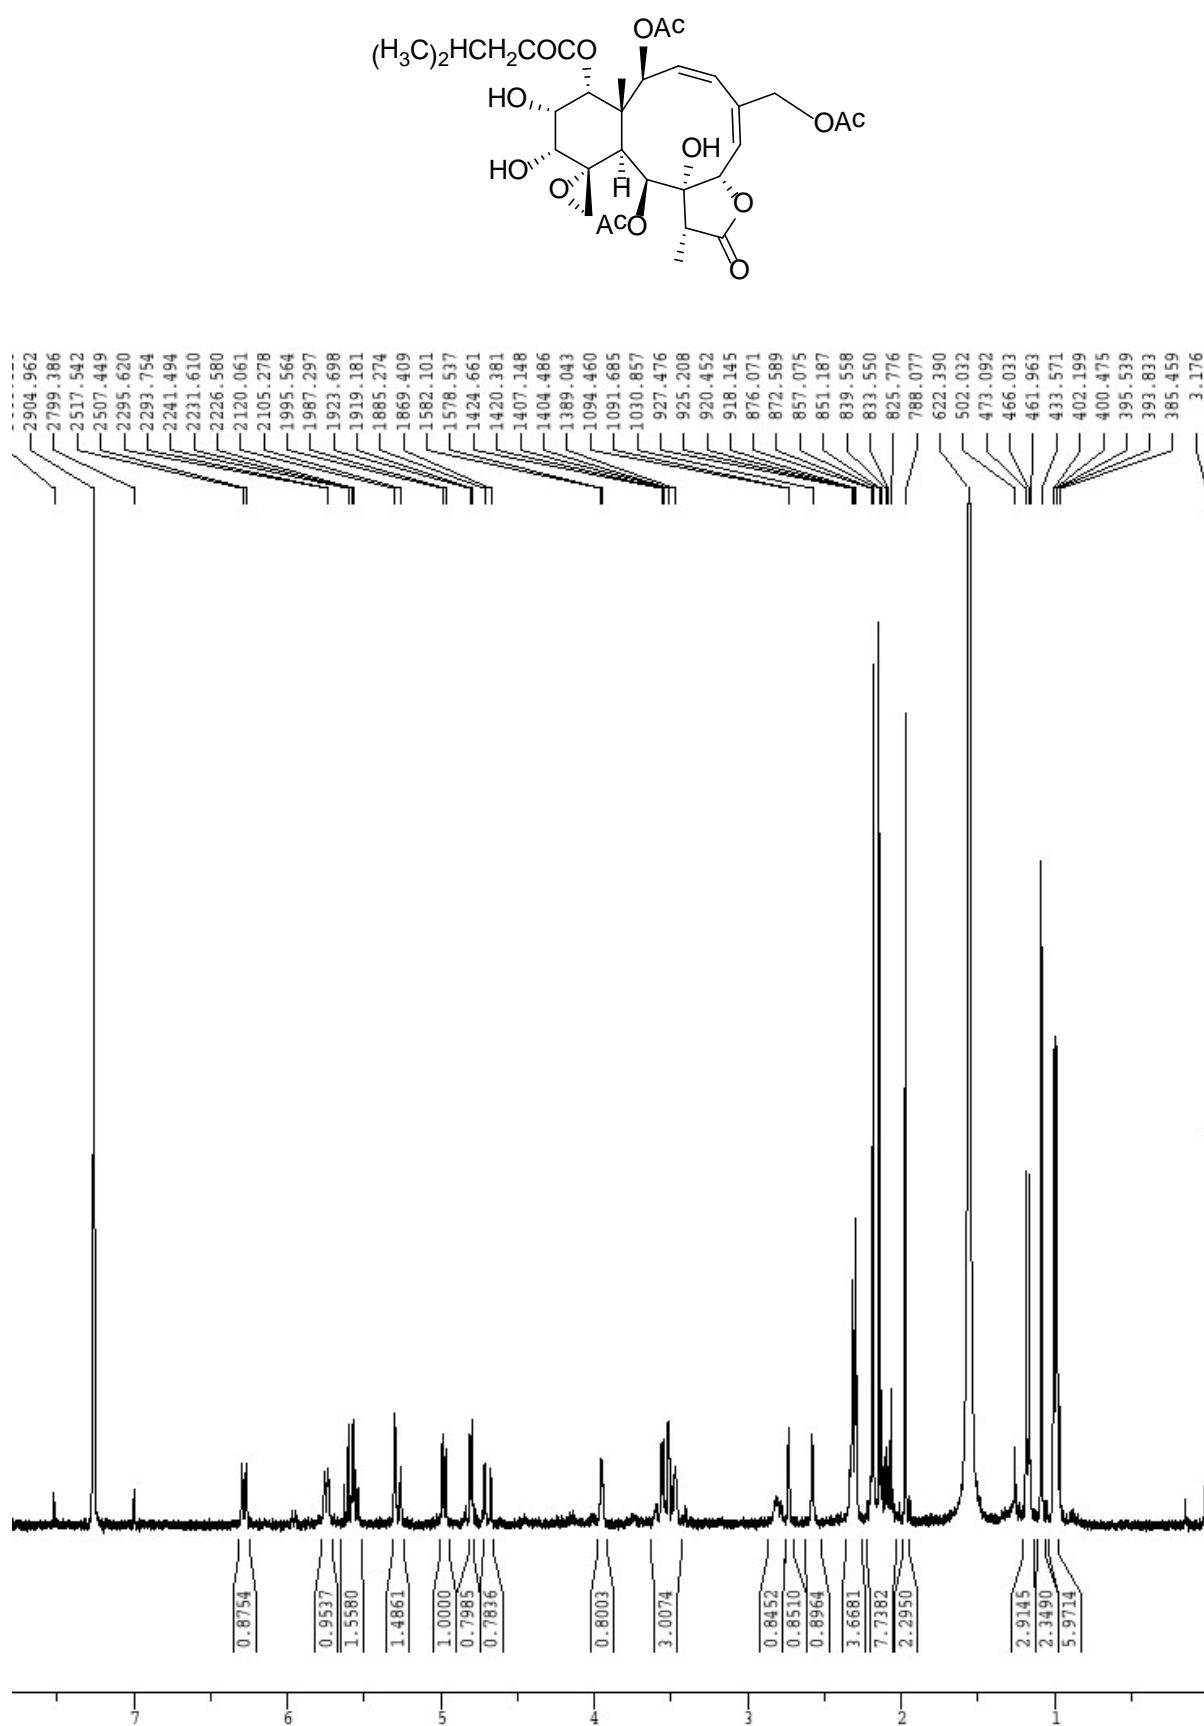

**Figure S18.**  $^{13}\text{C}$  NMR spectrum of the new compound **3**.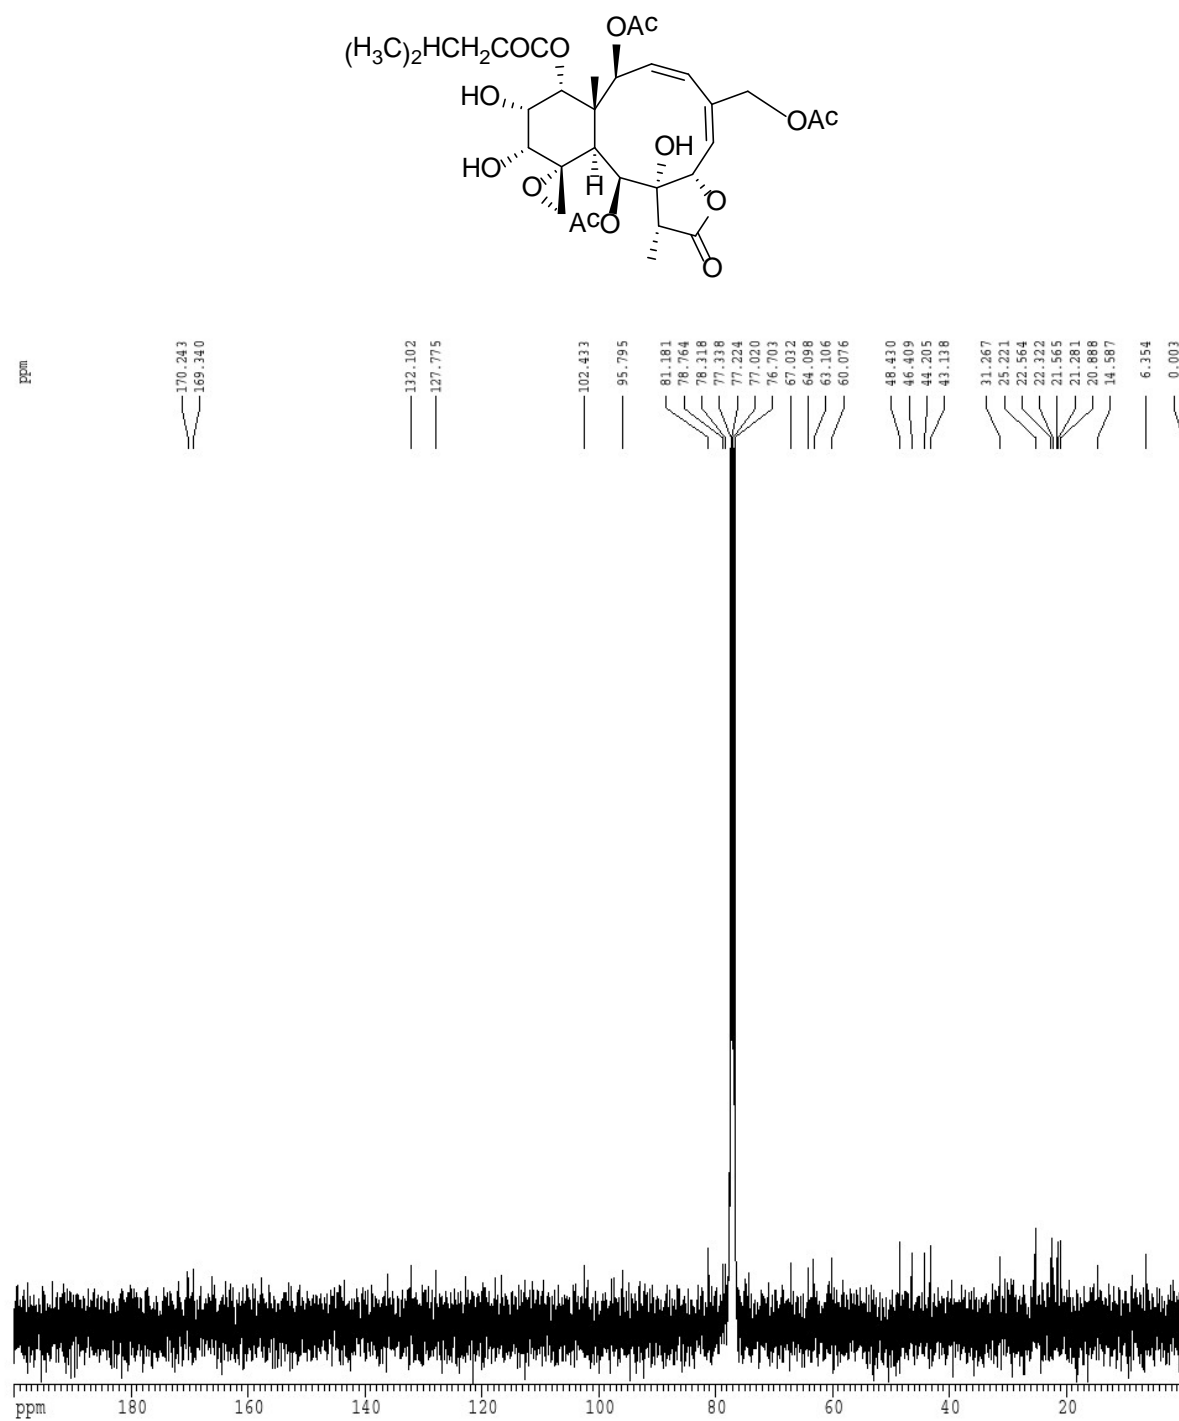

**Figure S19.** DEPT spectrum of the new compound **3**.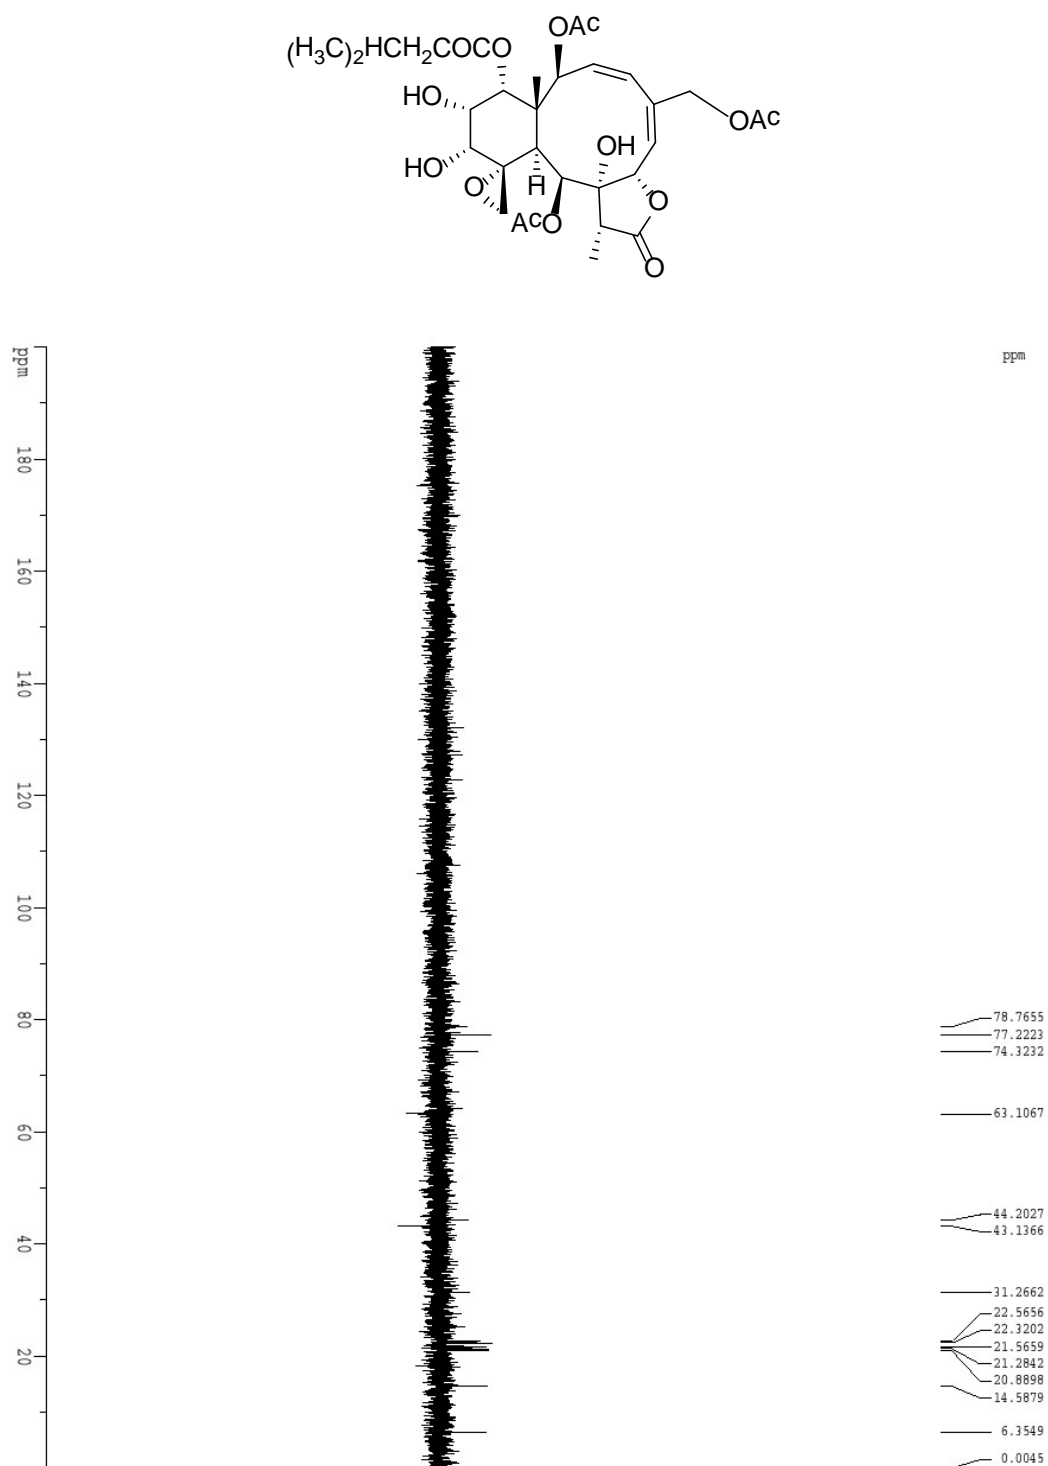

**Figure S20.** HSQC spectrum of the new compound **3**.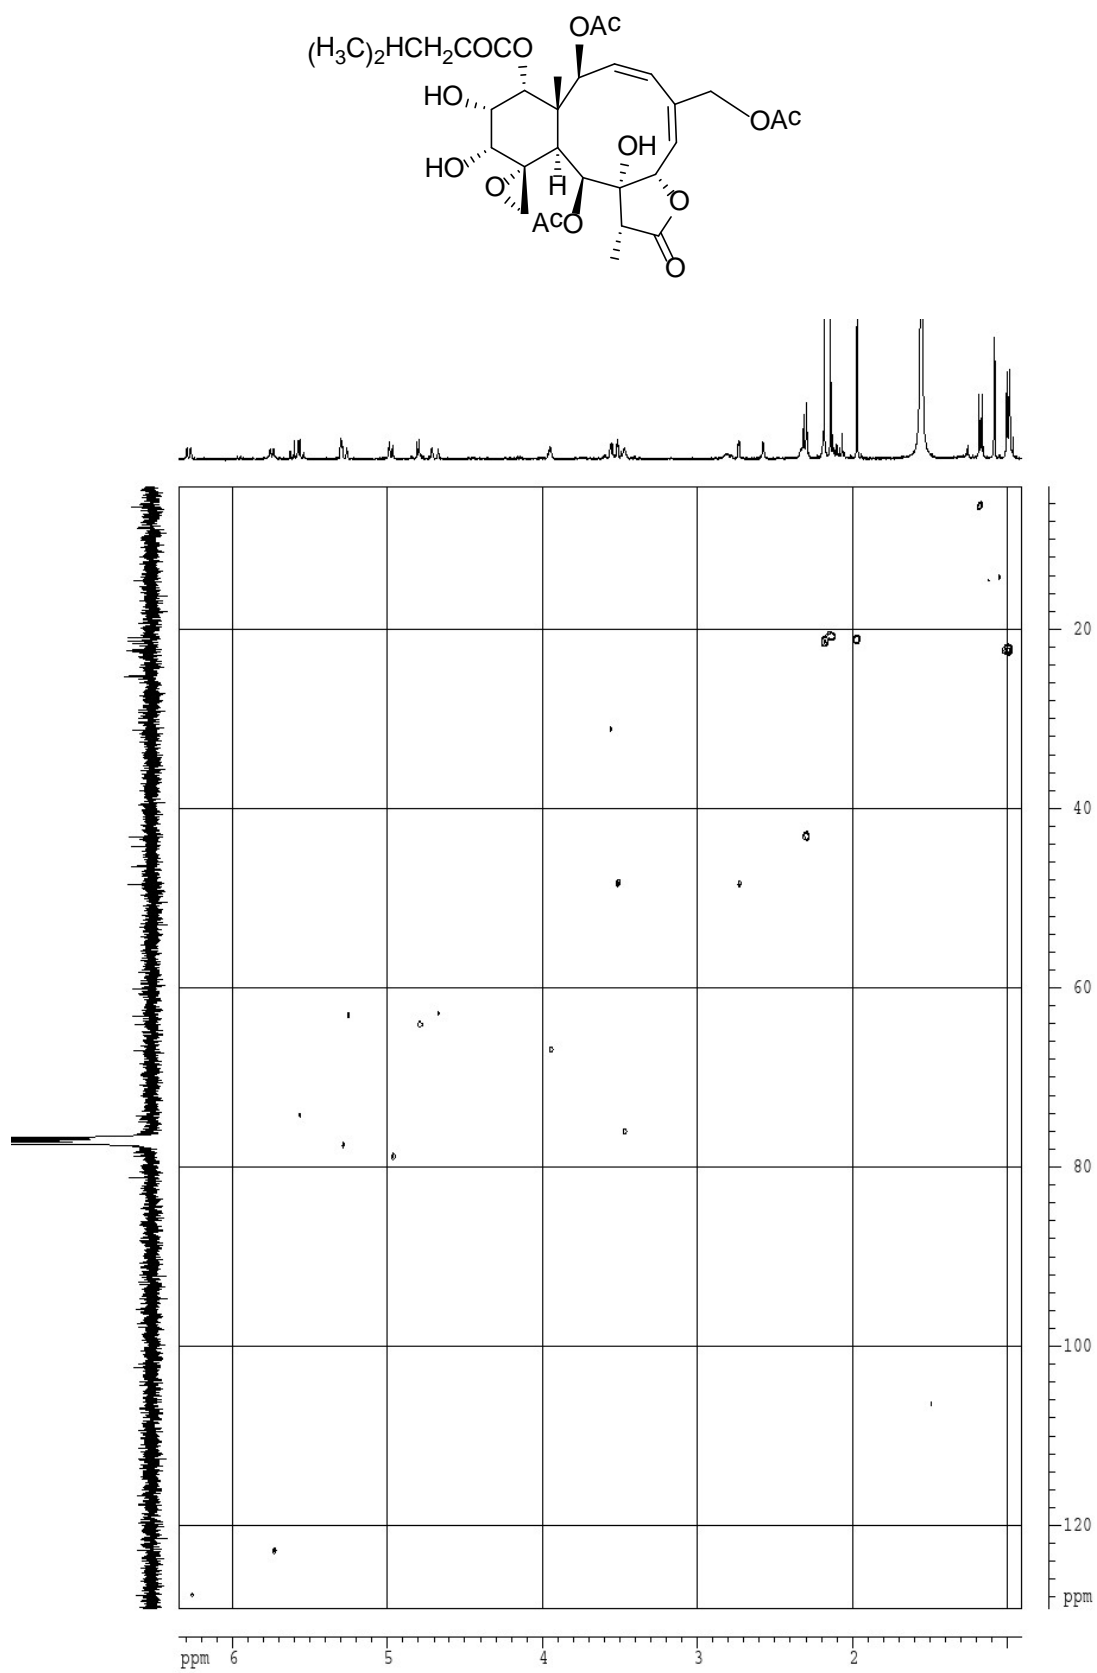

**Figure S21.**  $^1\text{H}$ - $^1\text{H}$  COSY spectrum of the new compound 3.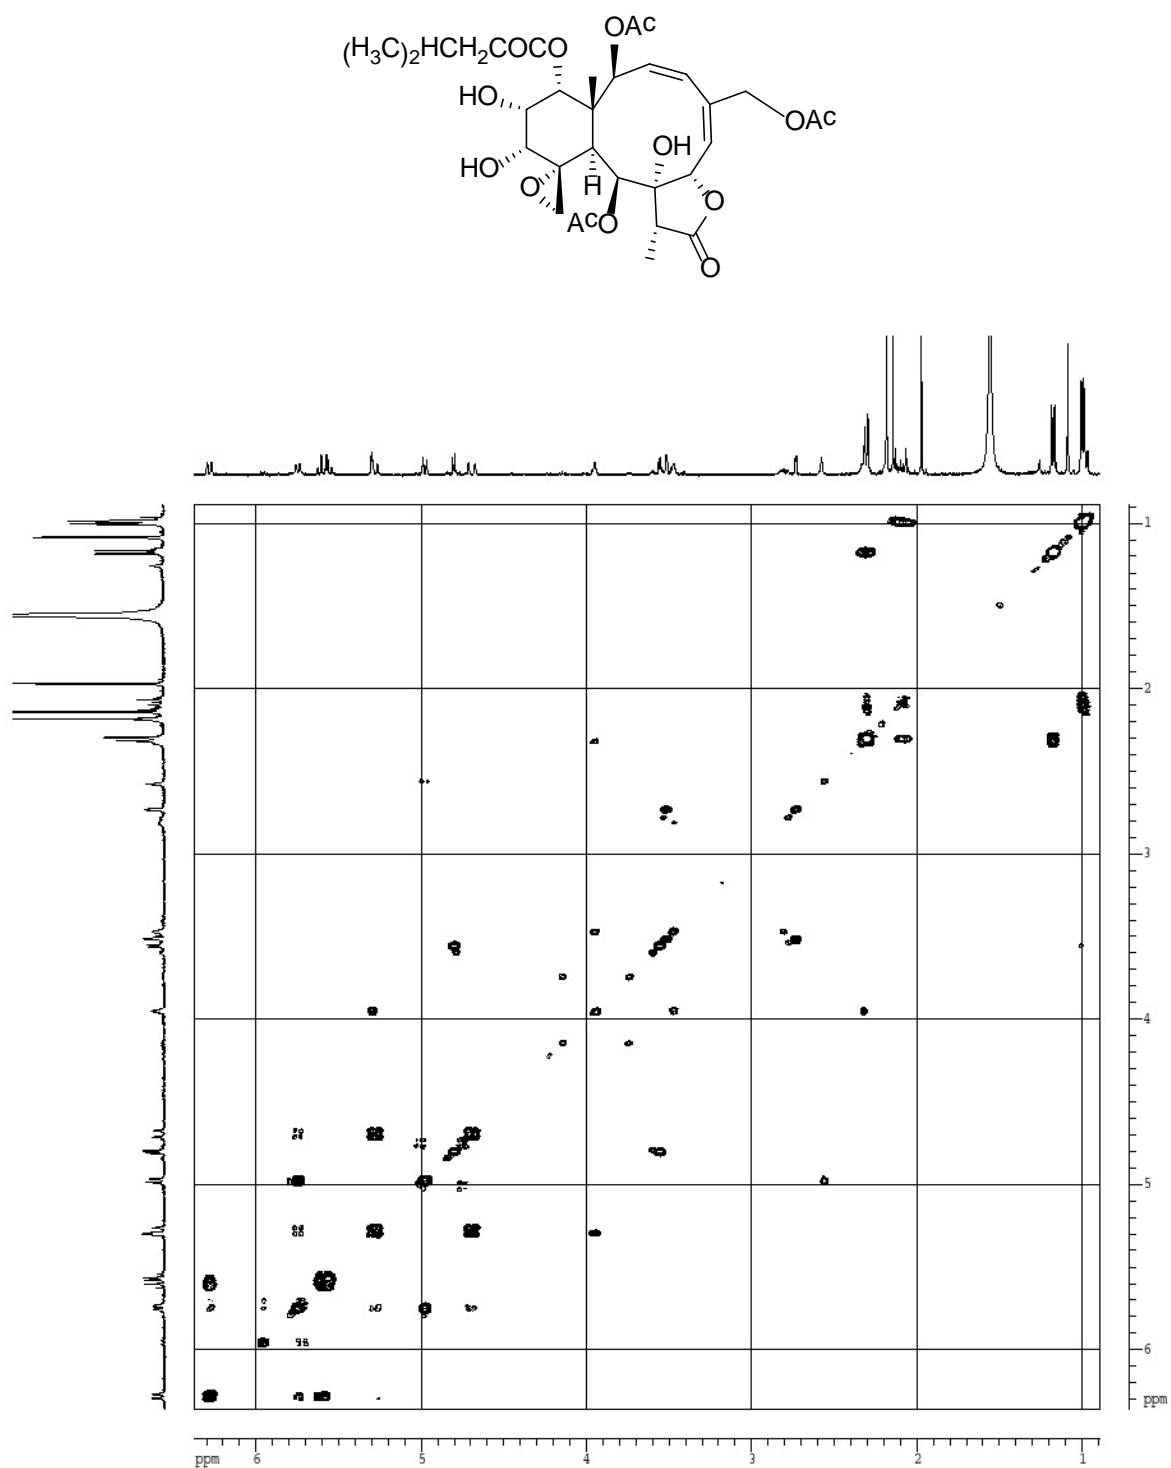

**Figure S22.** HMBC spectrum of the new compound **3**.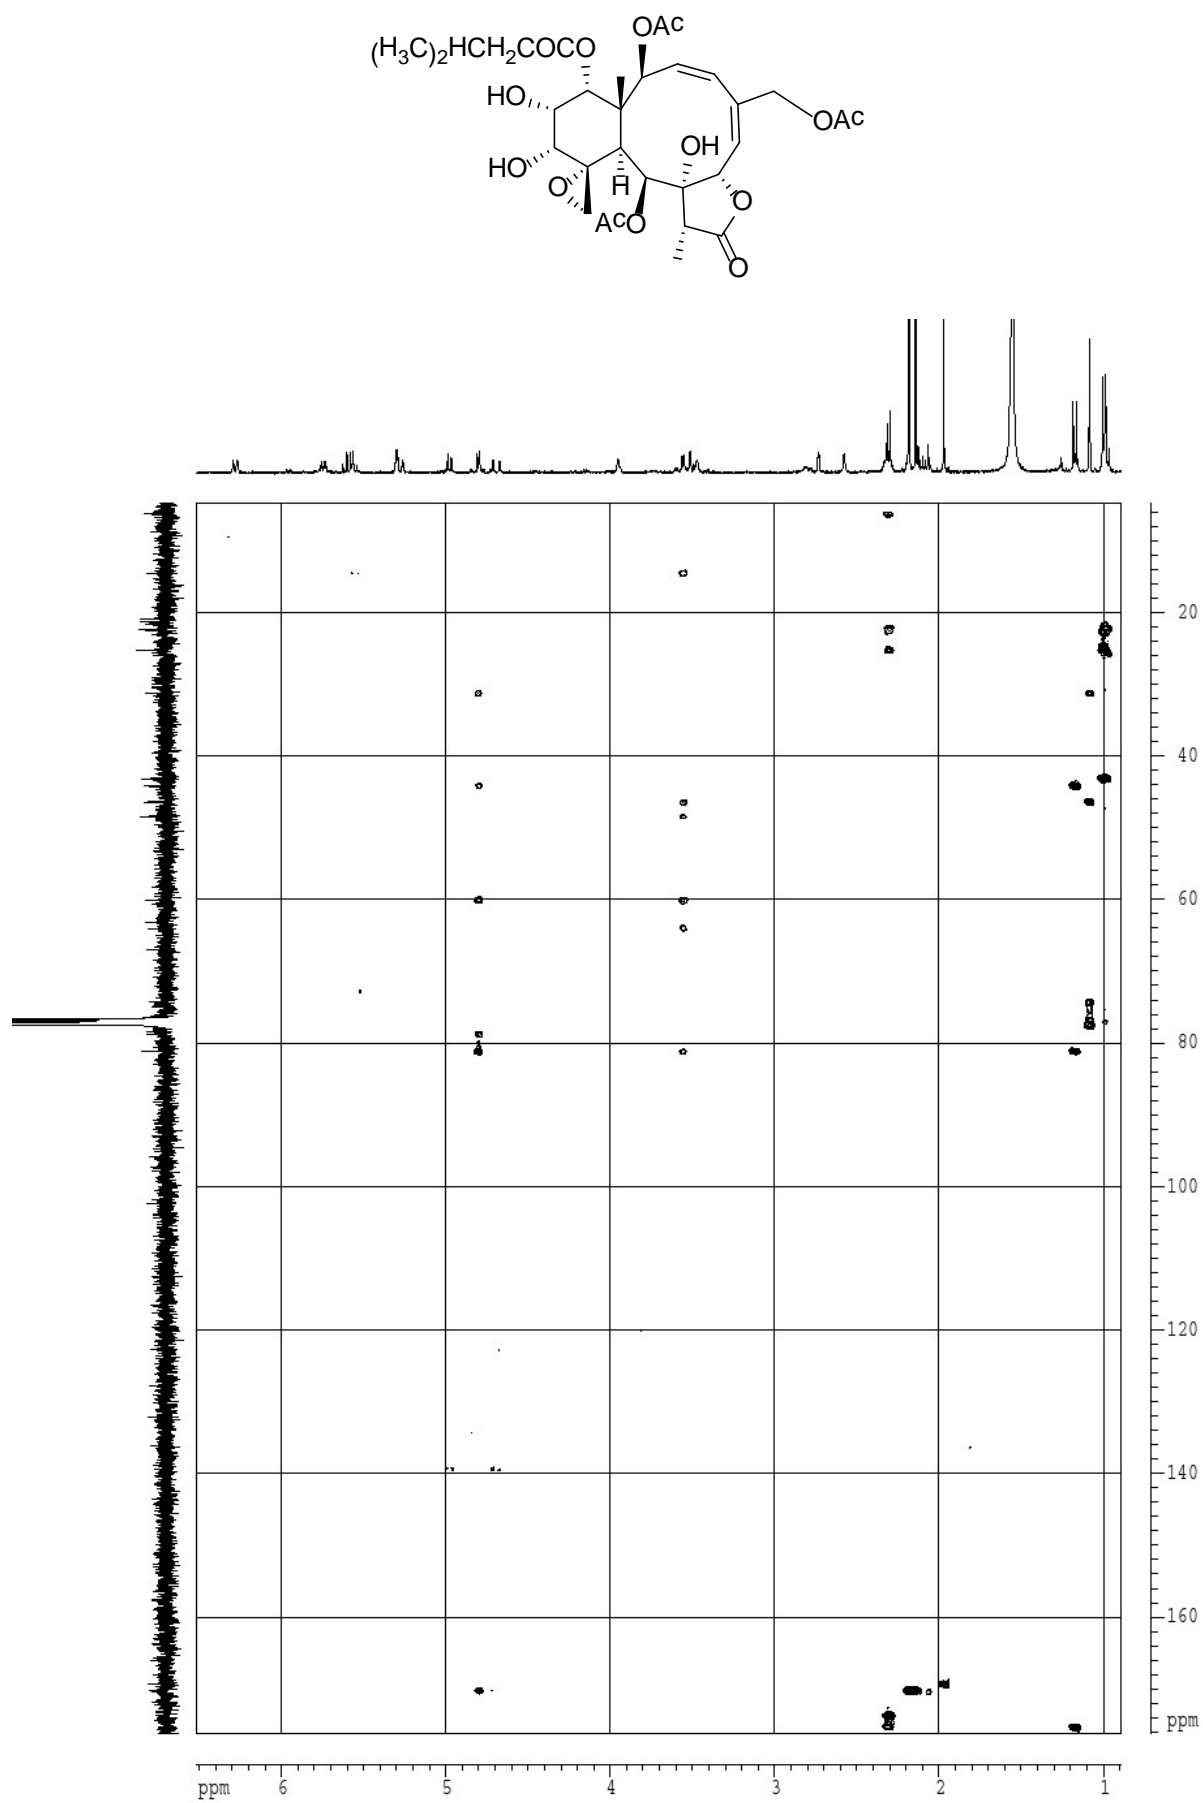



**Figure S23.** NOESY spectrum of the new compound **3**.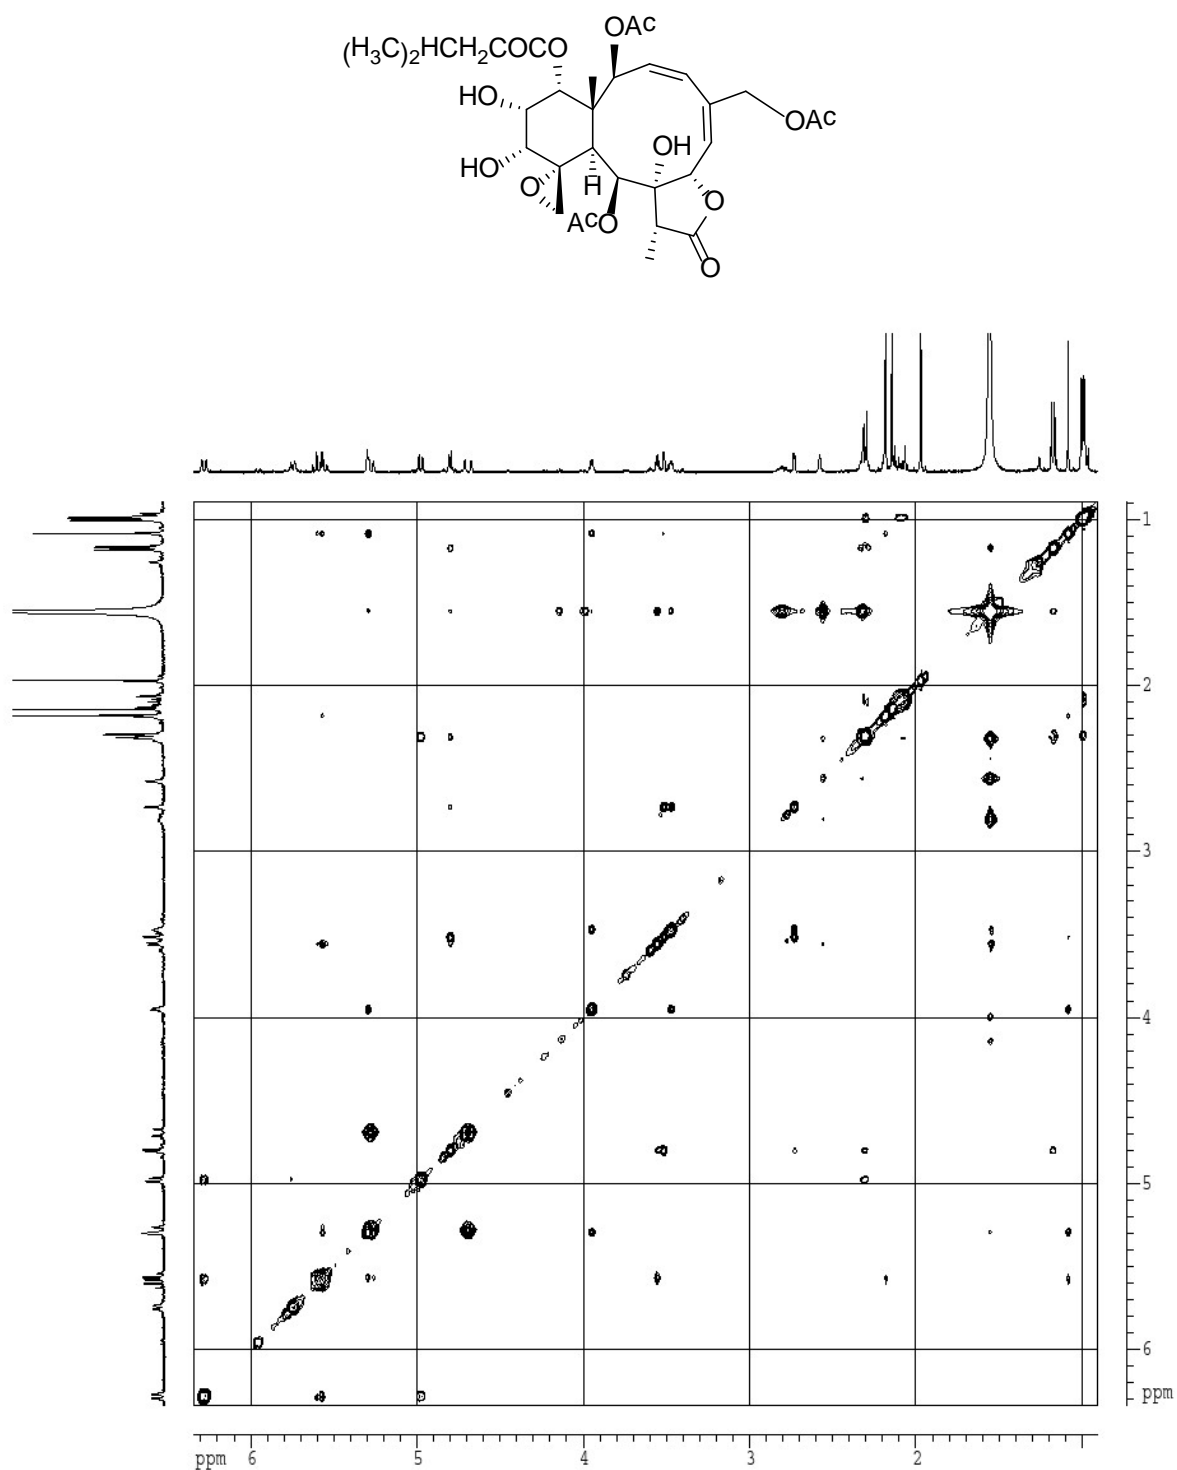

**Figure S24.** HR-ESIMS spectrum of the new compound **4**.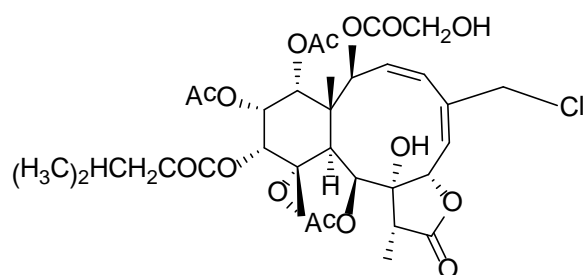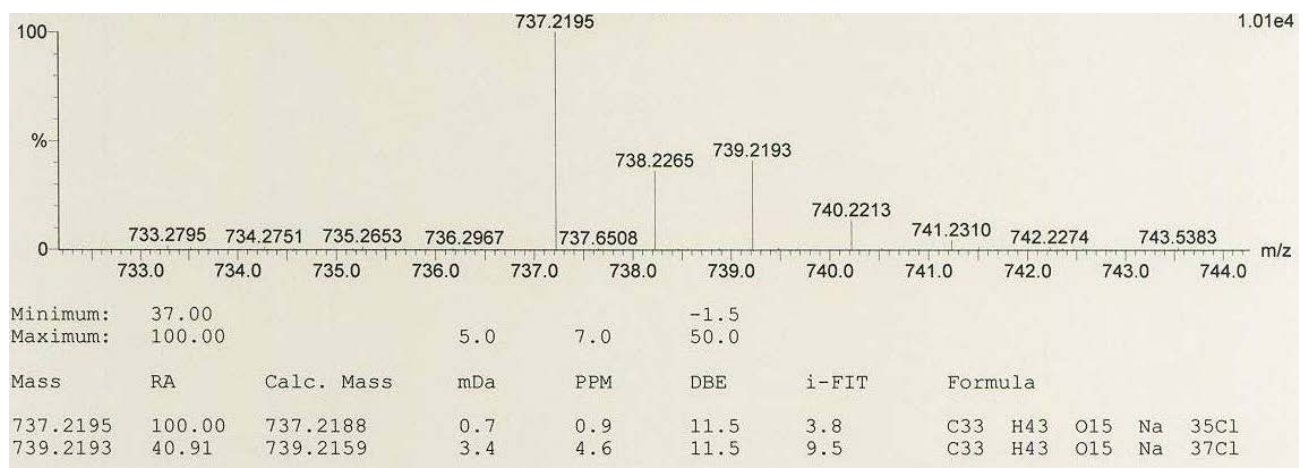

[illegible]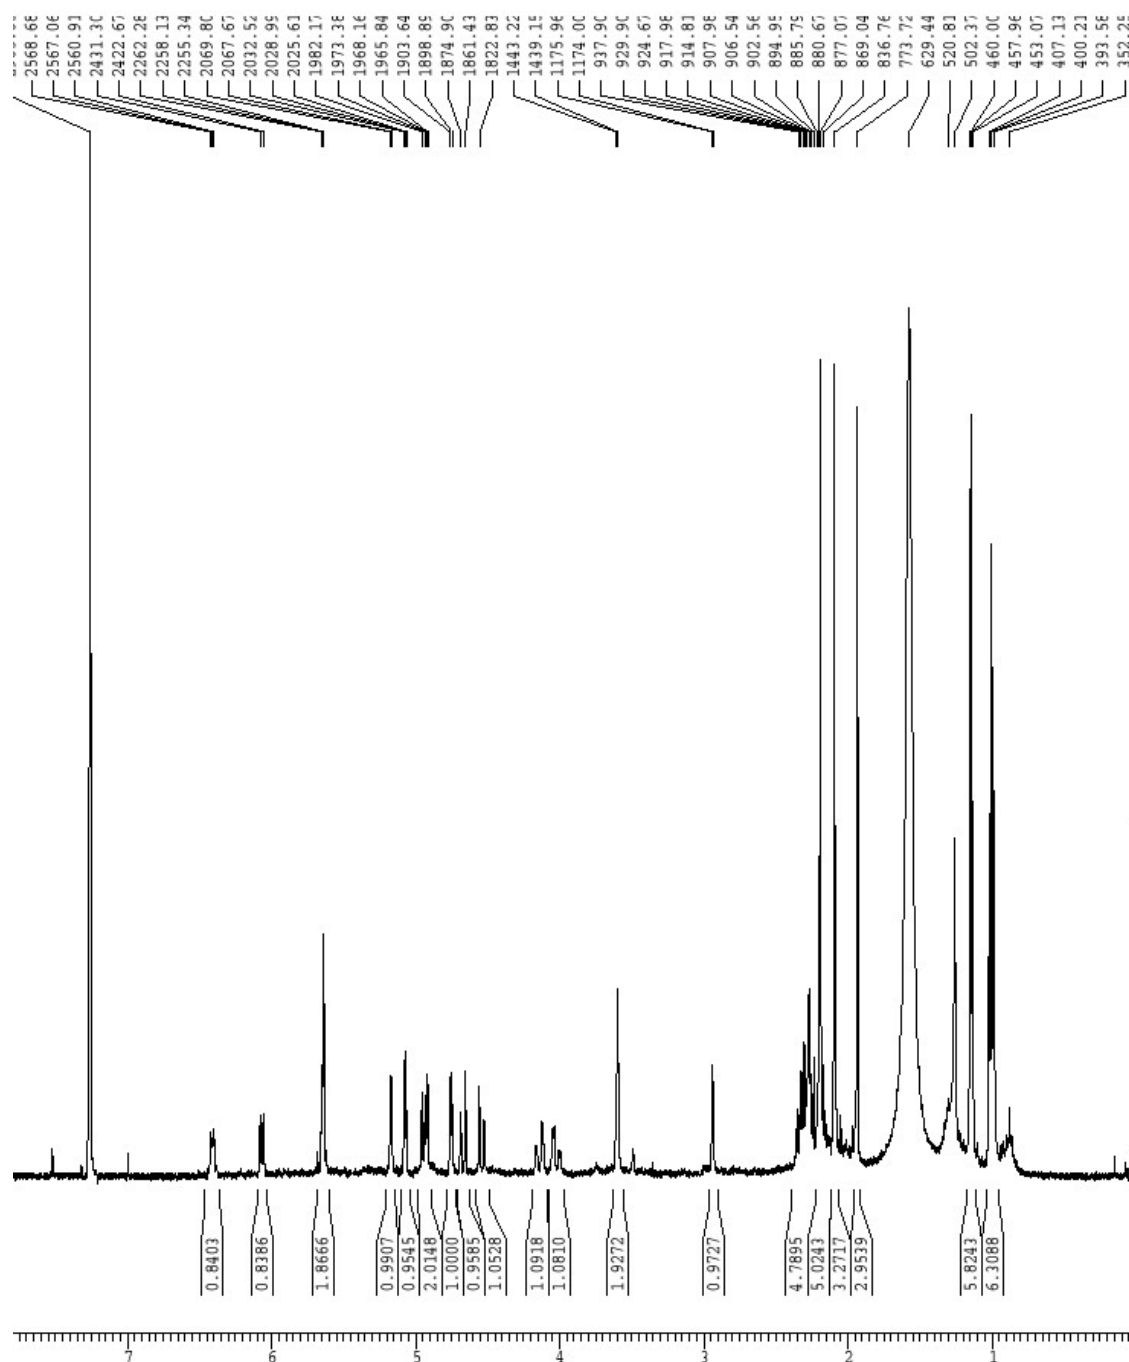

**Figure S26.**  $^{13}\text{C}$  NMR spectrum of the new compound 4.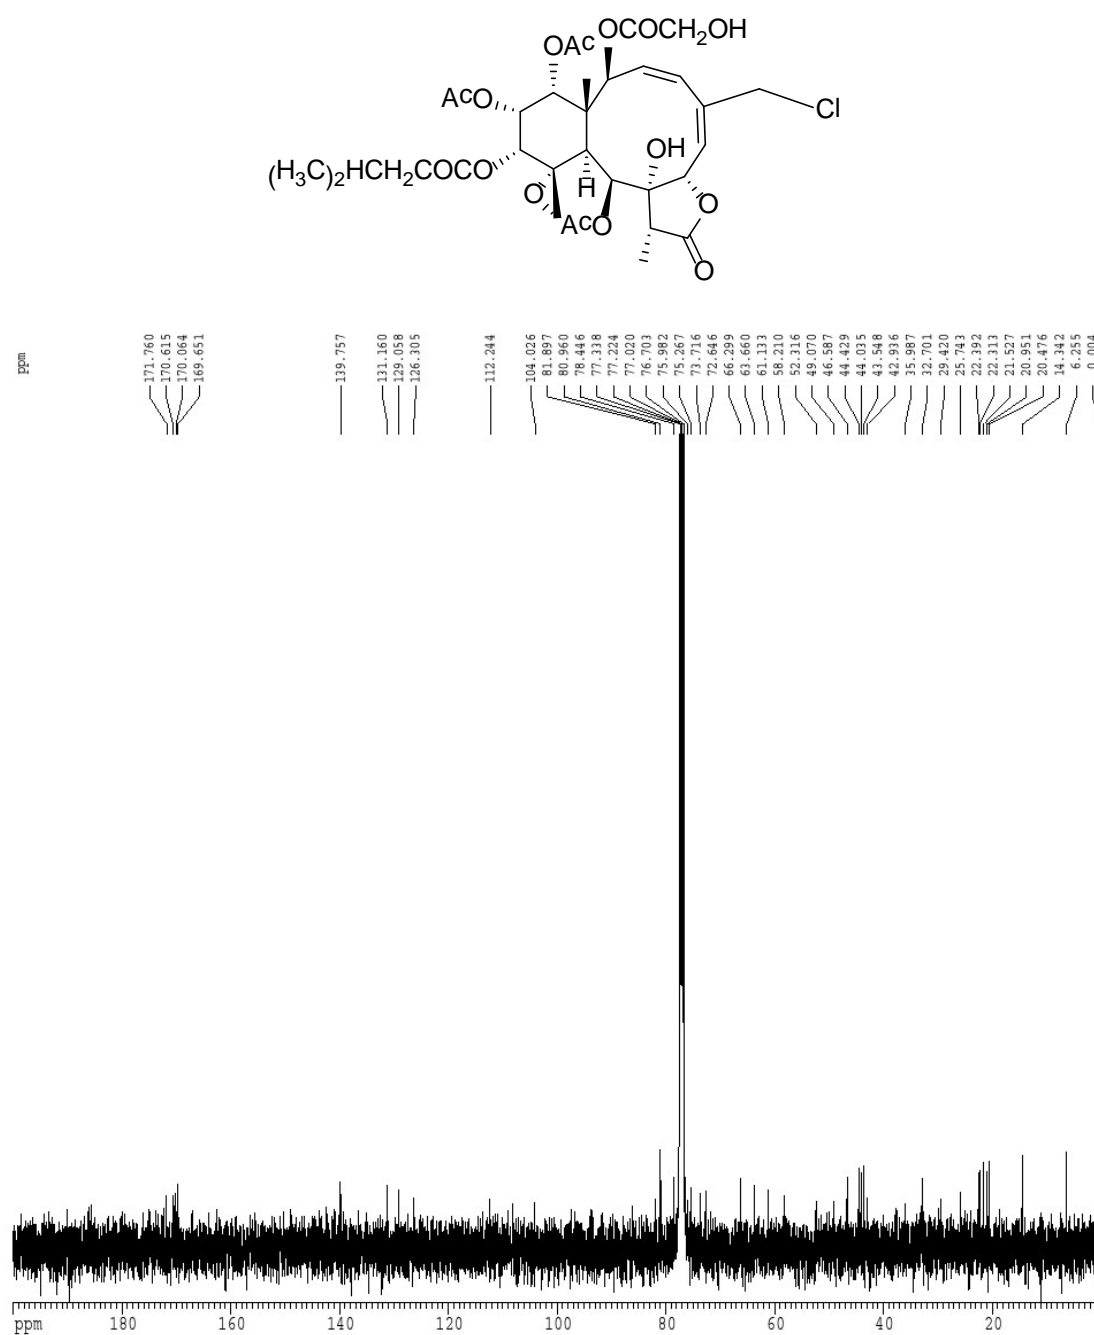

**Figure S27.** DEPT spectrum of the new compound **4**.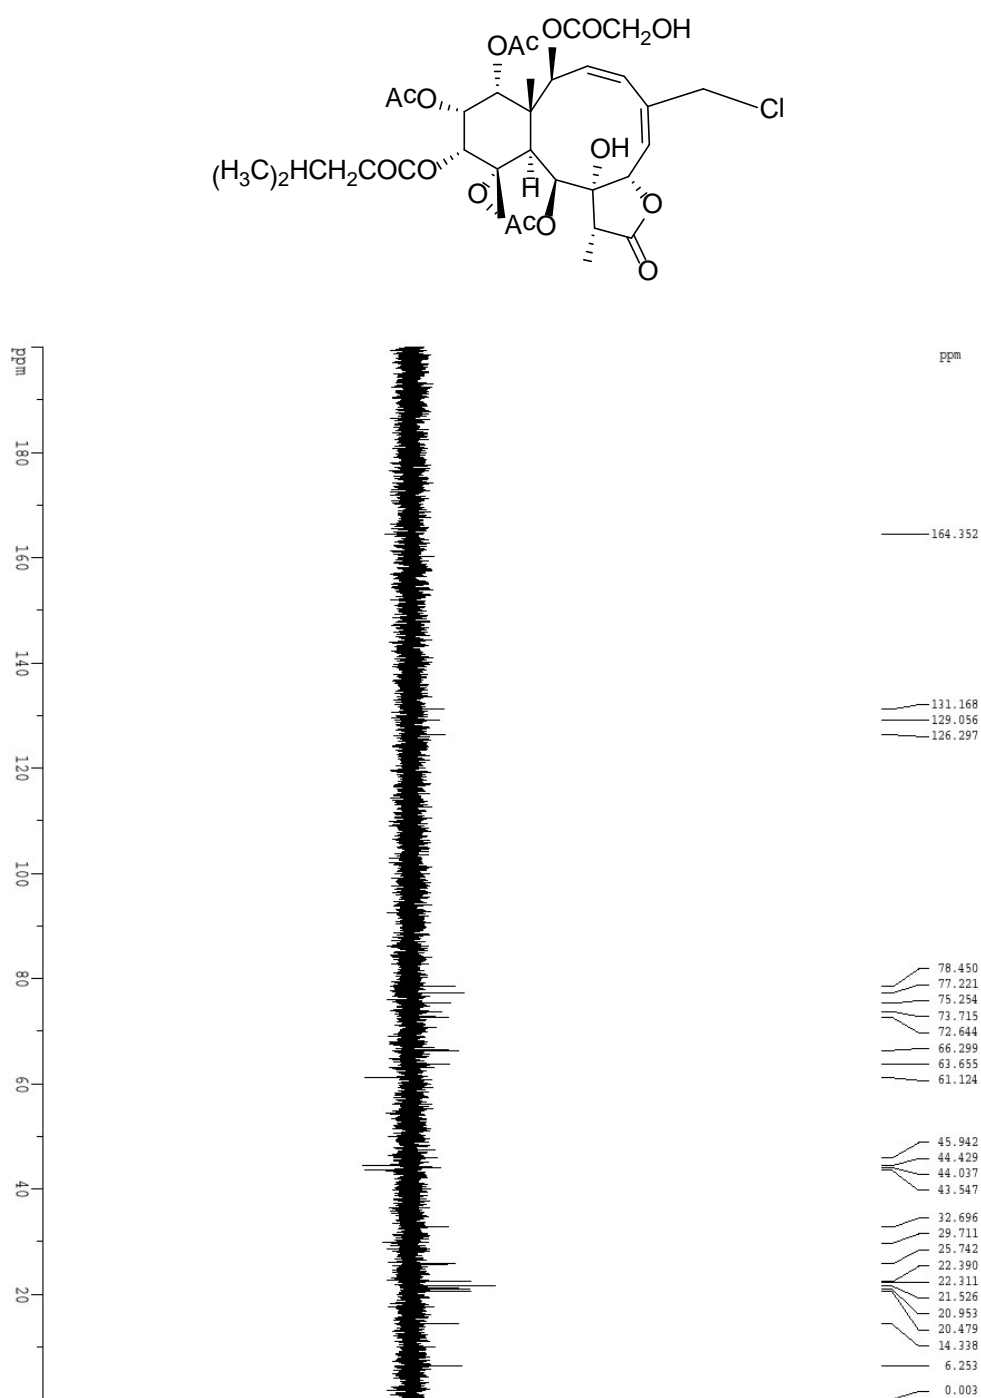

**Figure S28.** HSQC spectrum of the new compound **4**.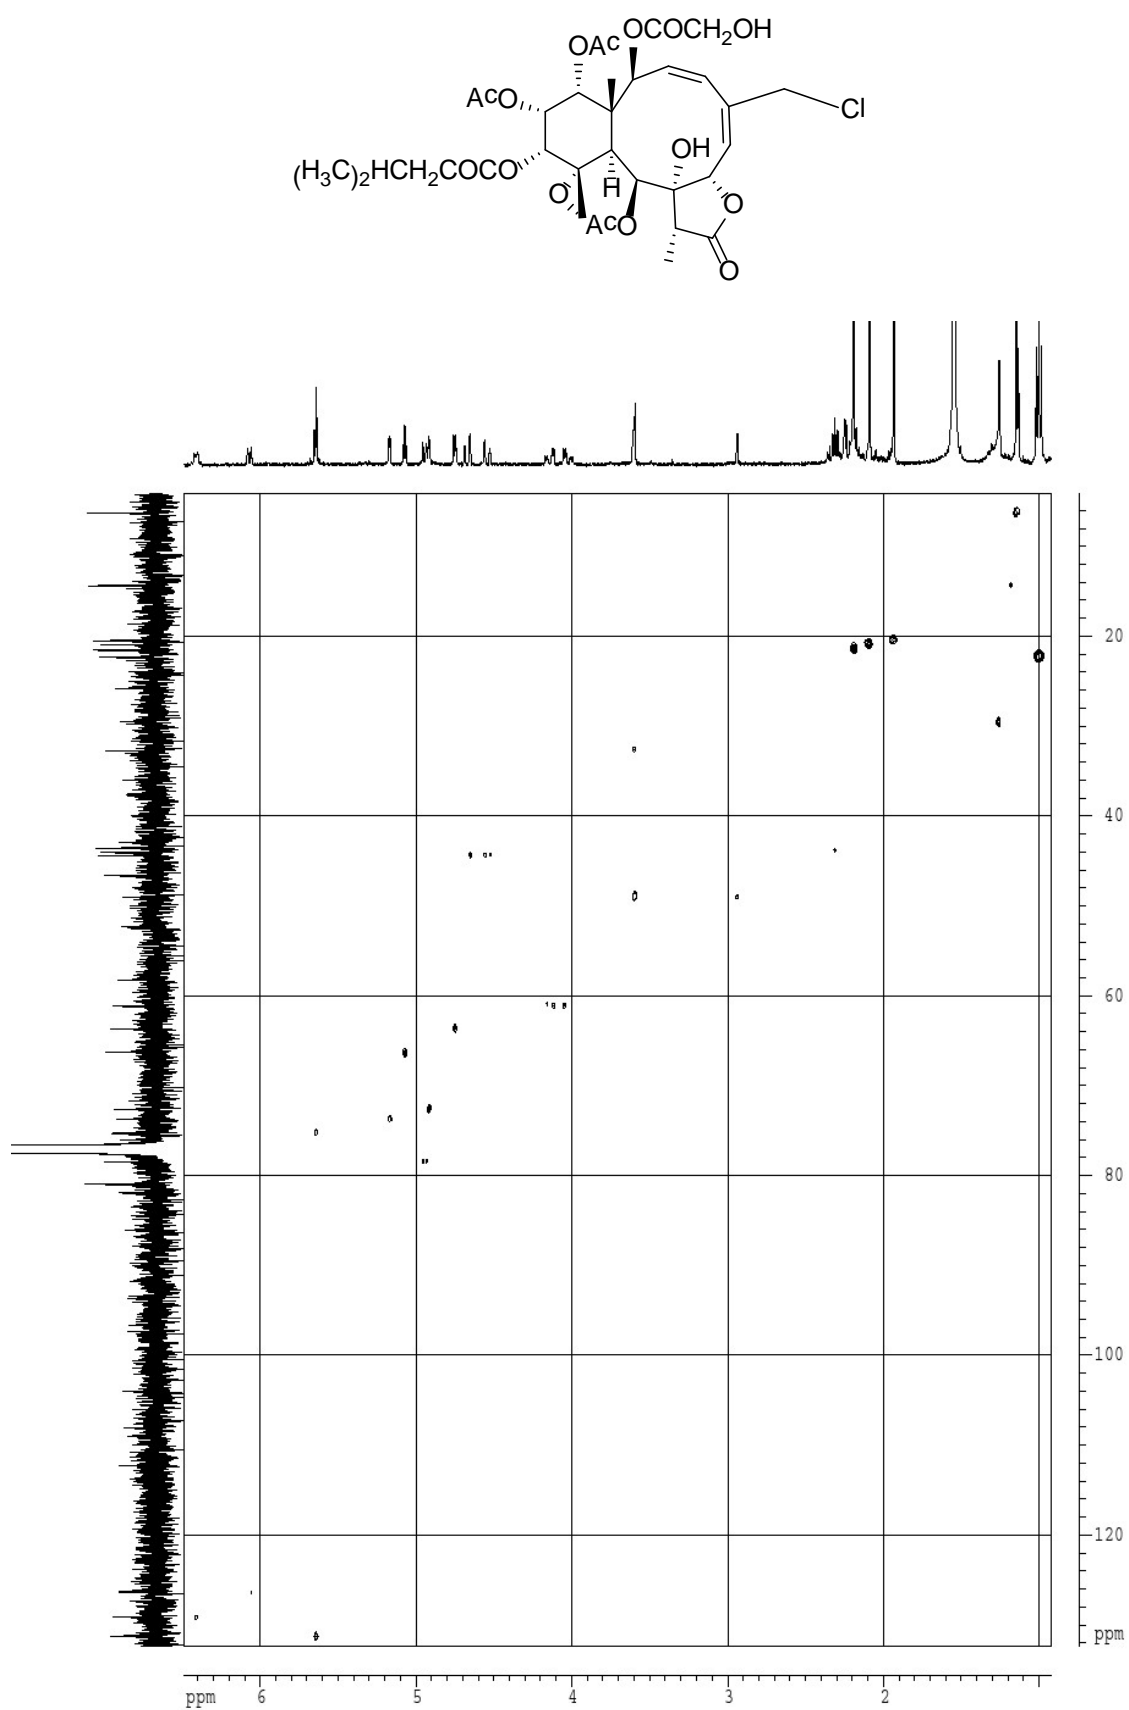

**Figure S29.**  $^1\text{H}$ - $^1\text{H}$  COSY spectrum of the new compound **4**.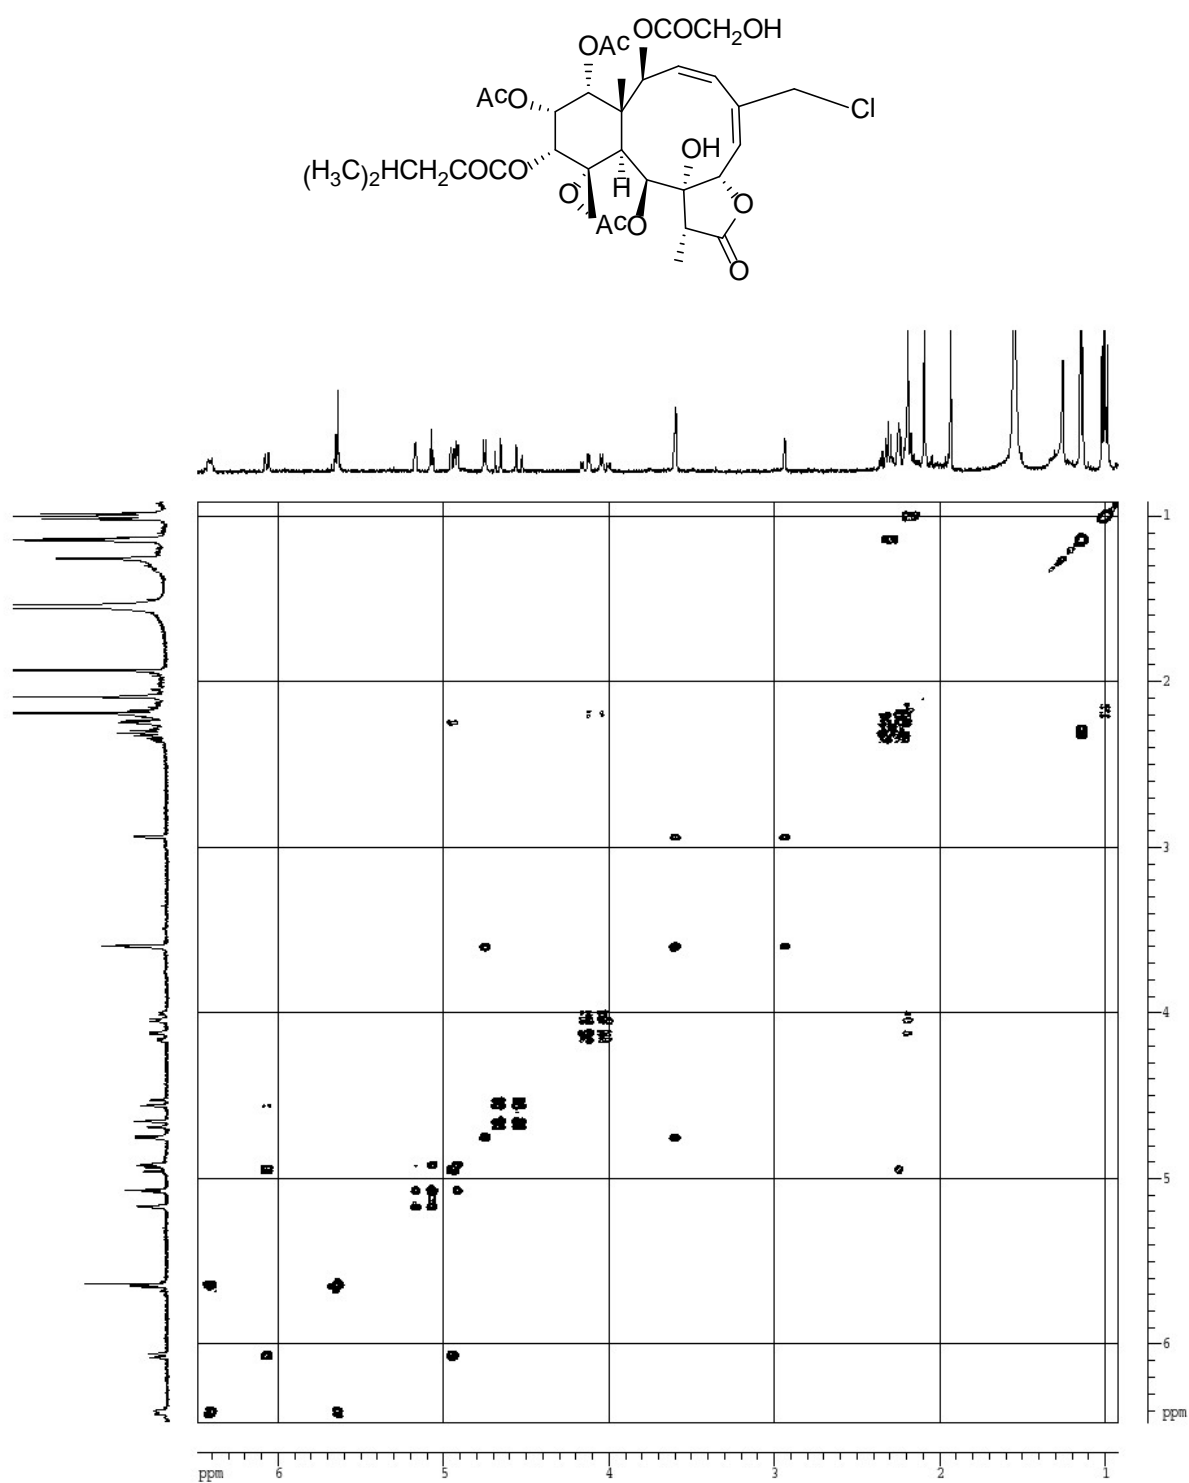

**Figure S30.** HMBC spectrum of the new compound **4**.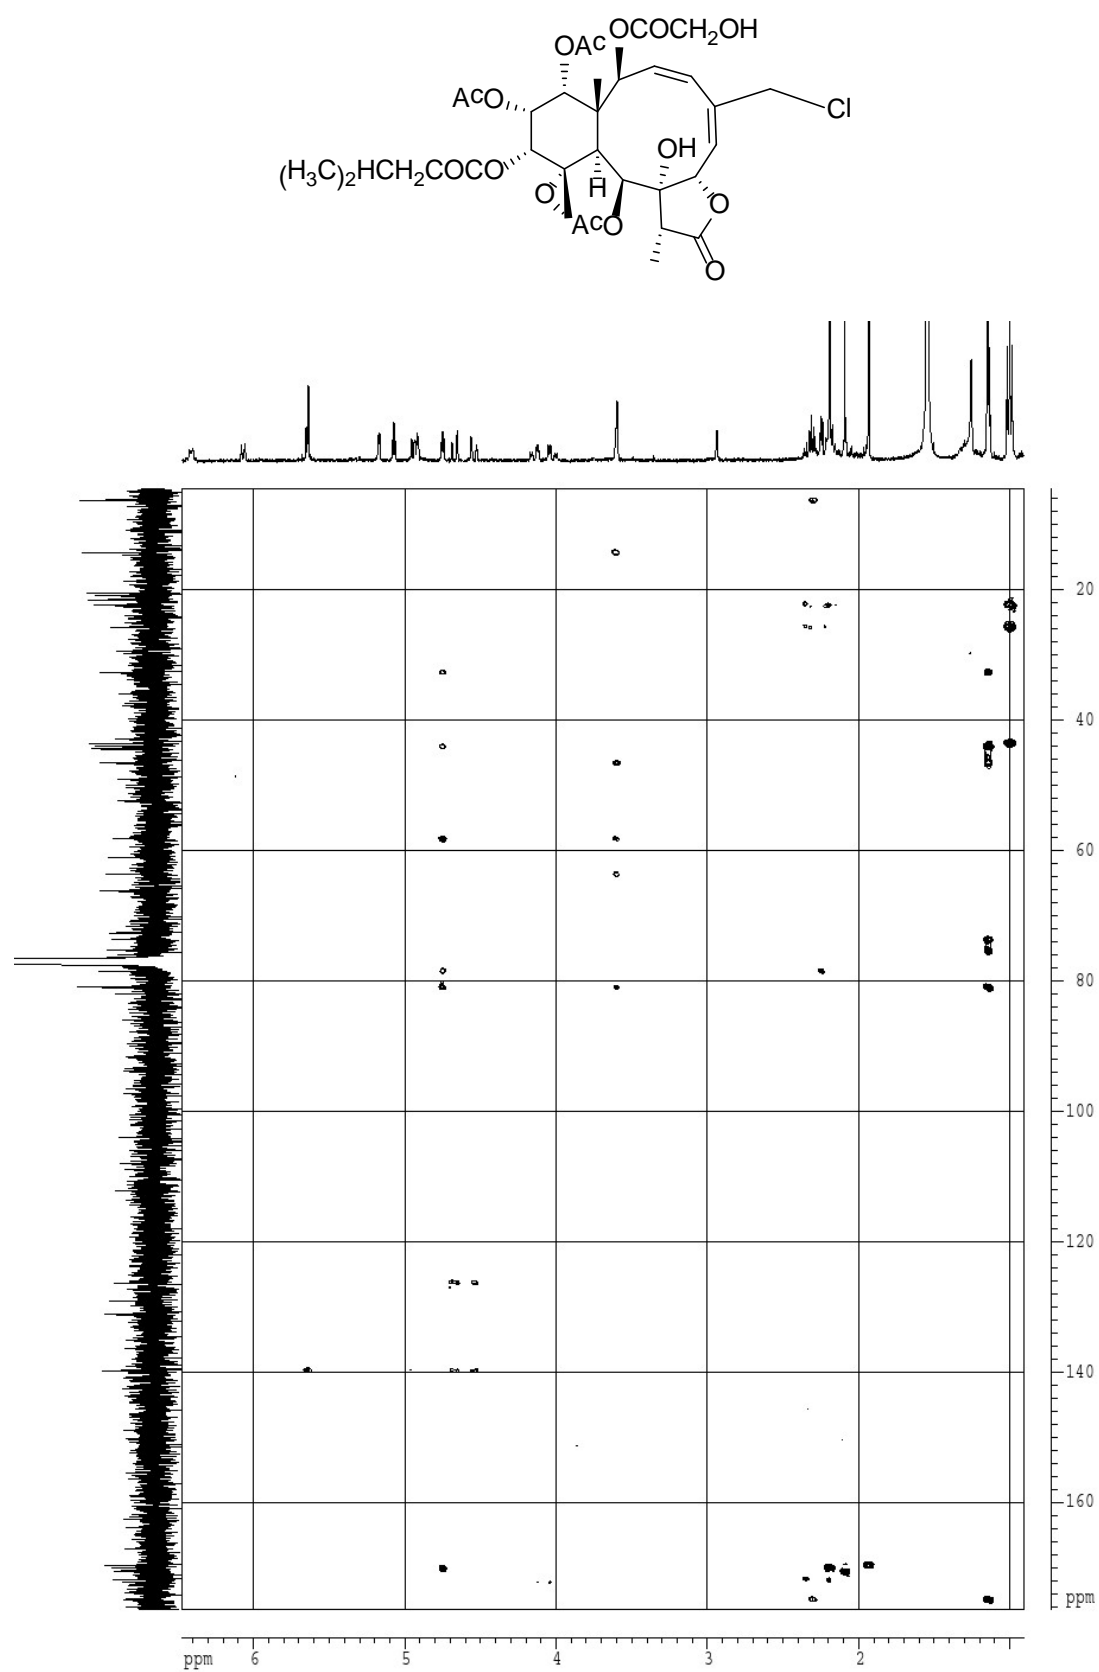



**Figure S31.** NOESY spectrum of the new compound **4**.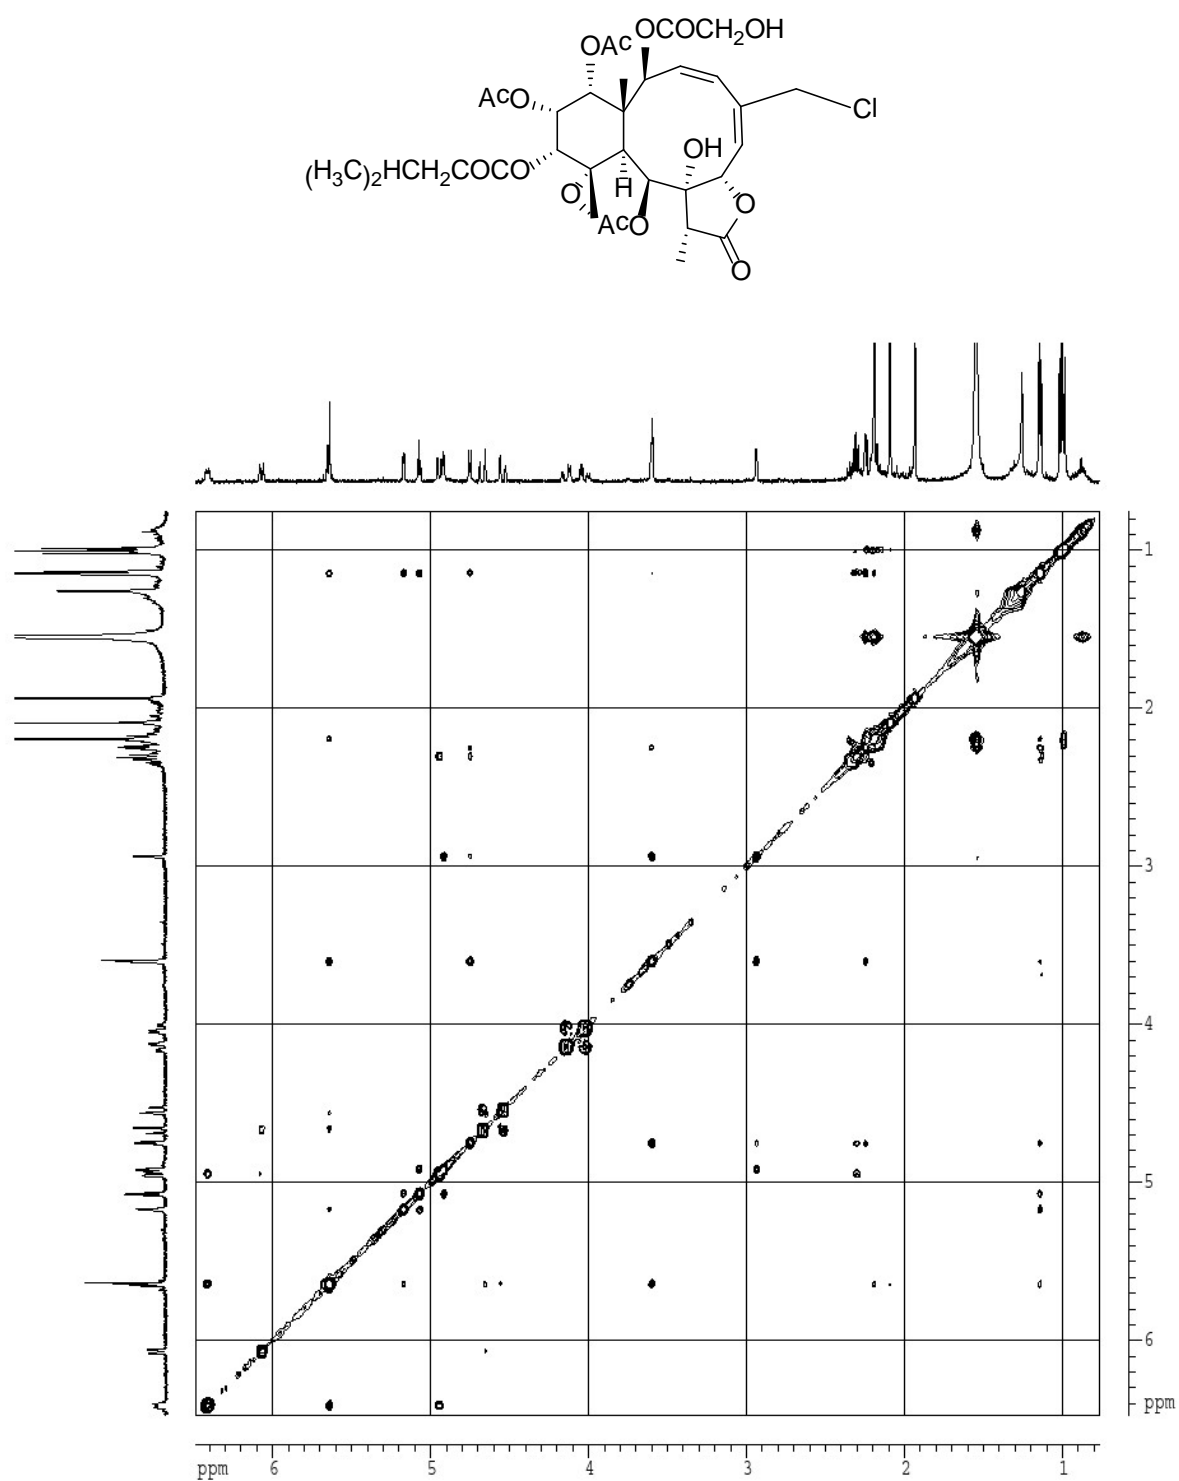

**Figure S32.** HR-ESIMS spectrum of the new compound **5**.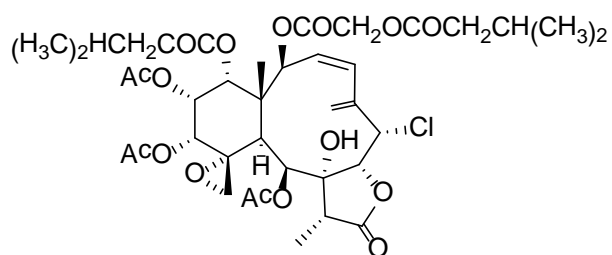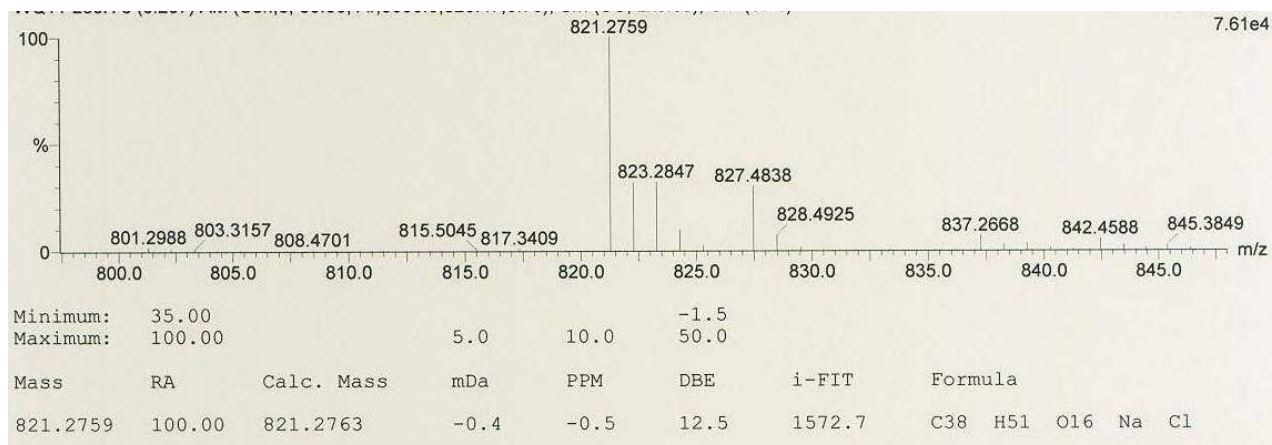

**Figure S33.**  $^1\text{H}$  NMR spectrum of the new compound **5**.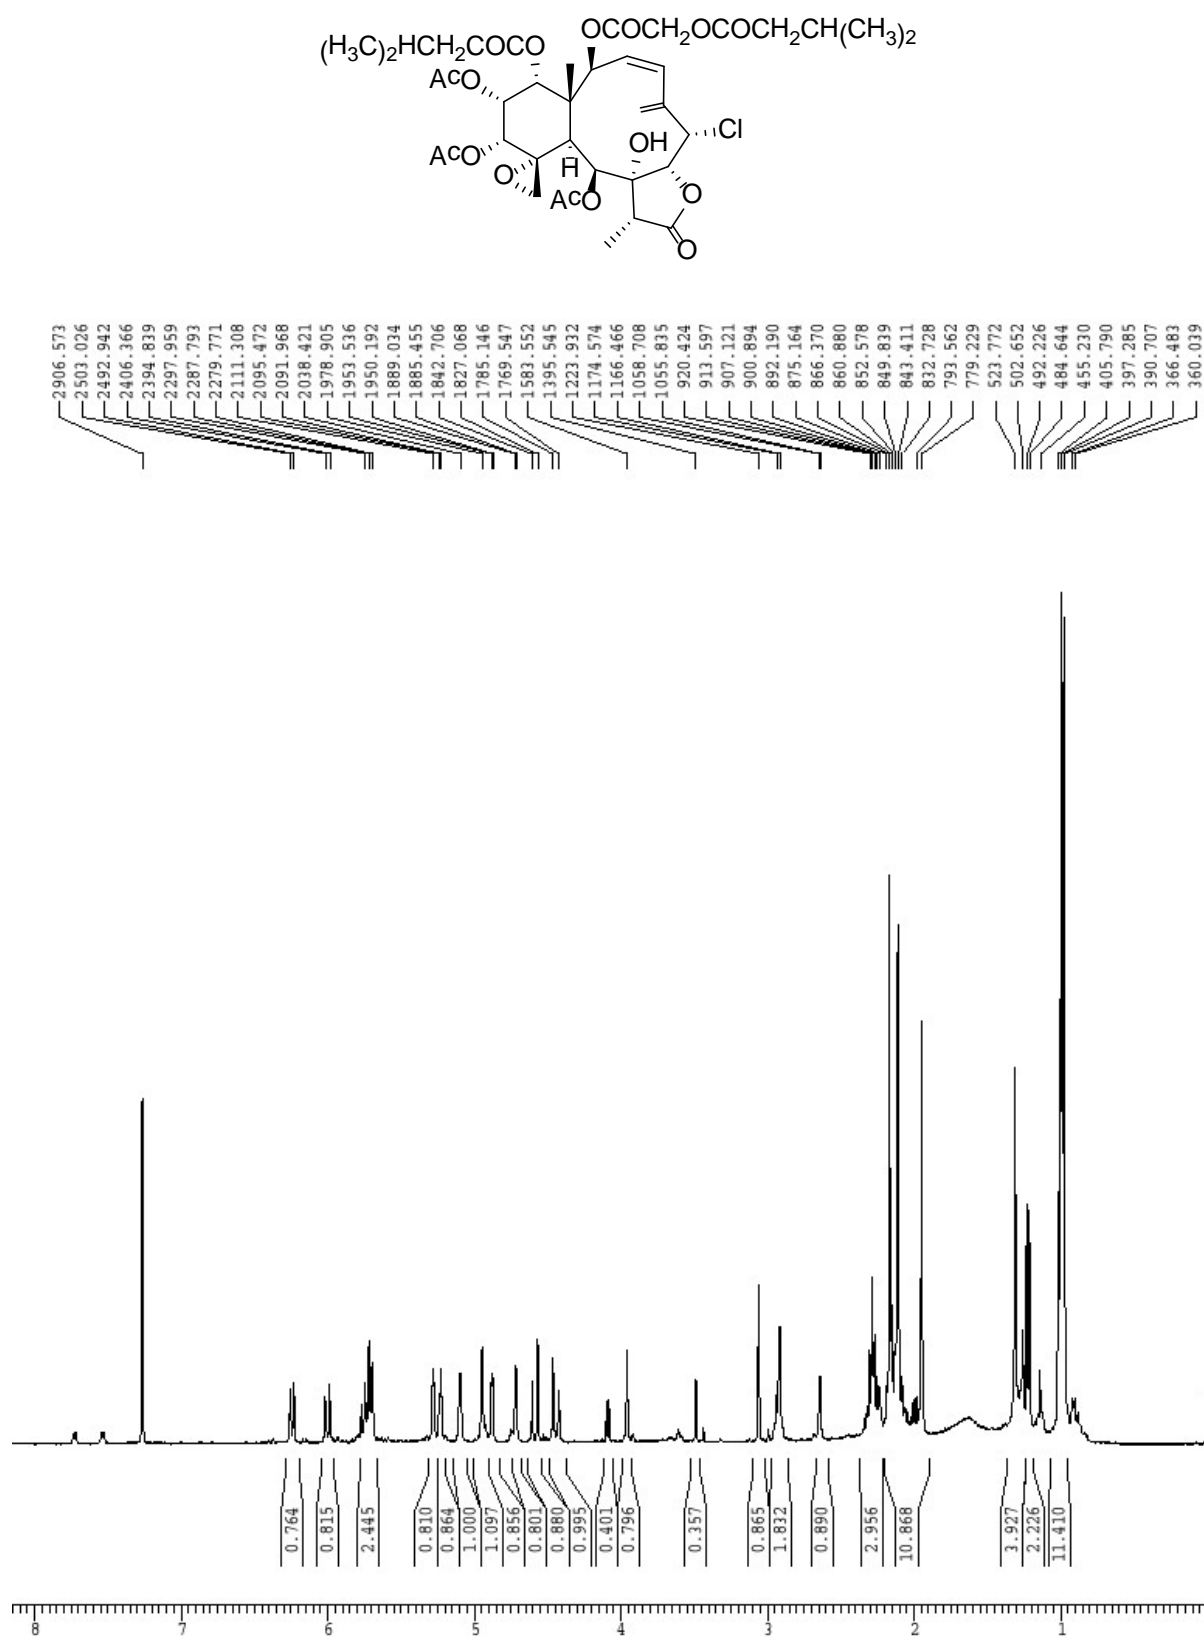

**Figure S34.**  $^{13}\text{C}$  NMR spectrum of the new compound **5**.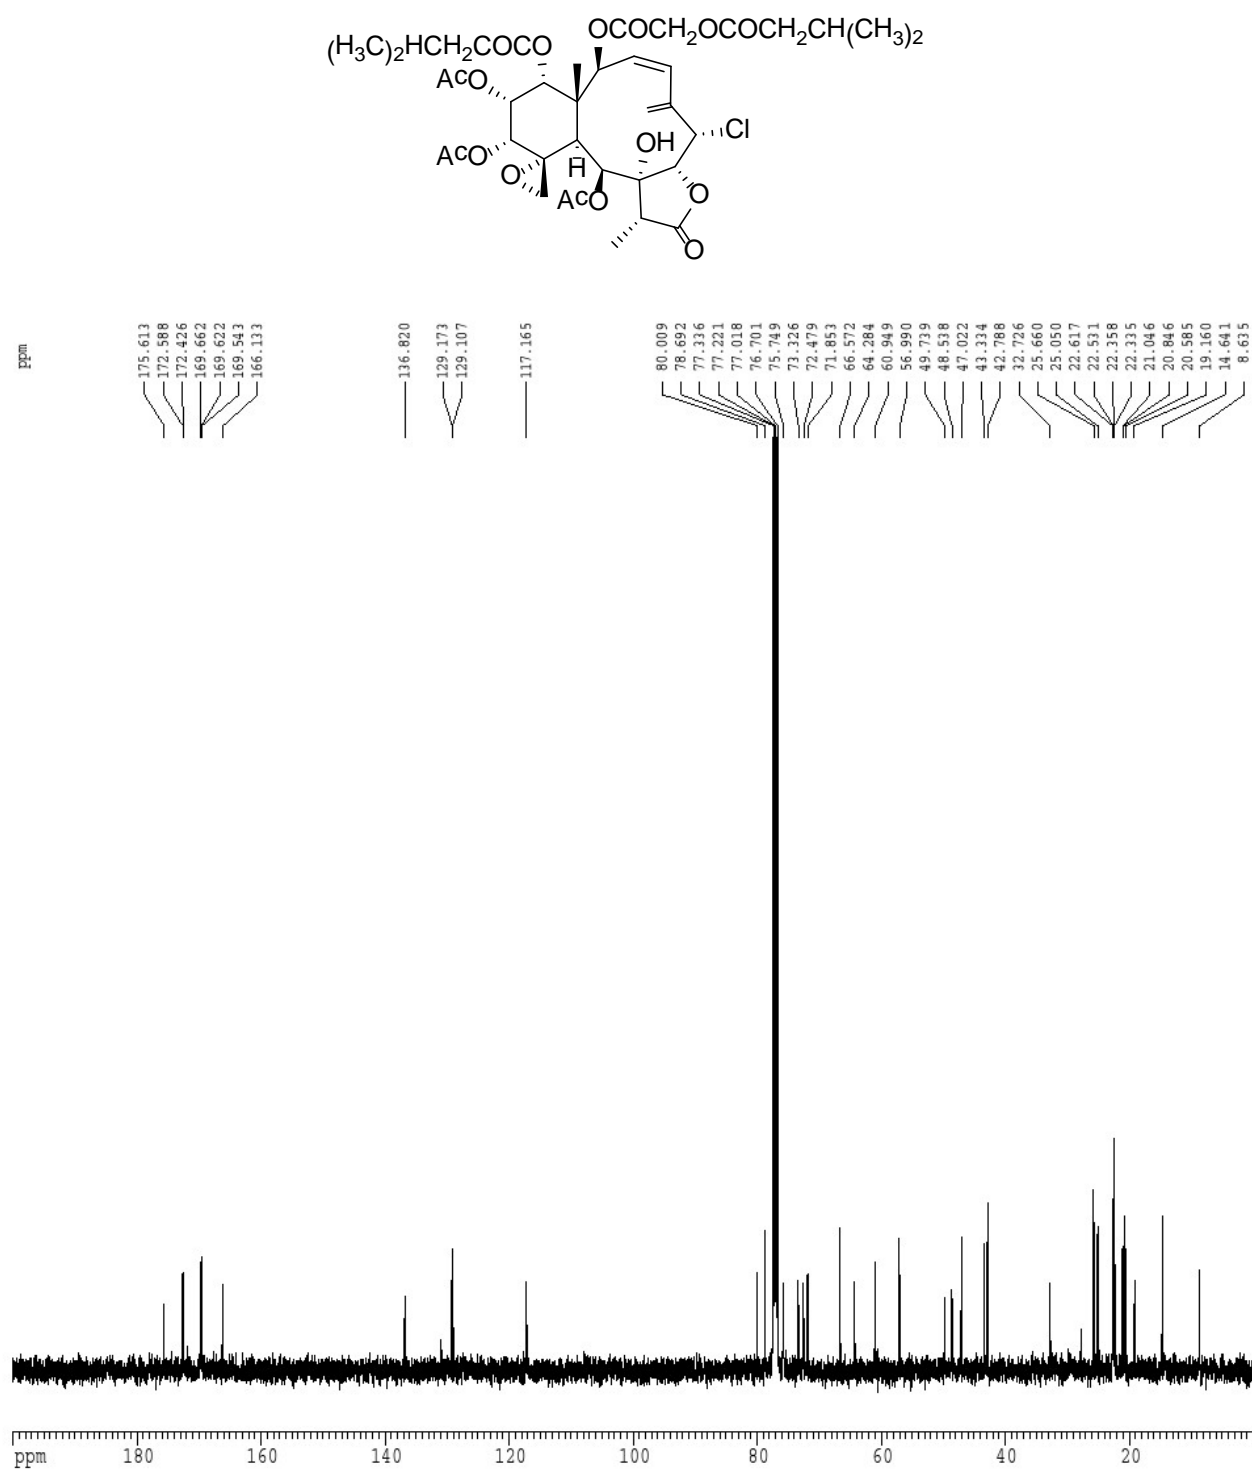

**Figure S35.** DEPT spectrum of the new compound **5**.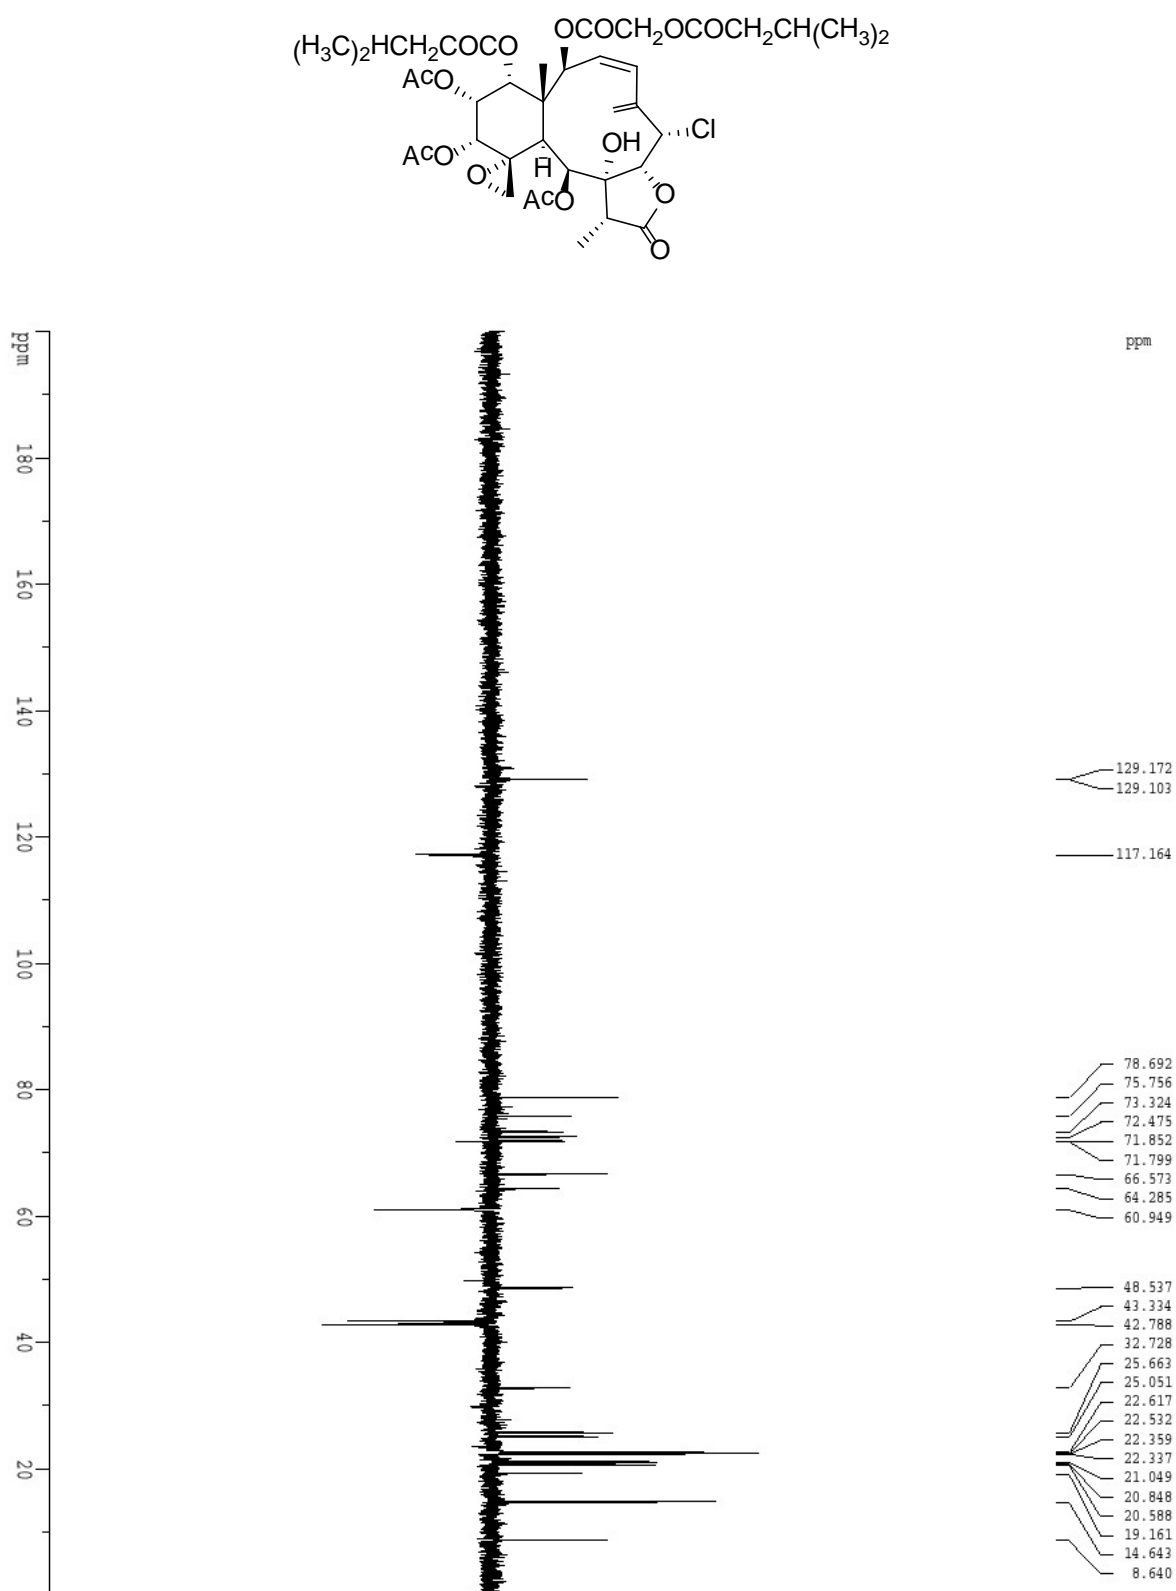

**Figure S36.** HSQC spectrum of the new compound **5**.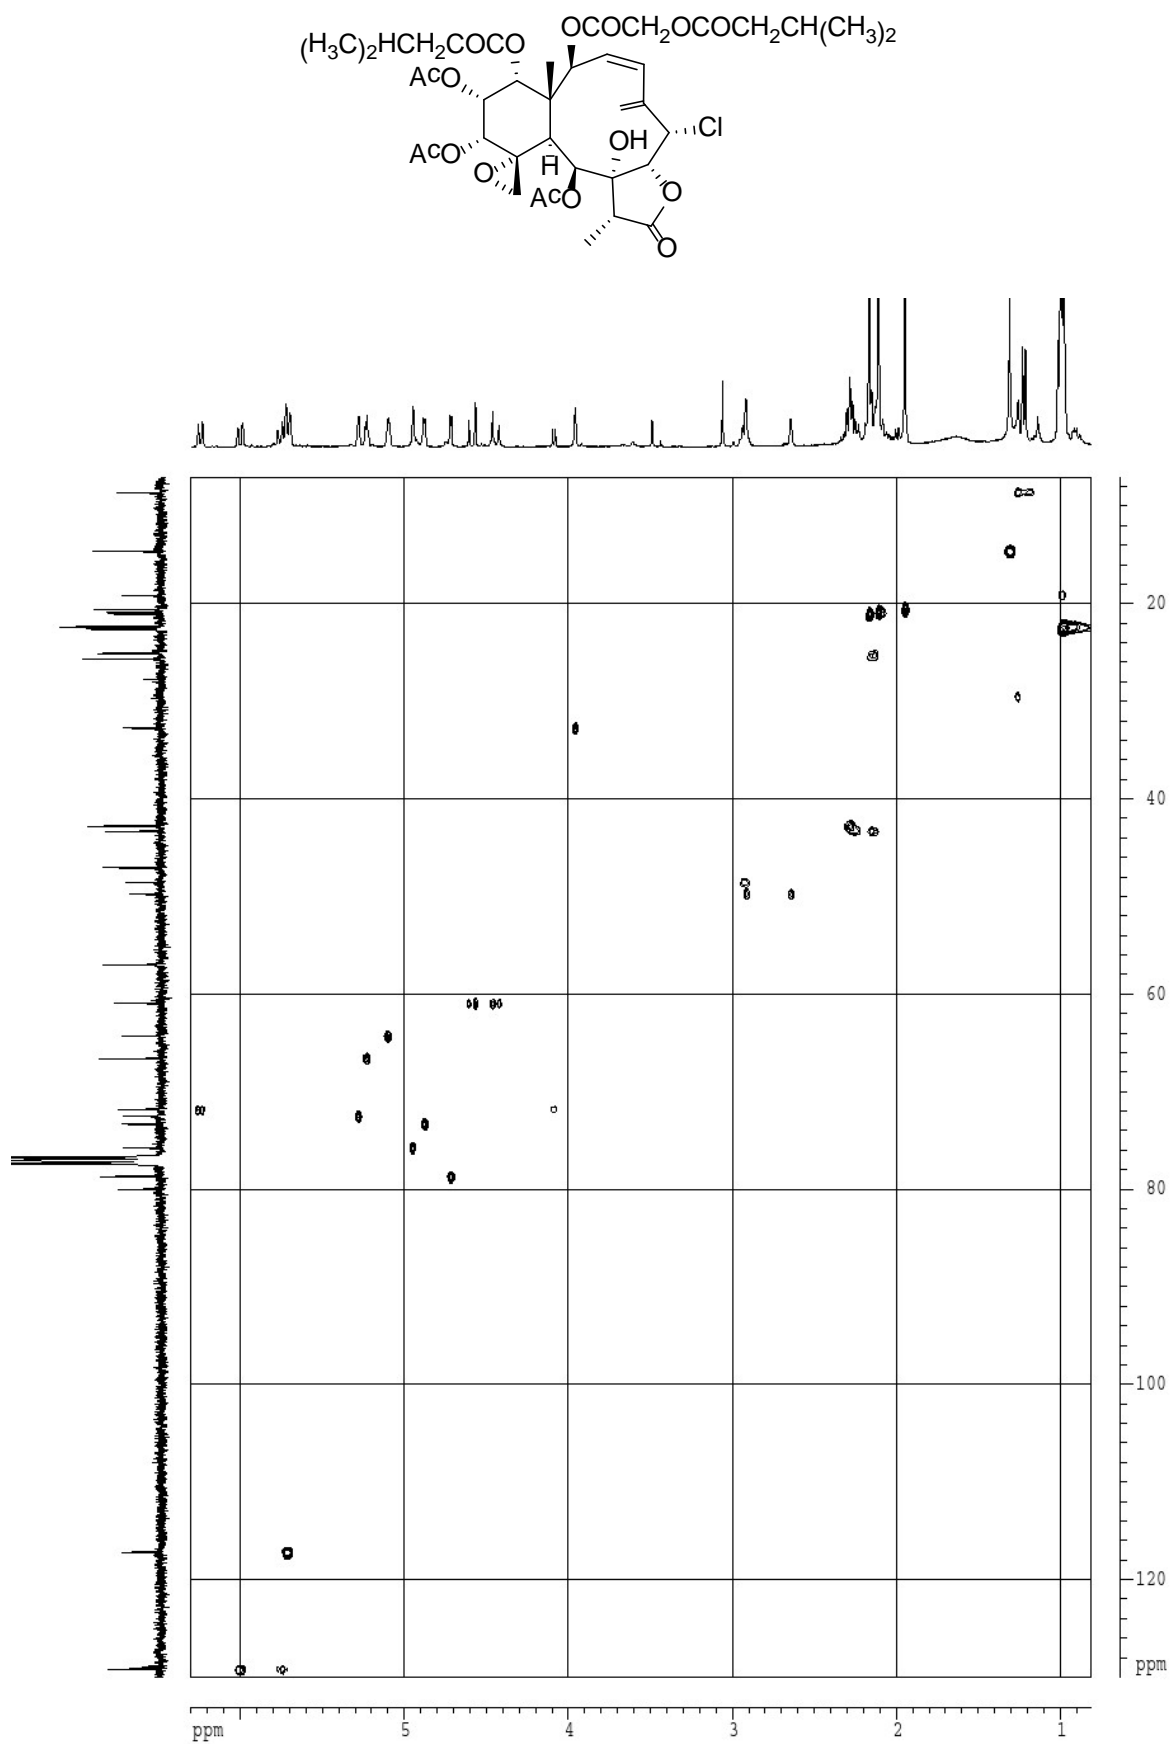

**Figure S37.**  $^1\text{H}$ - $^1\text{H}$  COSY spectrum of the new compound **5**.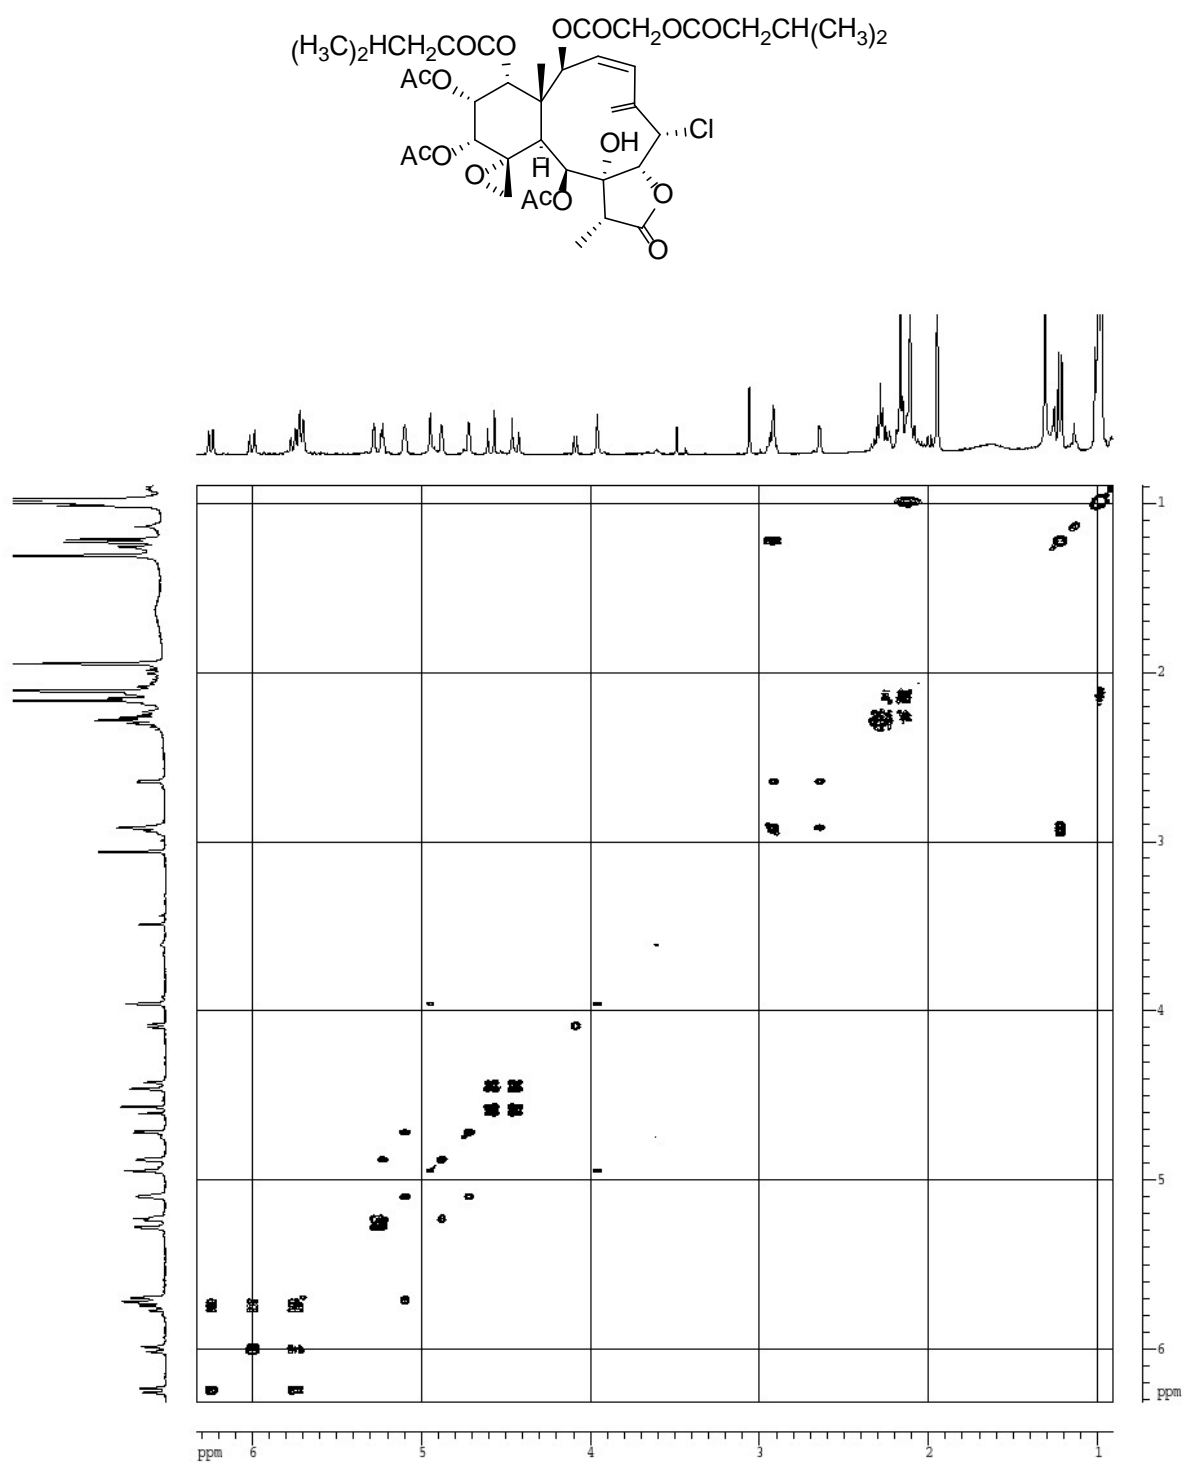

**Figure S38.** HMBC spectrum of the new compound **5**.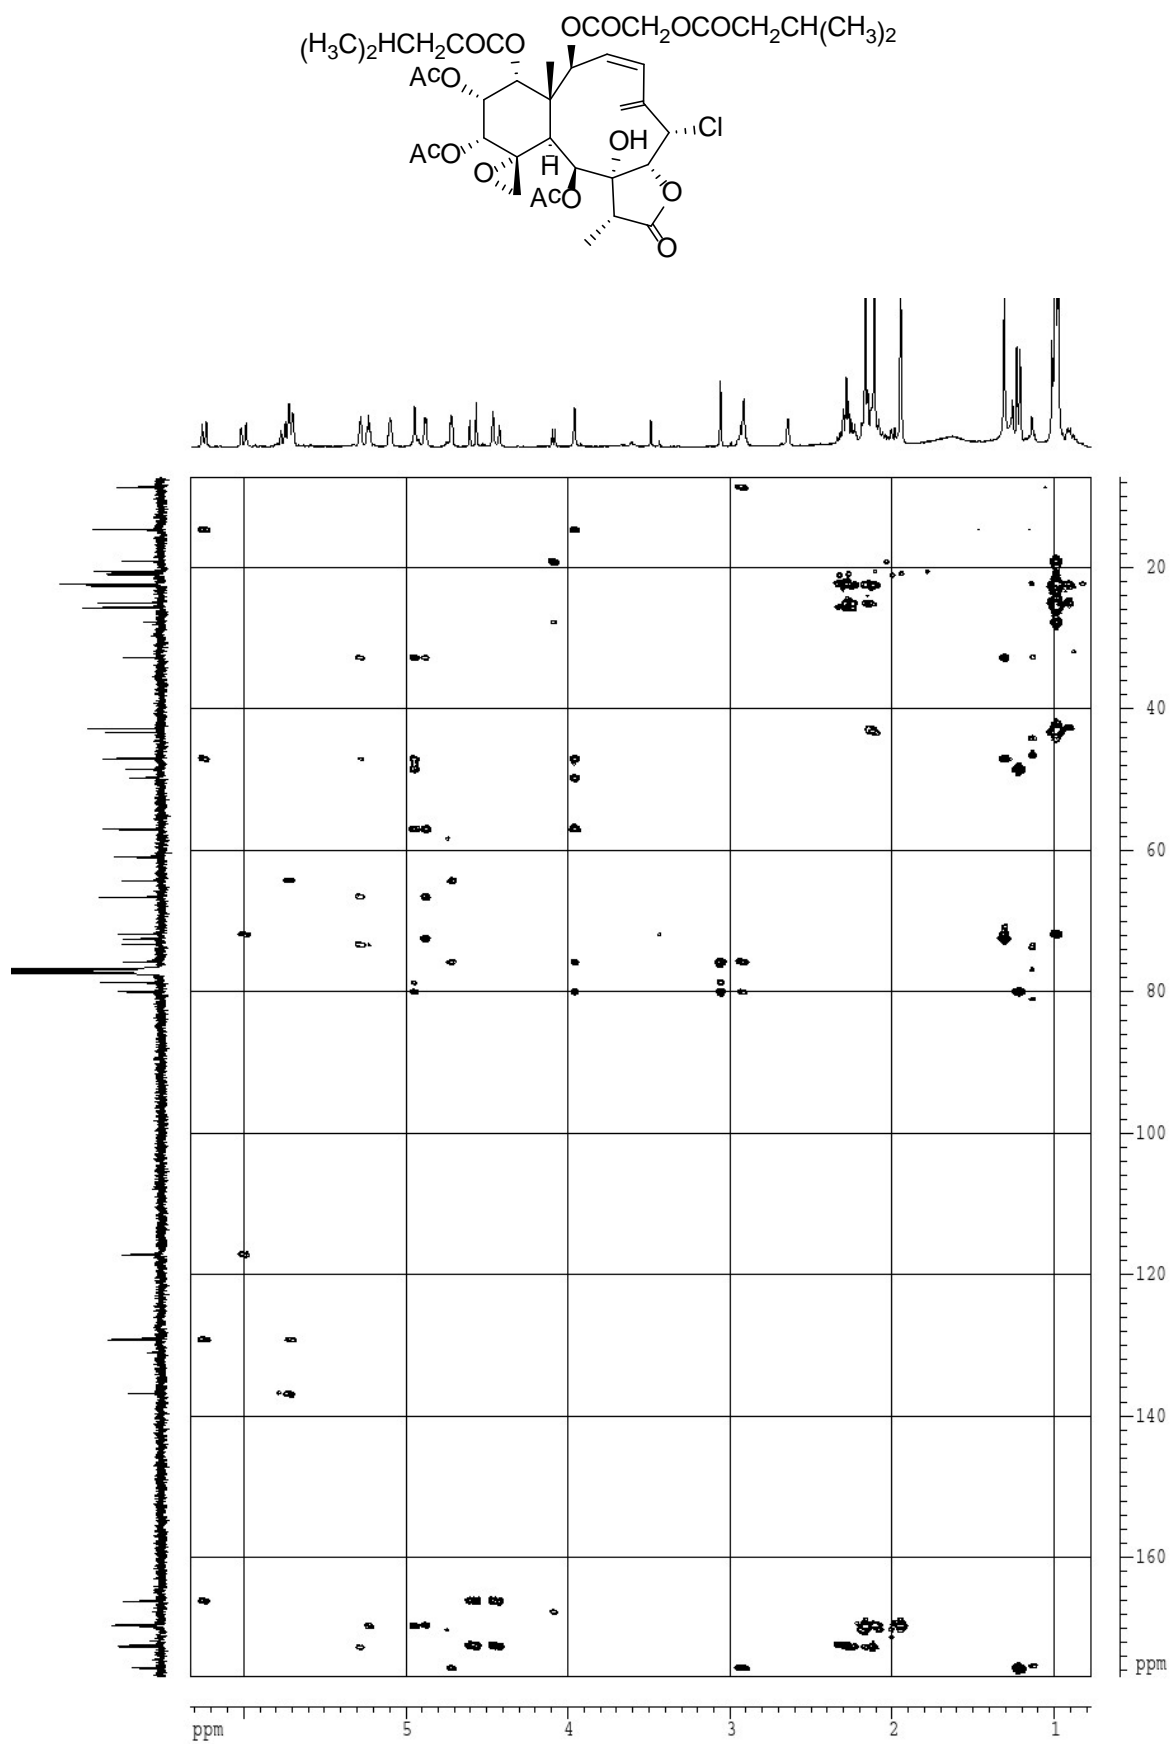



**Figure S39.** NOESY spectrum of the new compound **5**.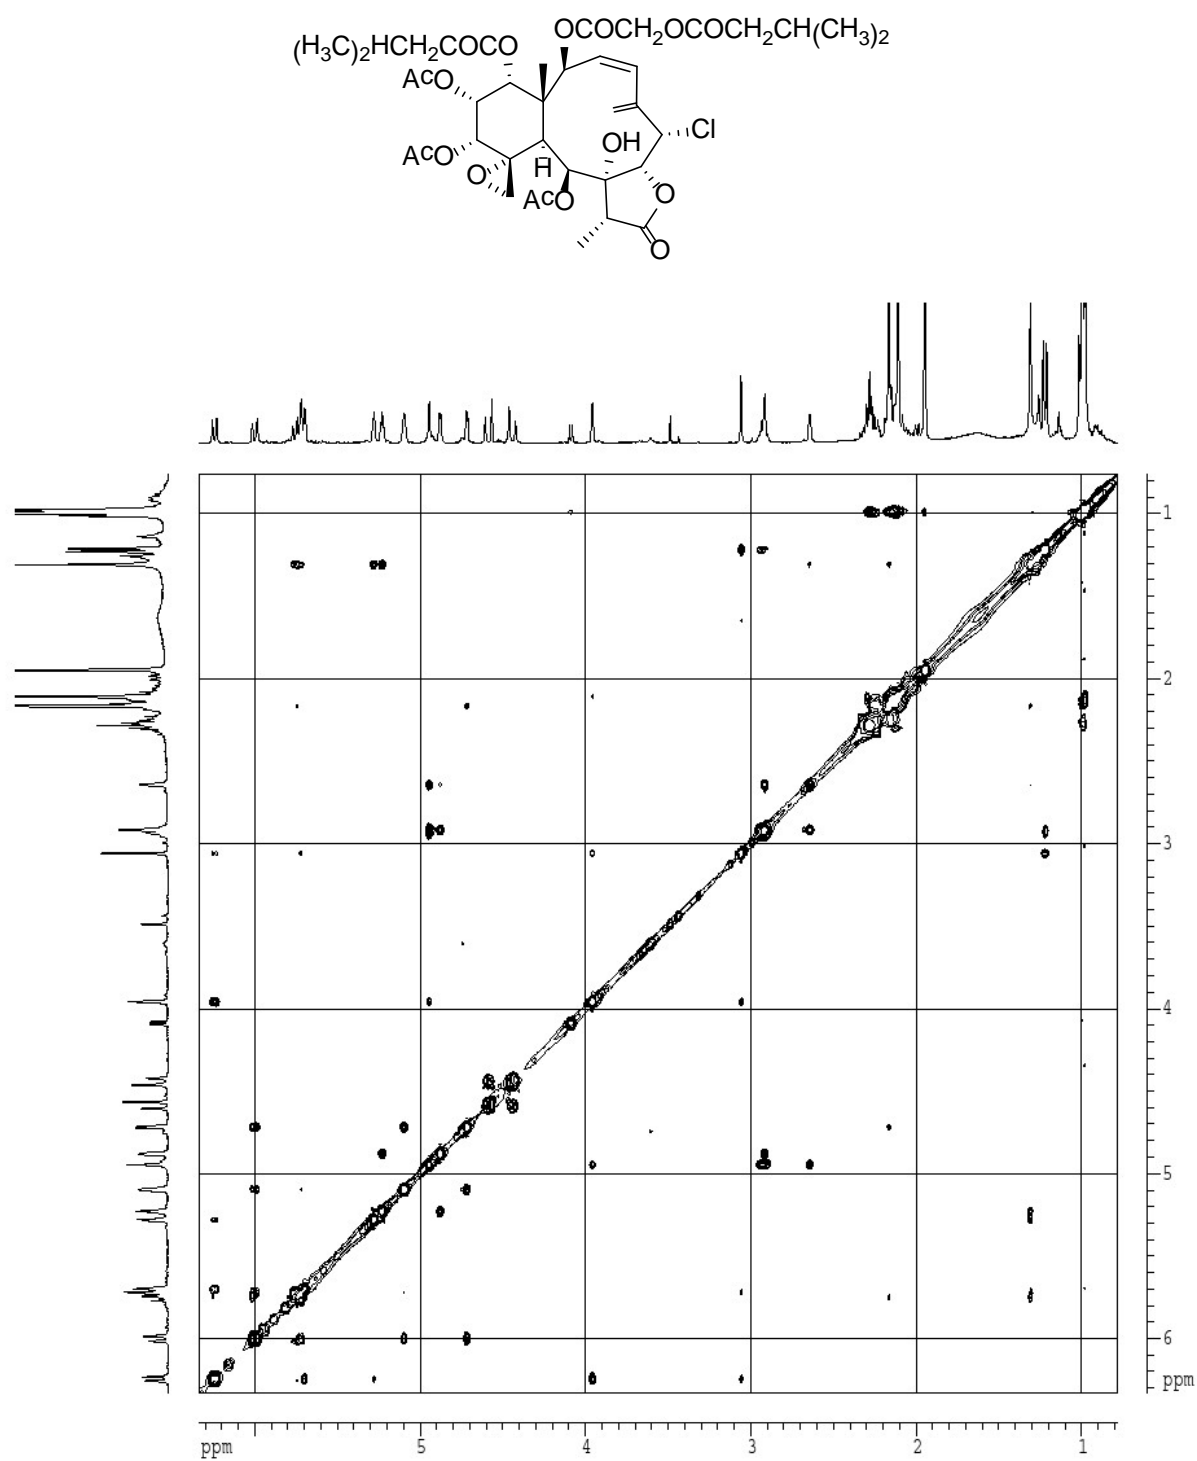

**Figure S40.** HR-ESIMS spectrum of the new compound **6**.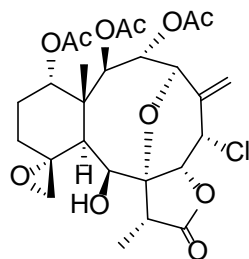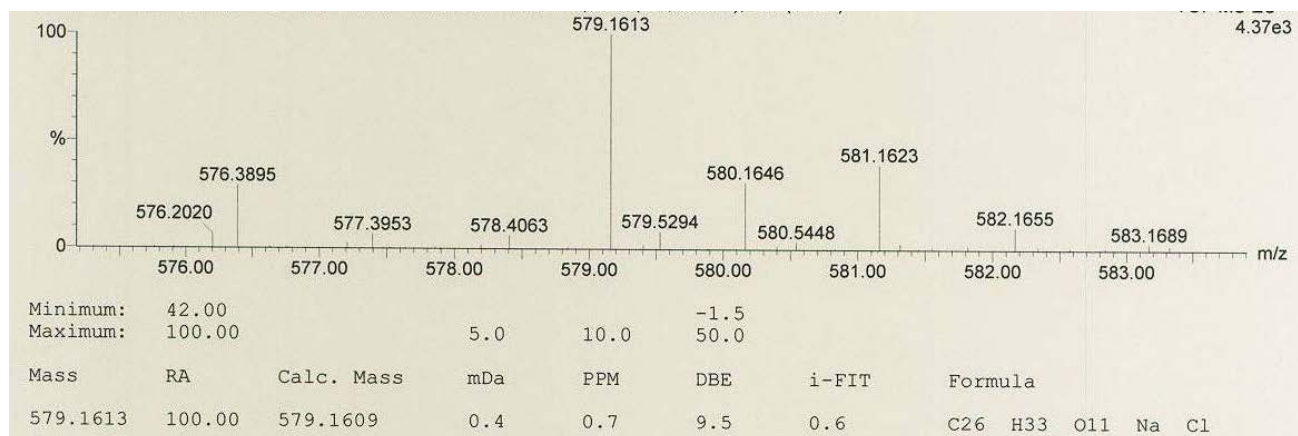

**Figure S41.**  $^1\text{H}$  NMR spectrum of the new compound **6**.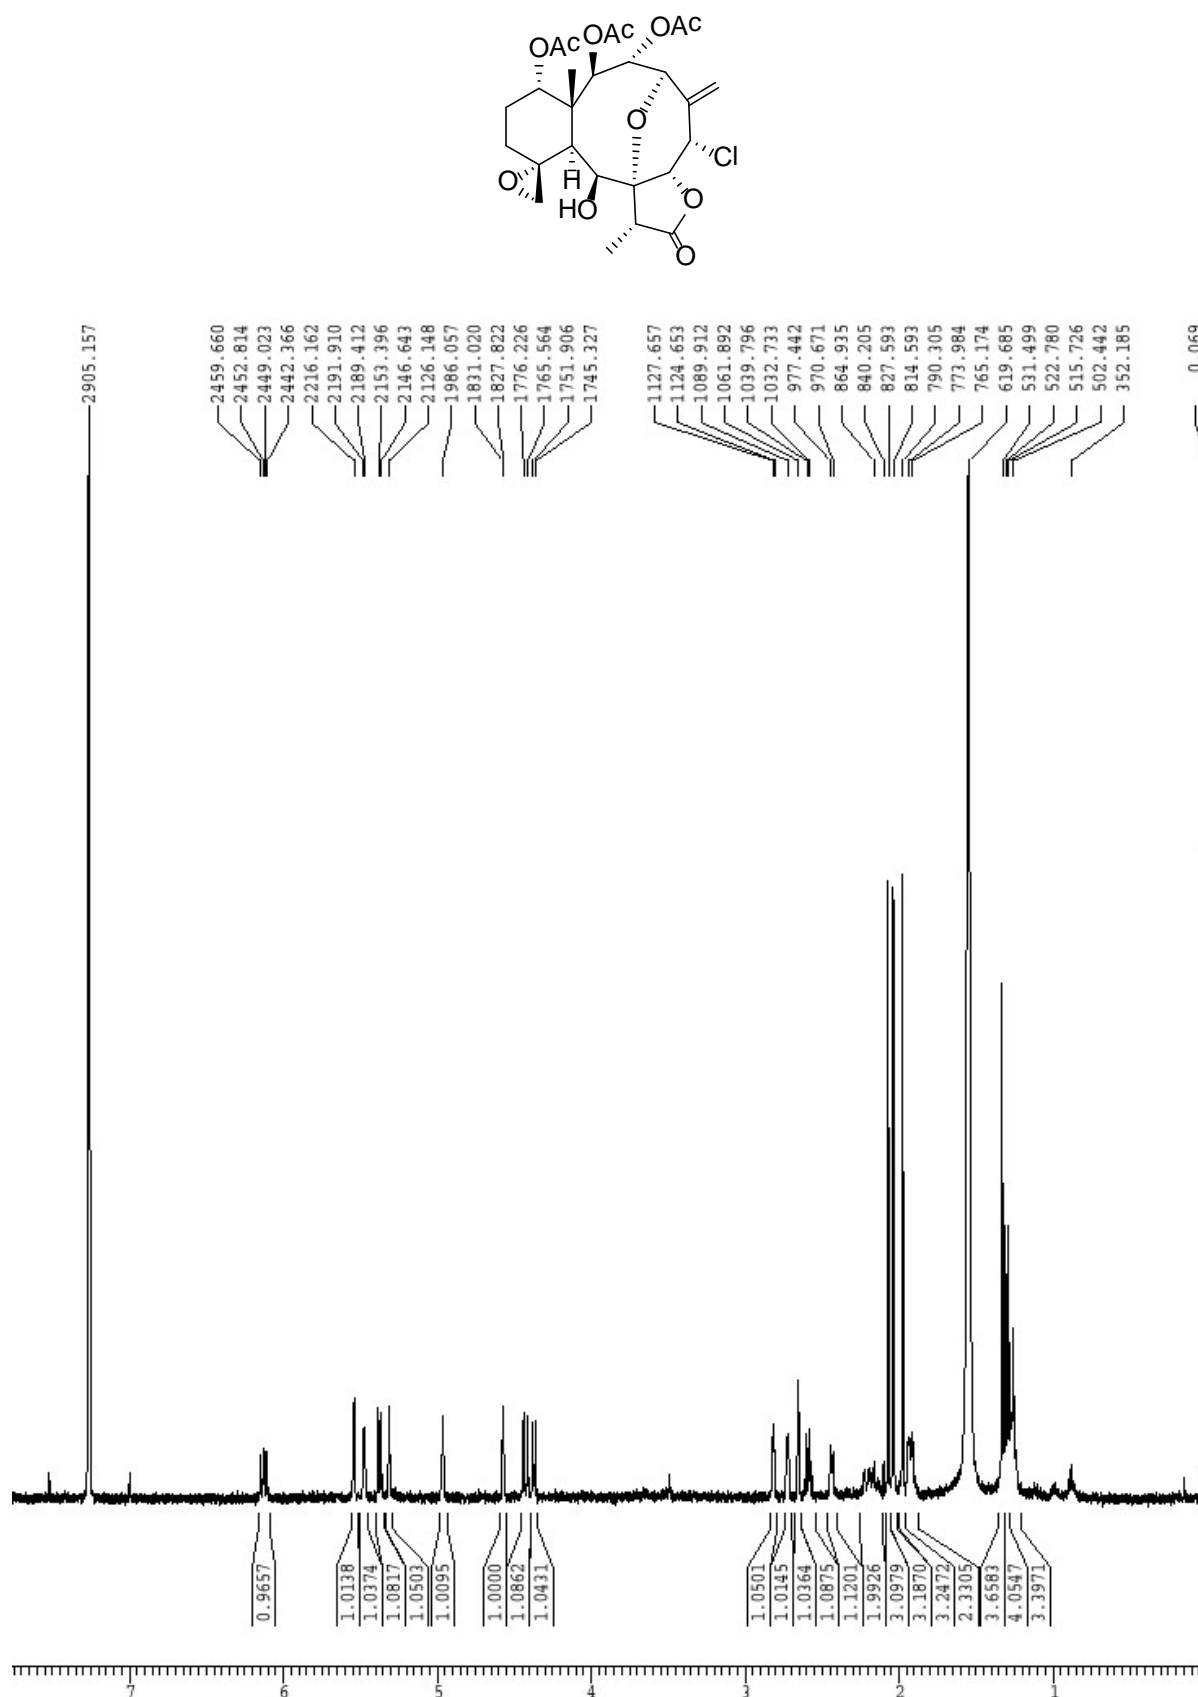

**Figure S42.**  $^{13}\text{C}$  NMR spectrum of the new compound **6**.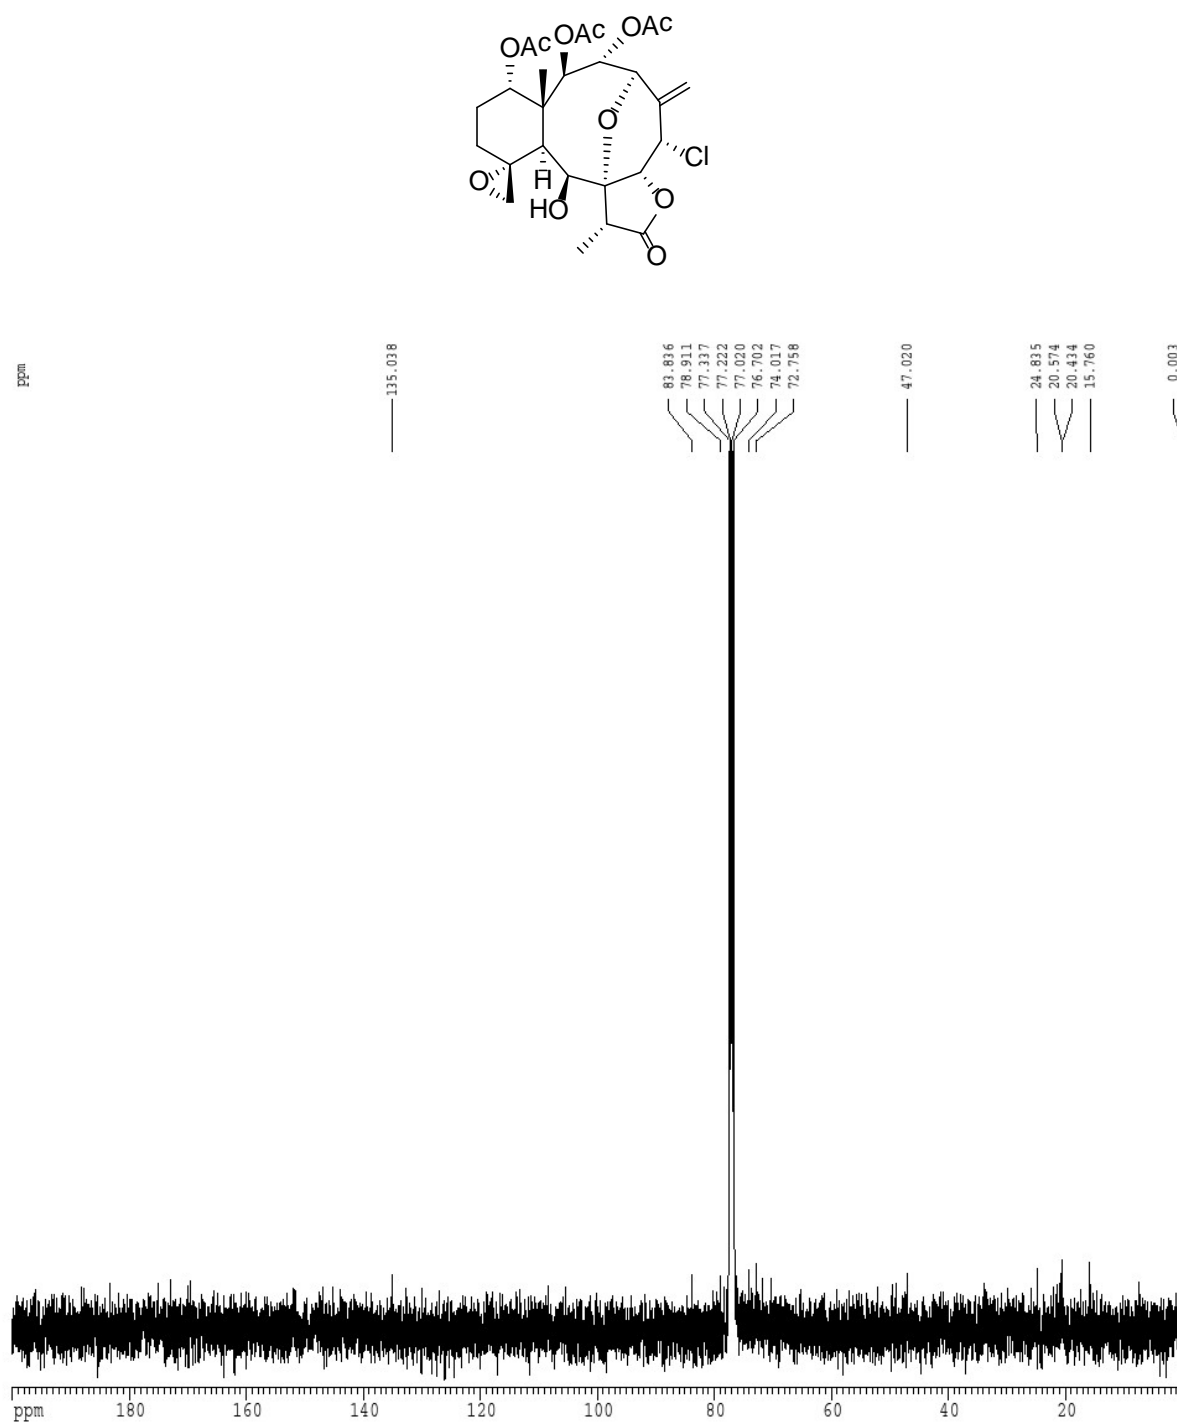

**Figure S43.** DEPT spectrum of the new compound **6**.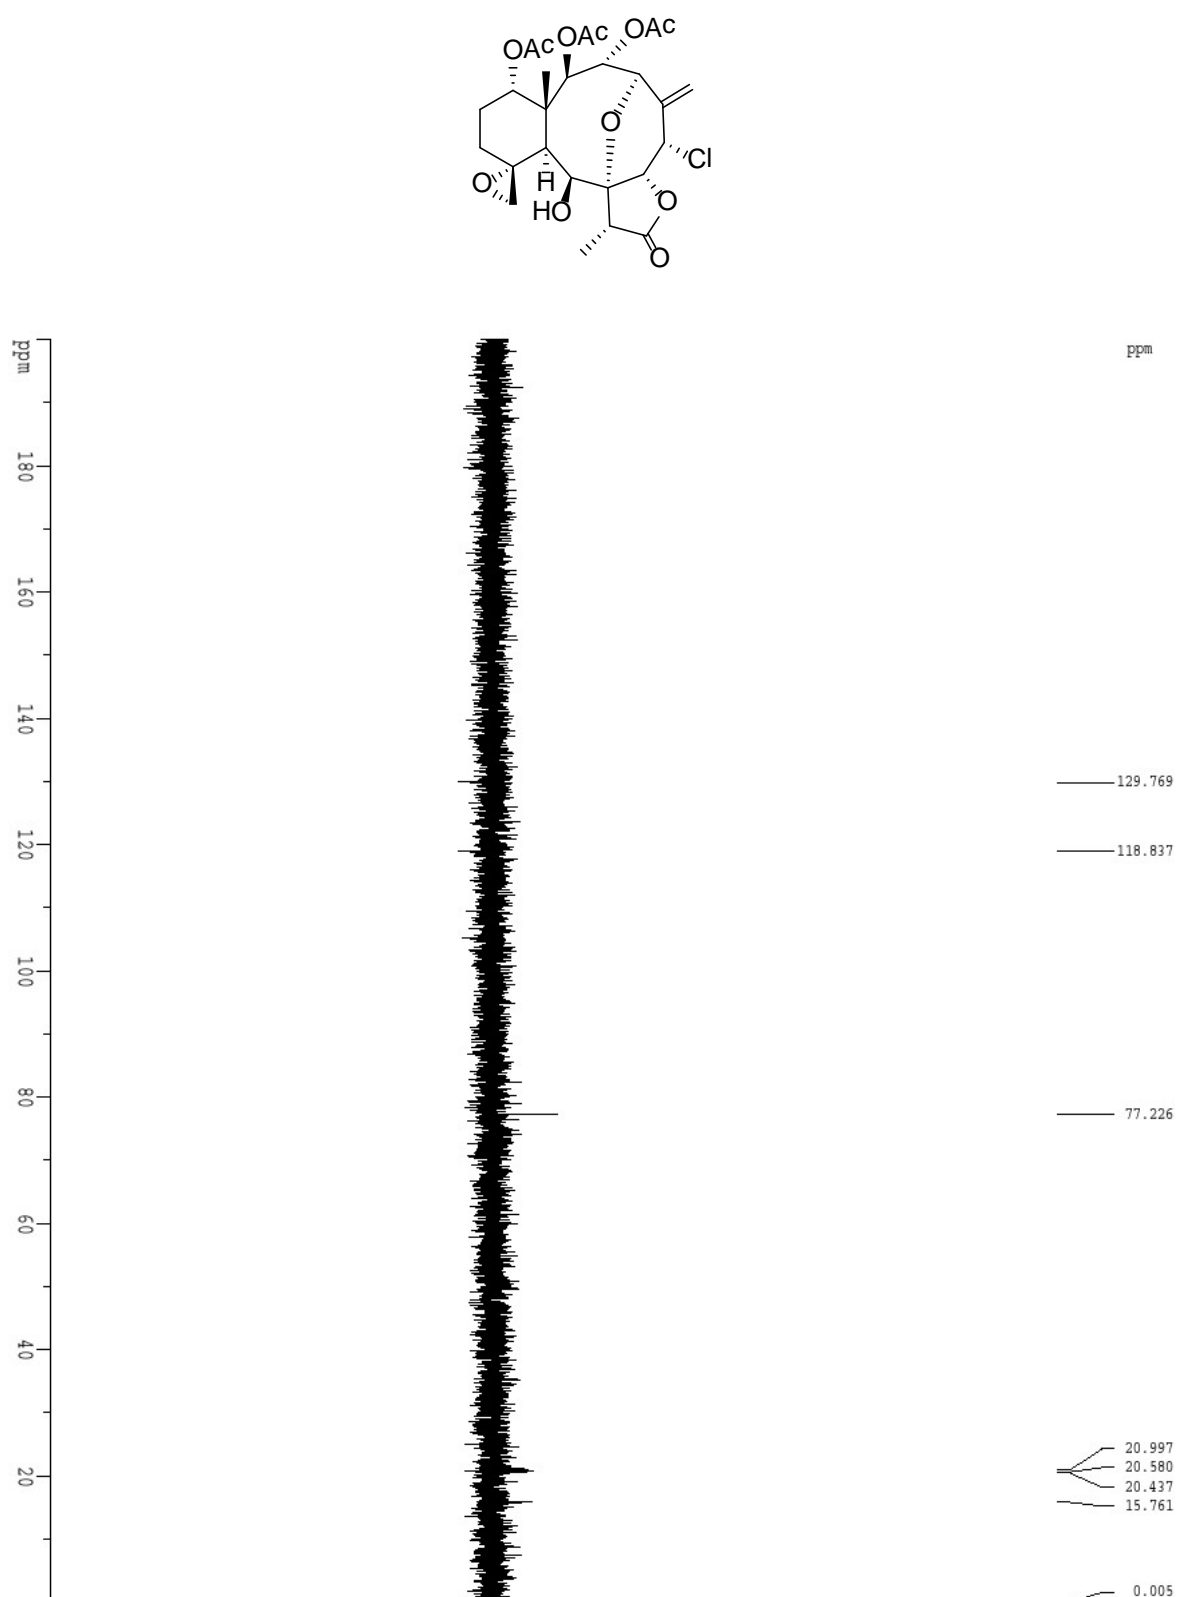

**Figure S44.** HSQC spectrum of the new compound **6**.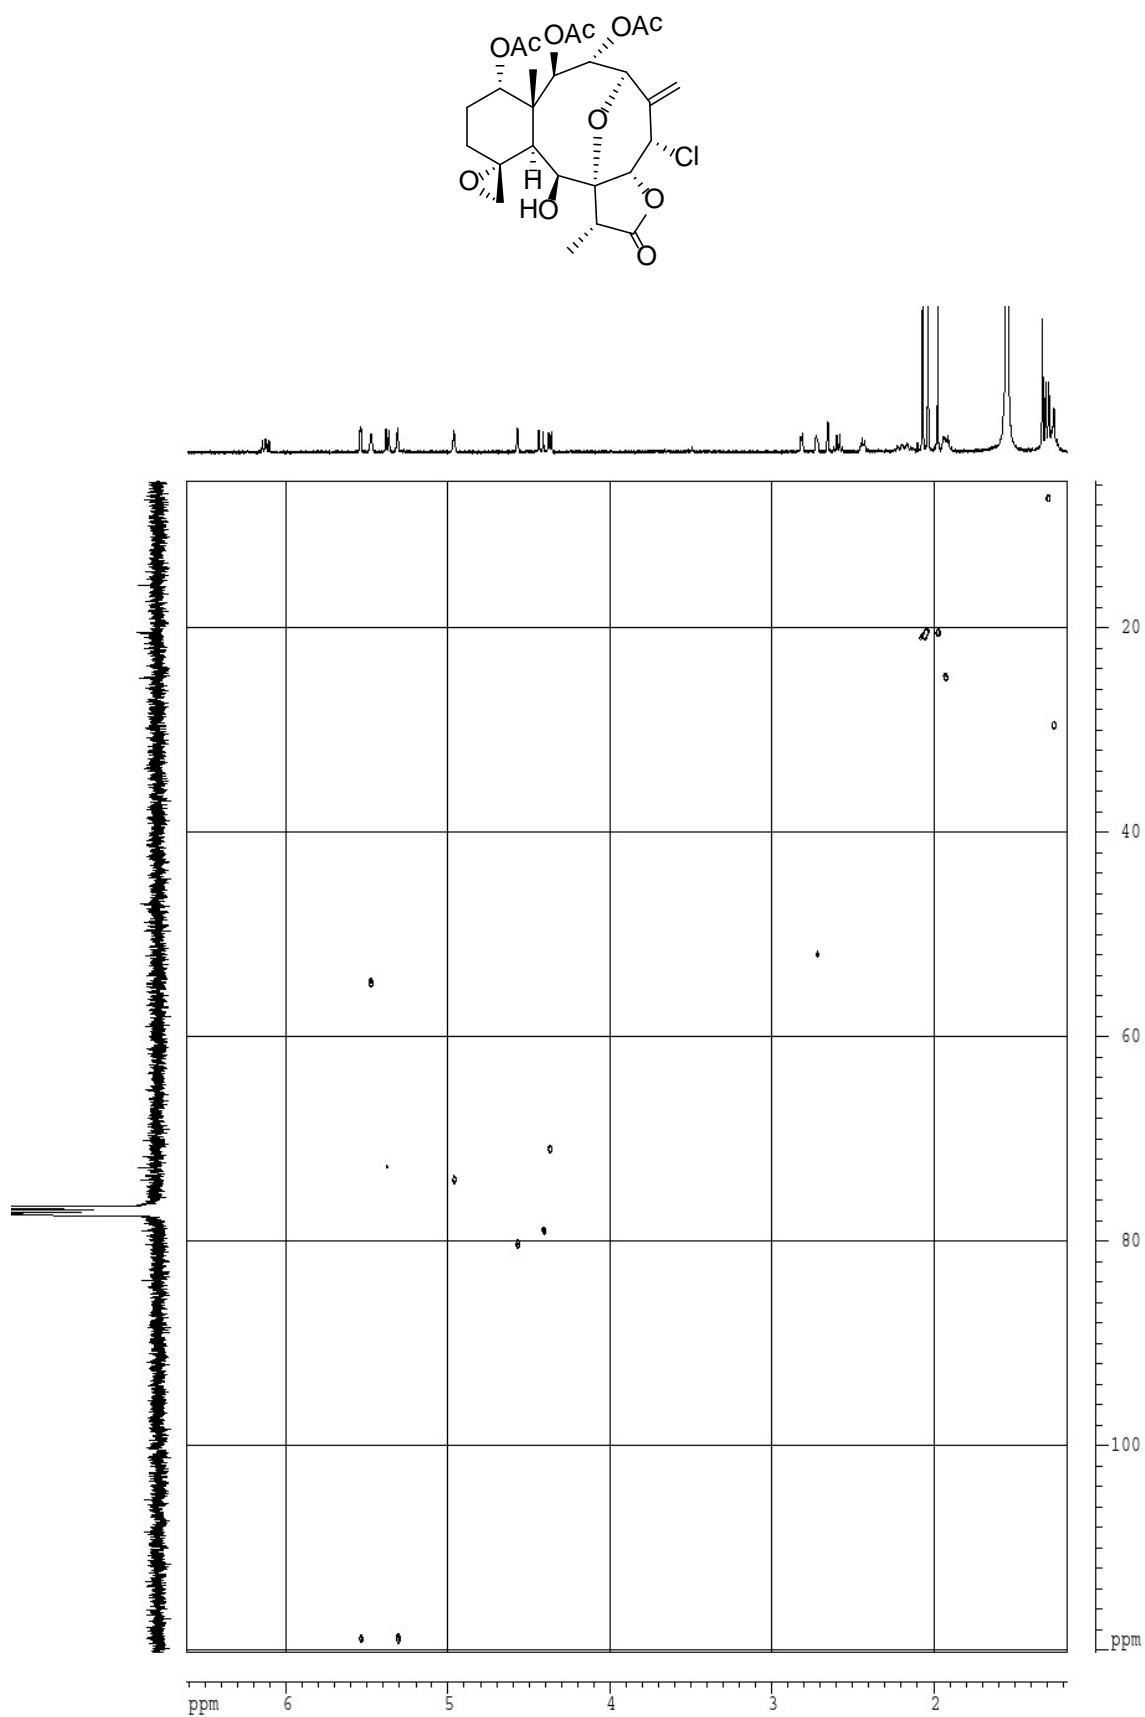

**Figure S45.**  $^1\text{H}$ - $^1\text{H}$  COSY spectrum of the new compound **6**.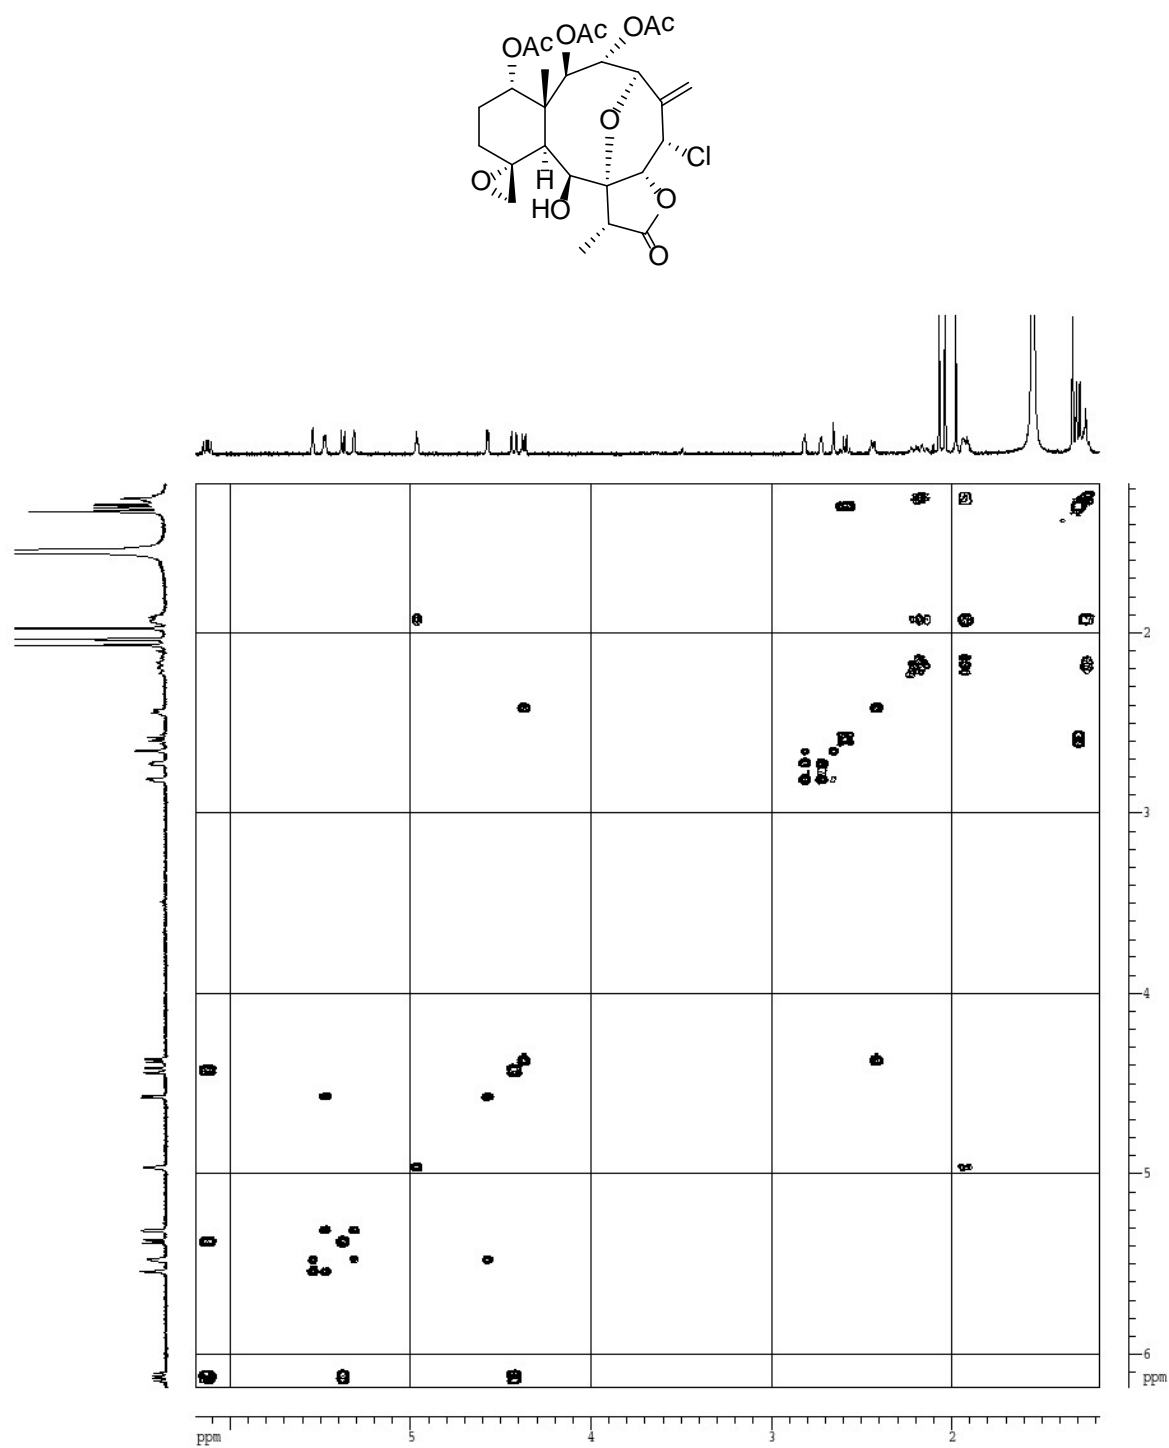

**Figure S46.** HMBC spectrum of the new compound **6**.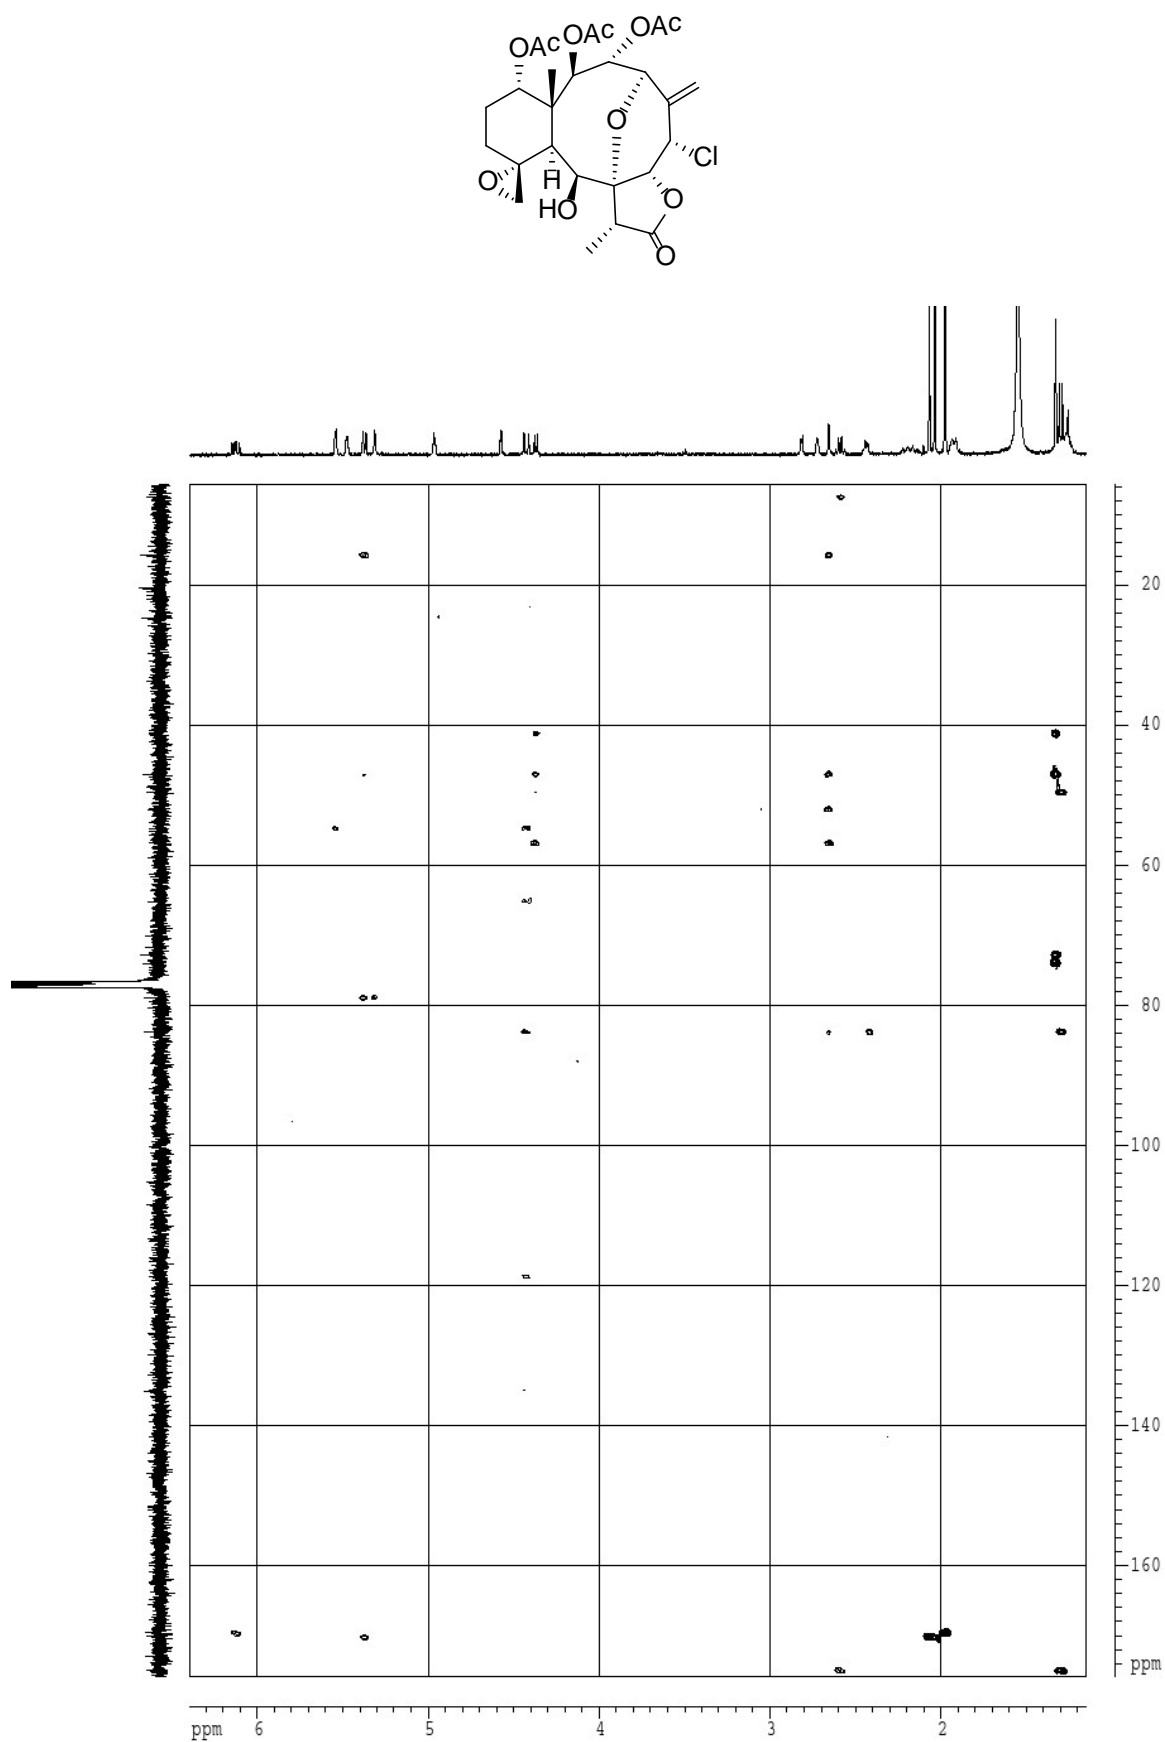



**Figure S47.** NOESY spectrum of the new compound **6**.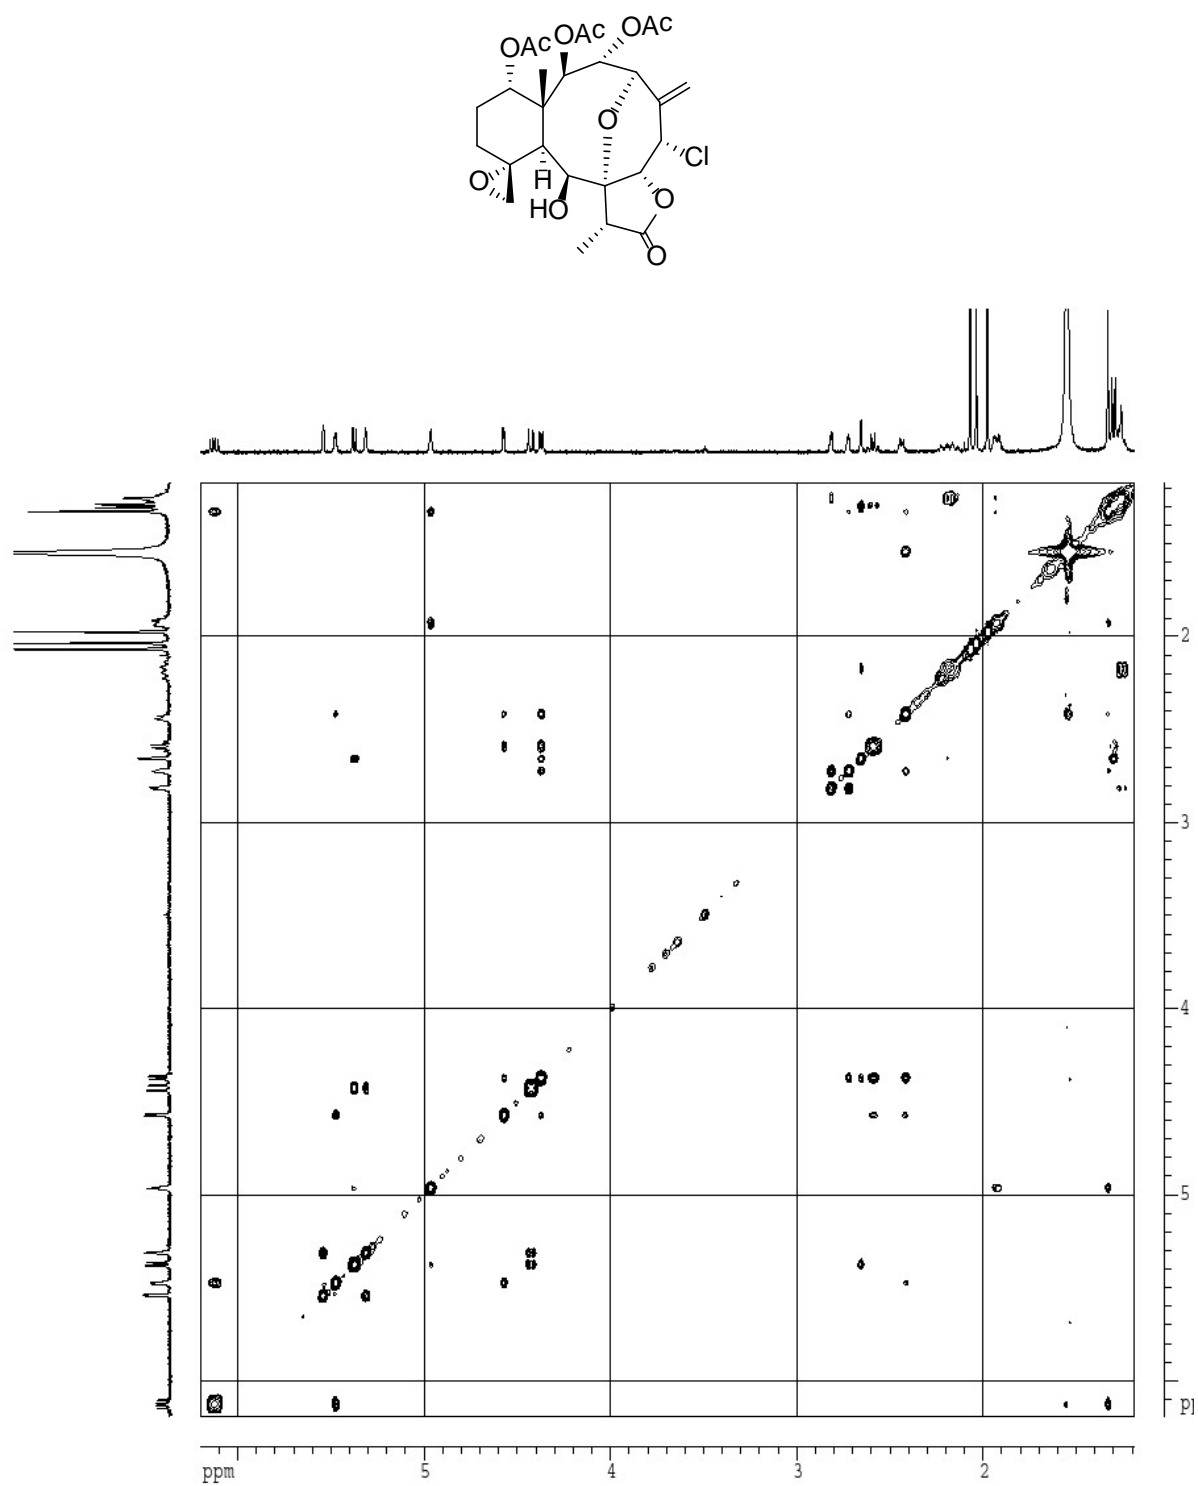

**Figure S48.** HR-ESIMS spectrum of the new compound **7**.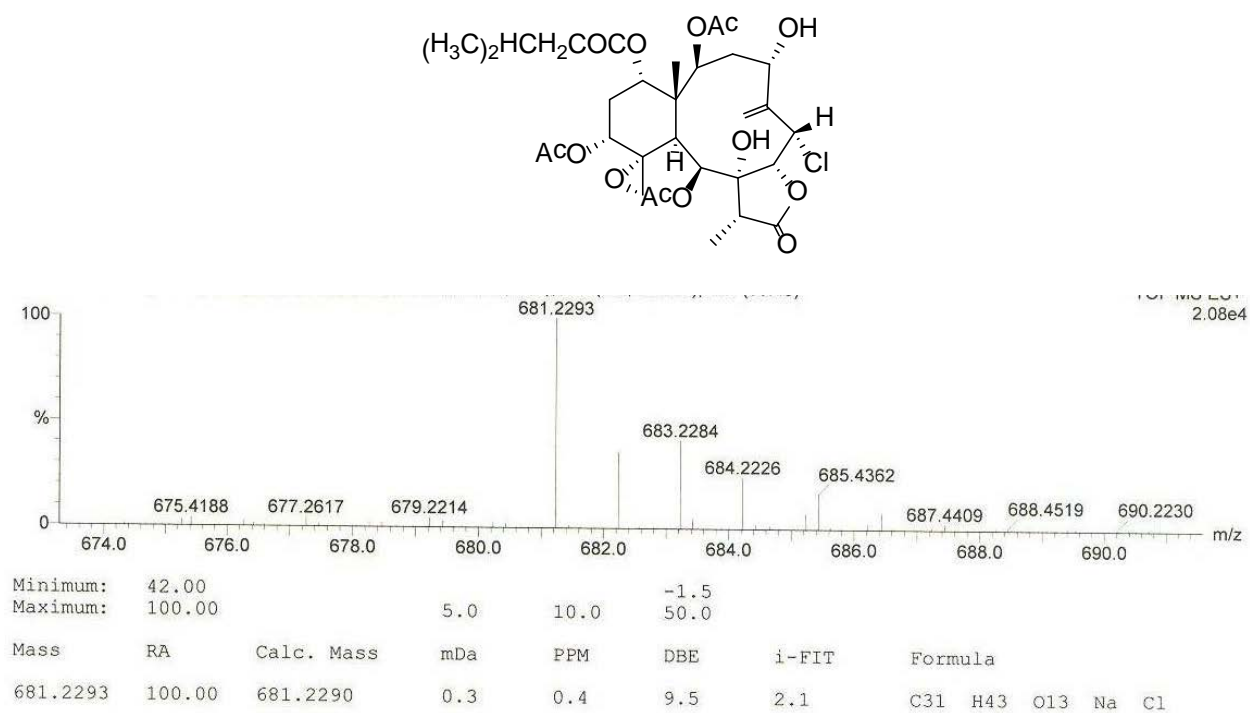

**Figure S49.**  $^1\text{H}$  NMR spectrum of the new compound 7.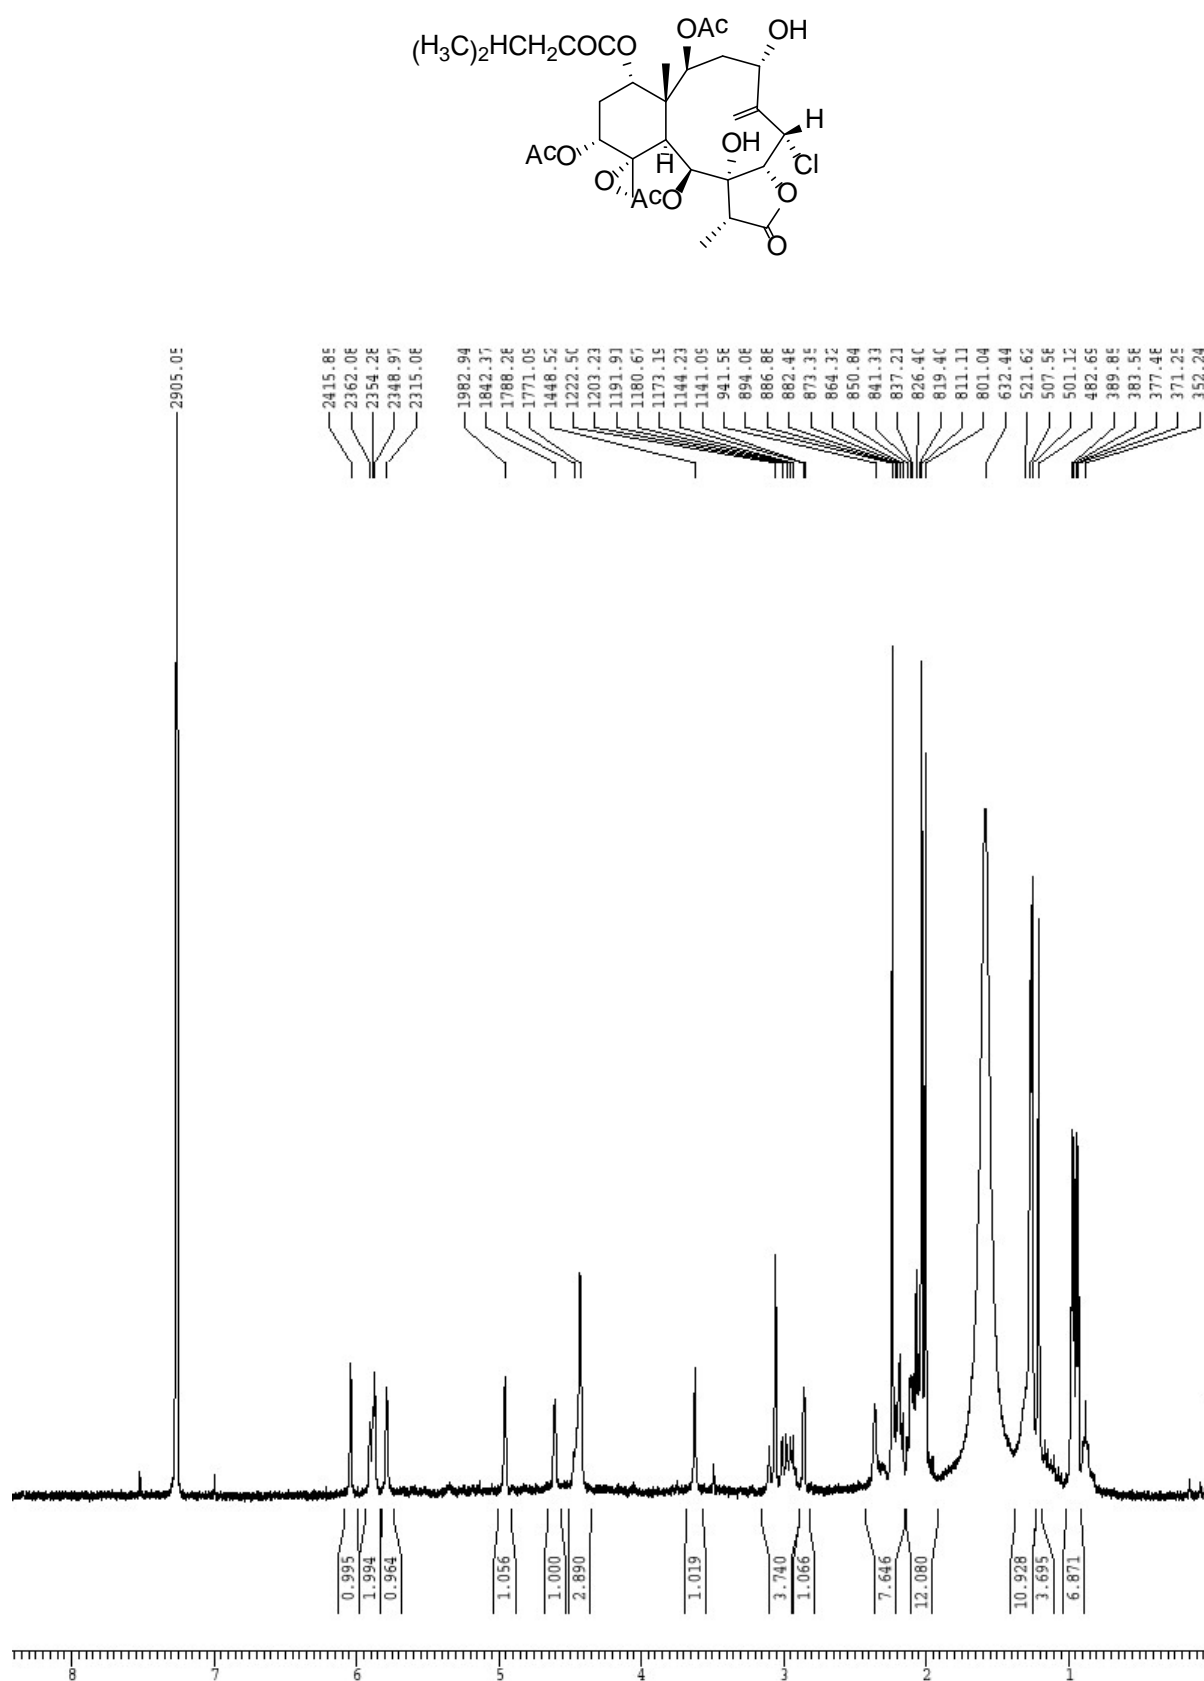

**Figure S50.**  $^{13}\text{C}$  NMR spectrum of the new compound 7.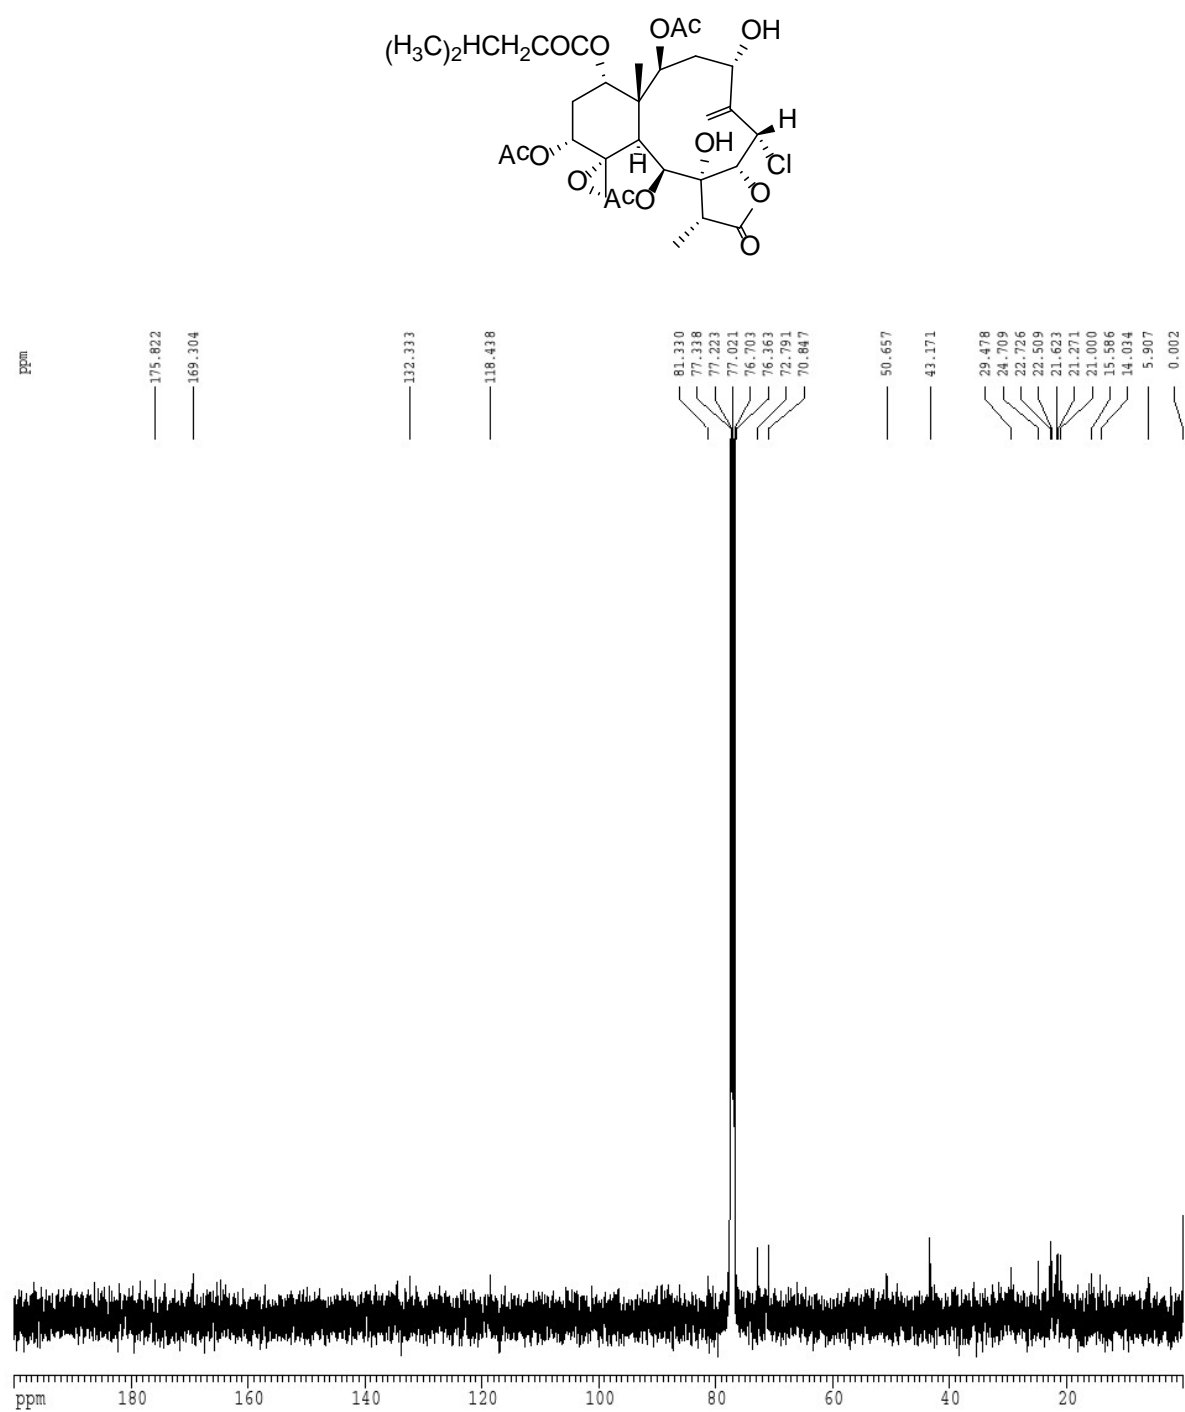

**Figure S51.** DEPT spectrum of the new compound 7.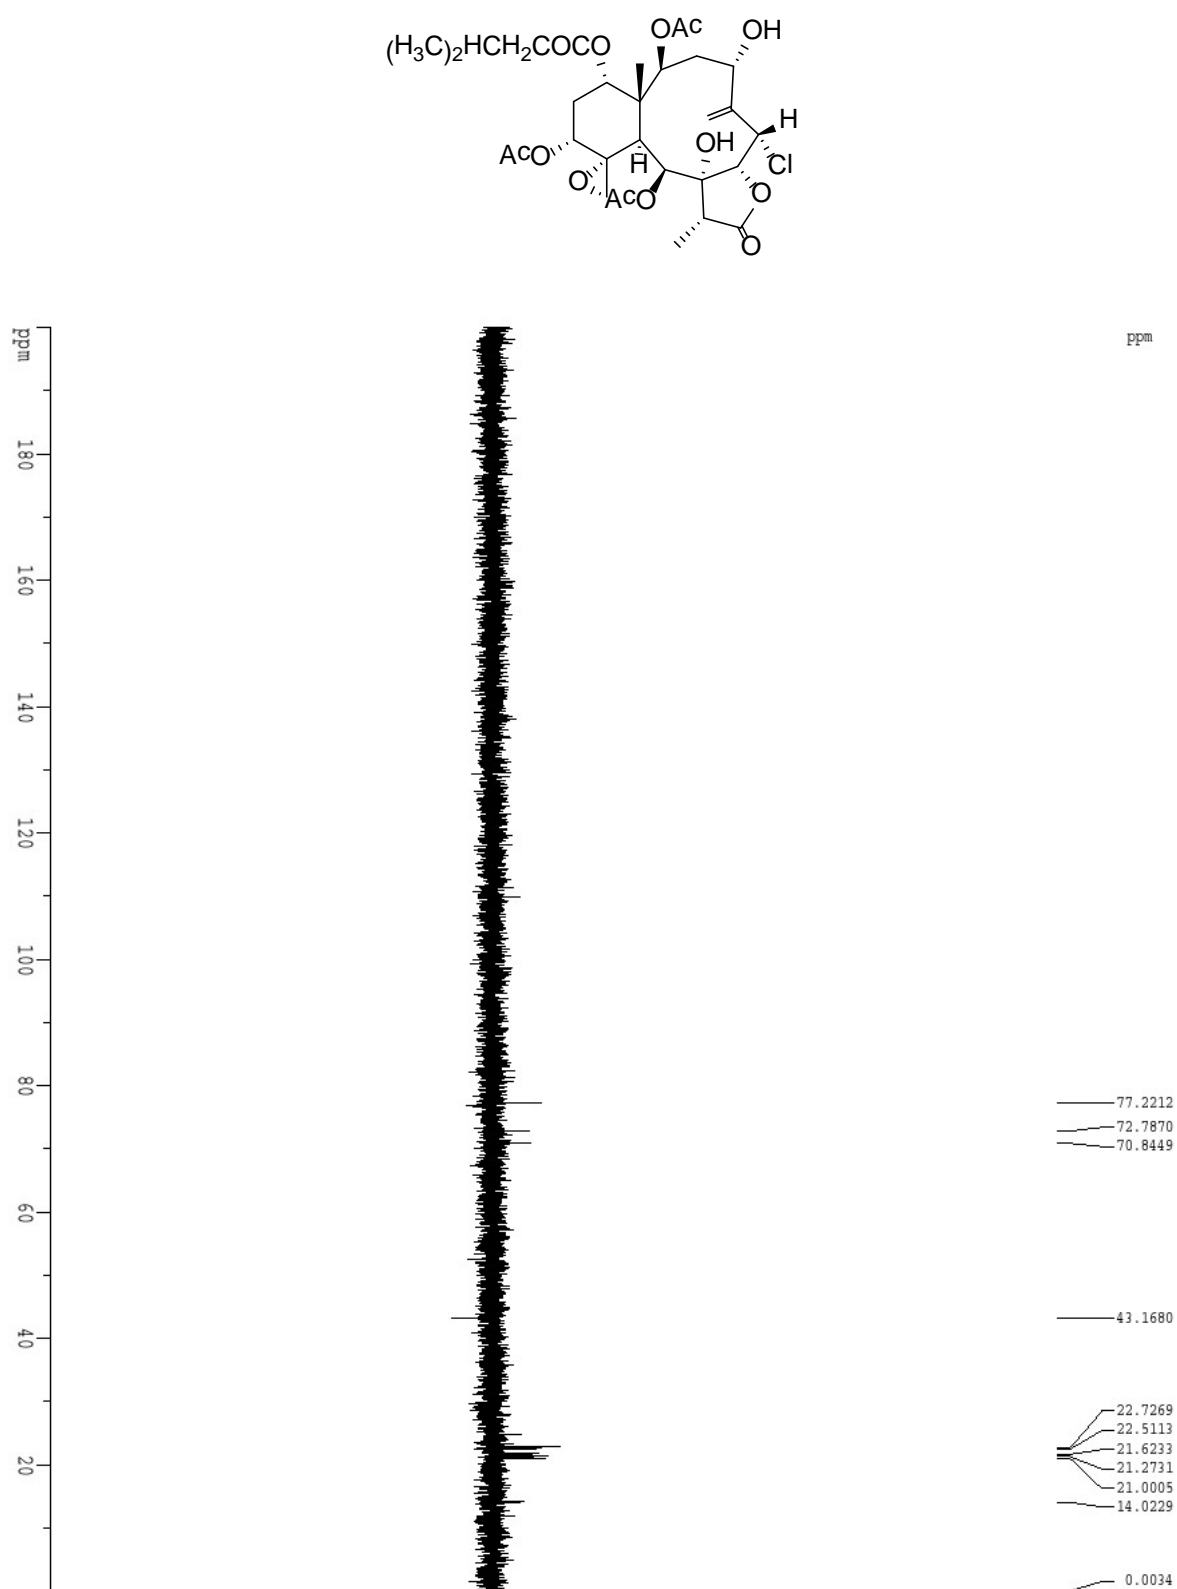

**Figure S52.** HSQC spectrum of the new compound **7**.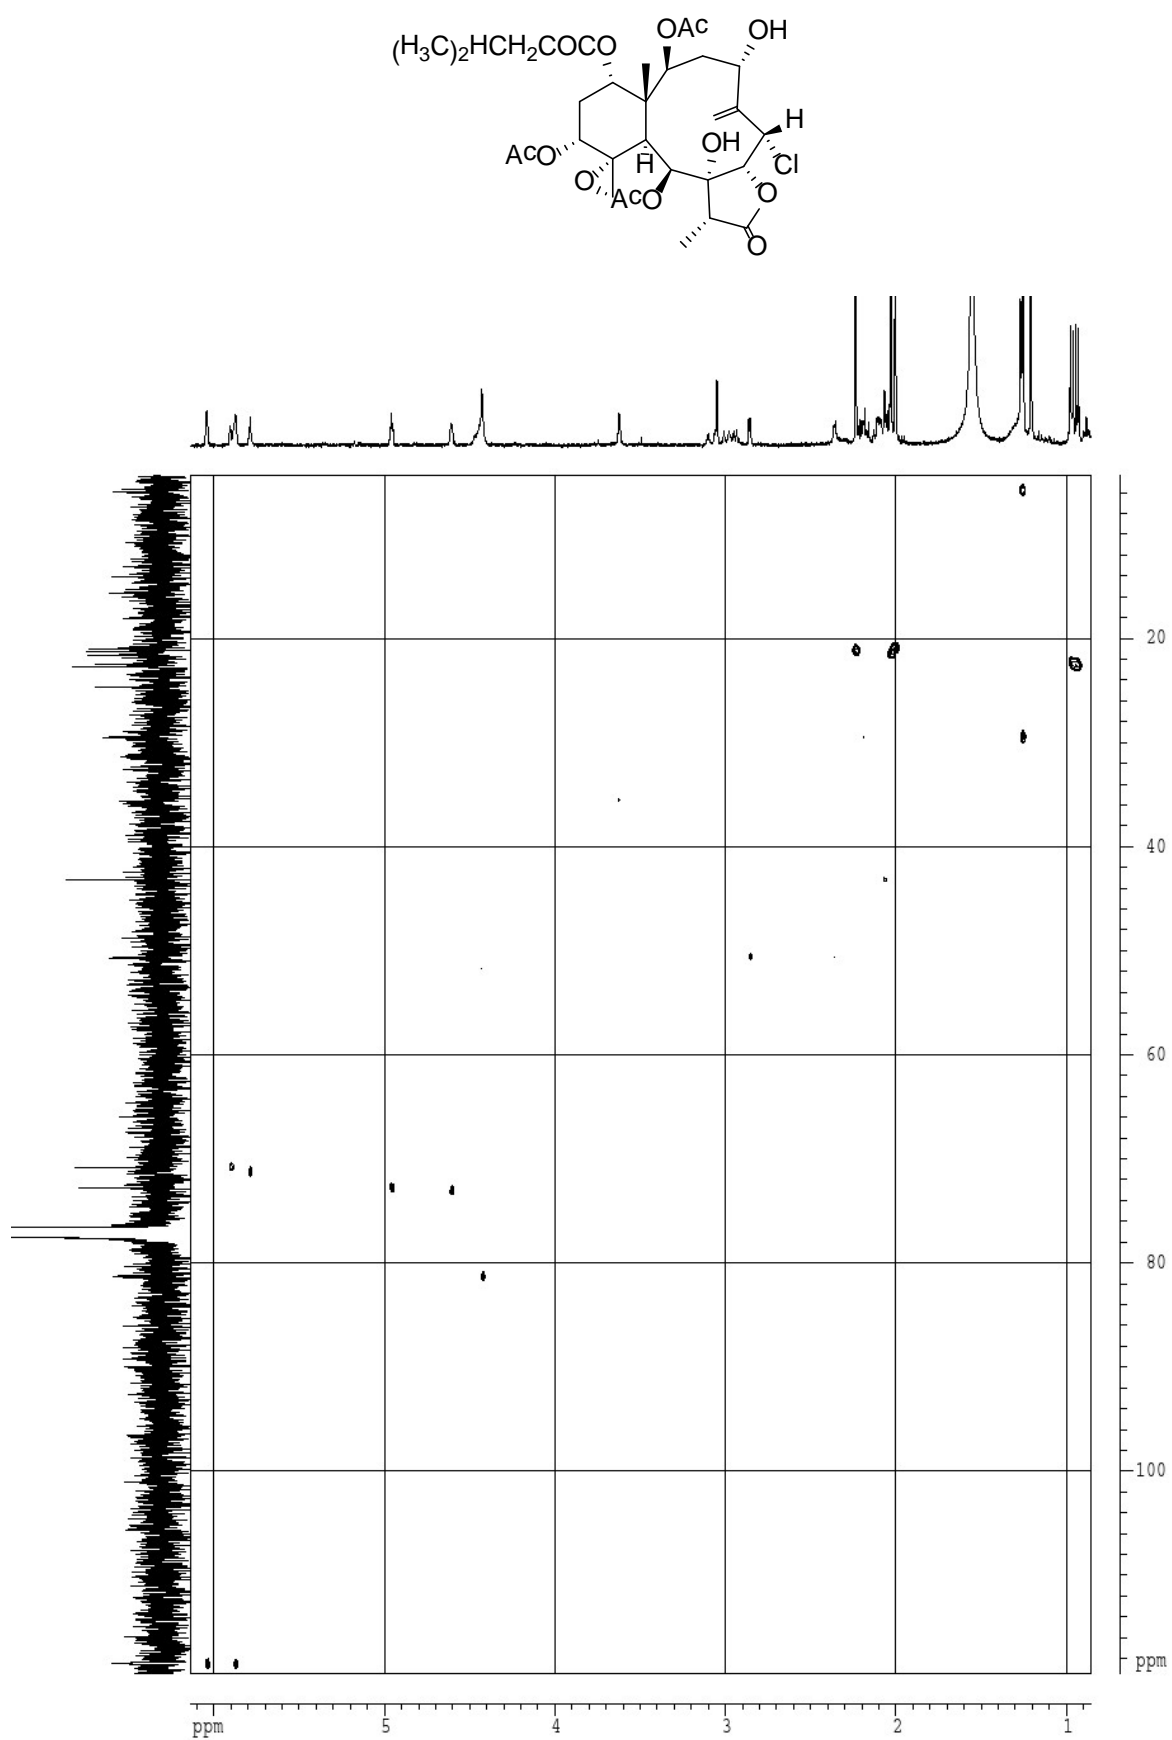

**Figure S53.**  $^1\text{H}$ - $^1\text{H}$  COSY spectrum of the new compound 7.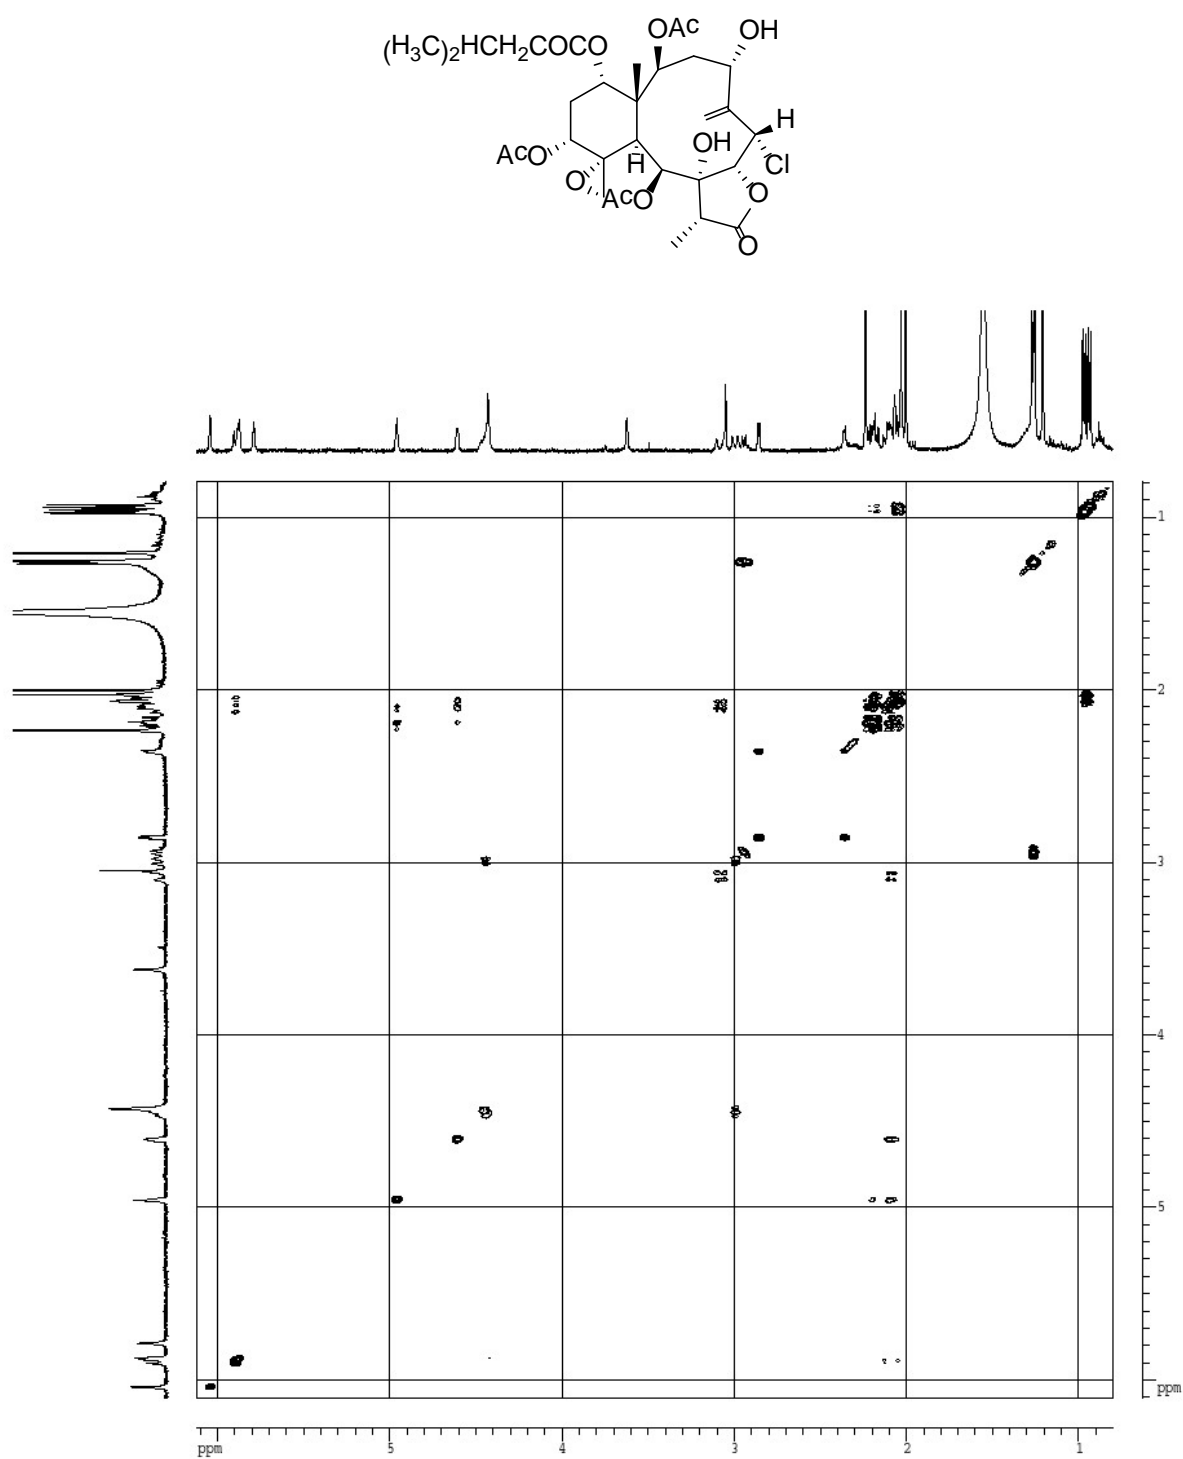

**Figure S54.** HMBC spectrum of the new compound 7.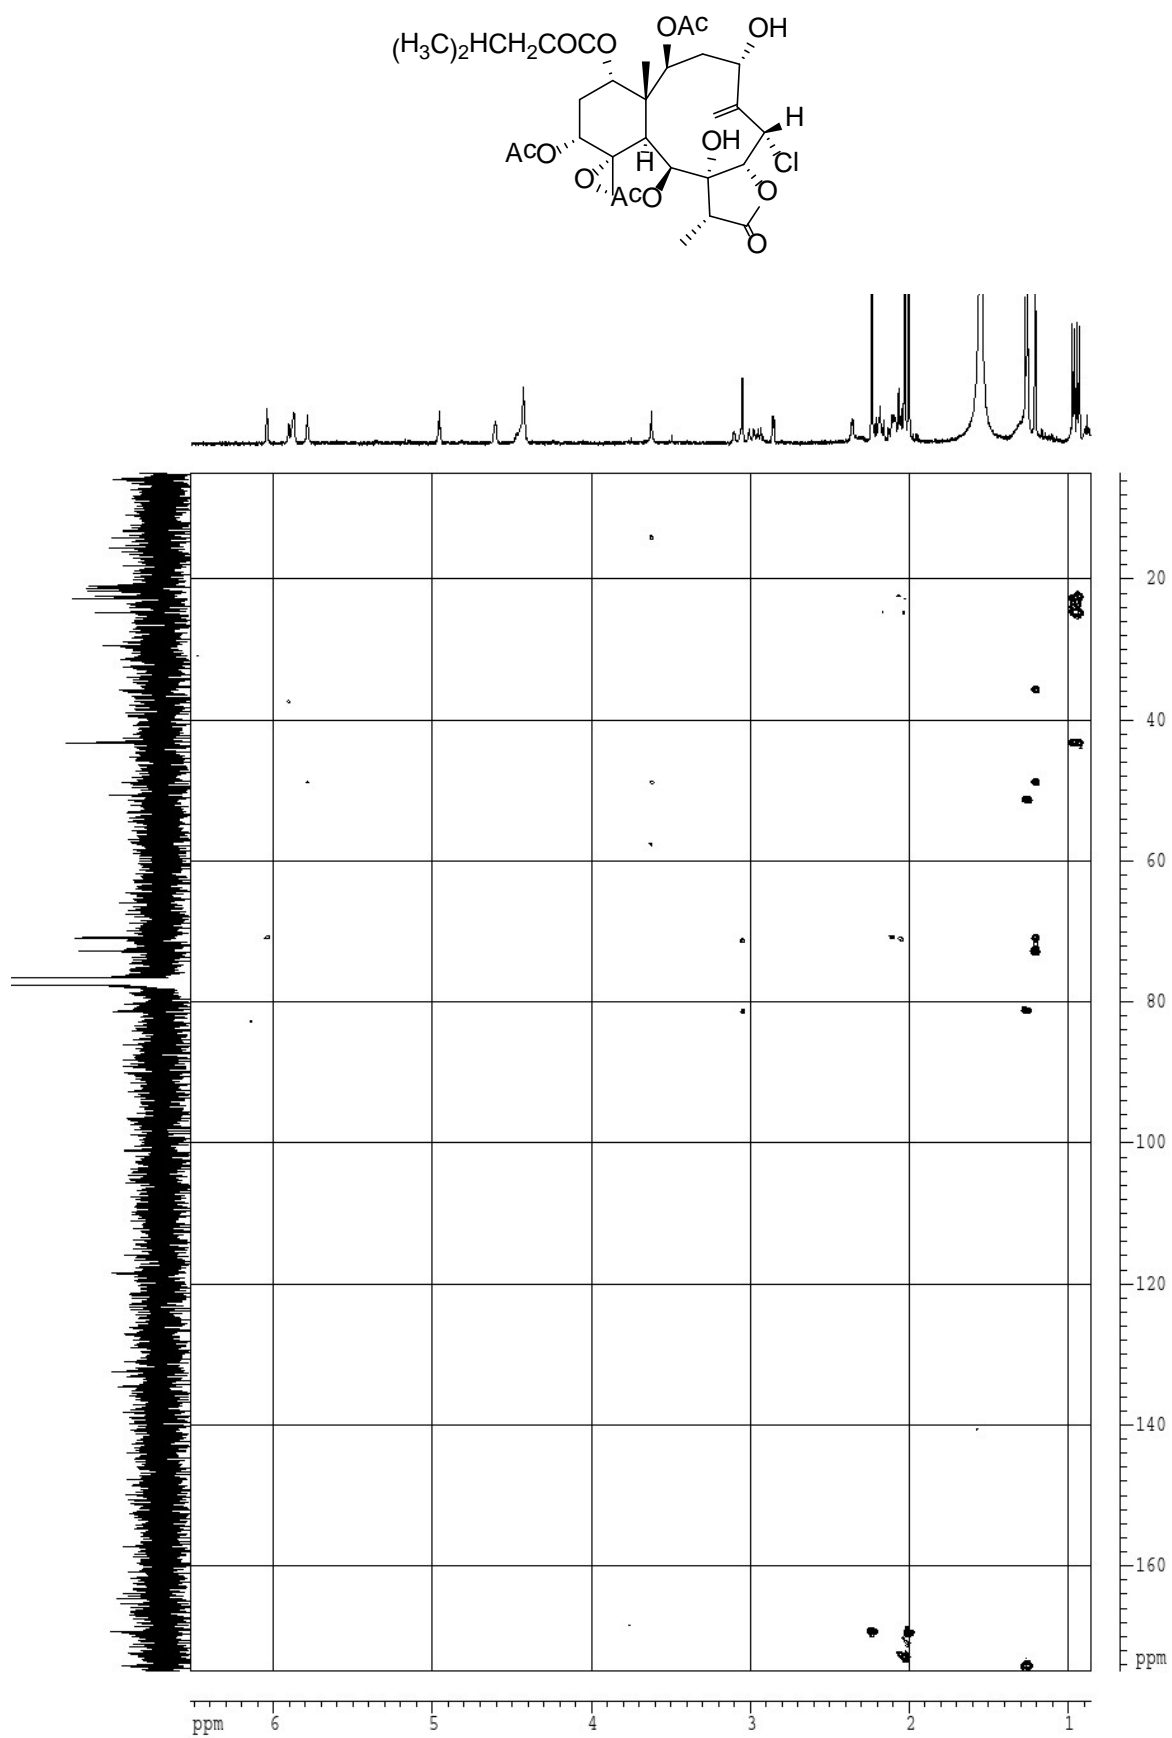



**Figure S55.** NOESY spectrum of the new compound 7.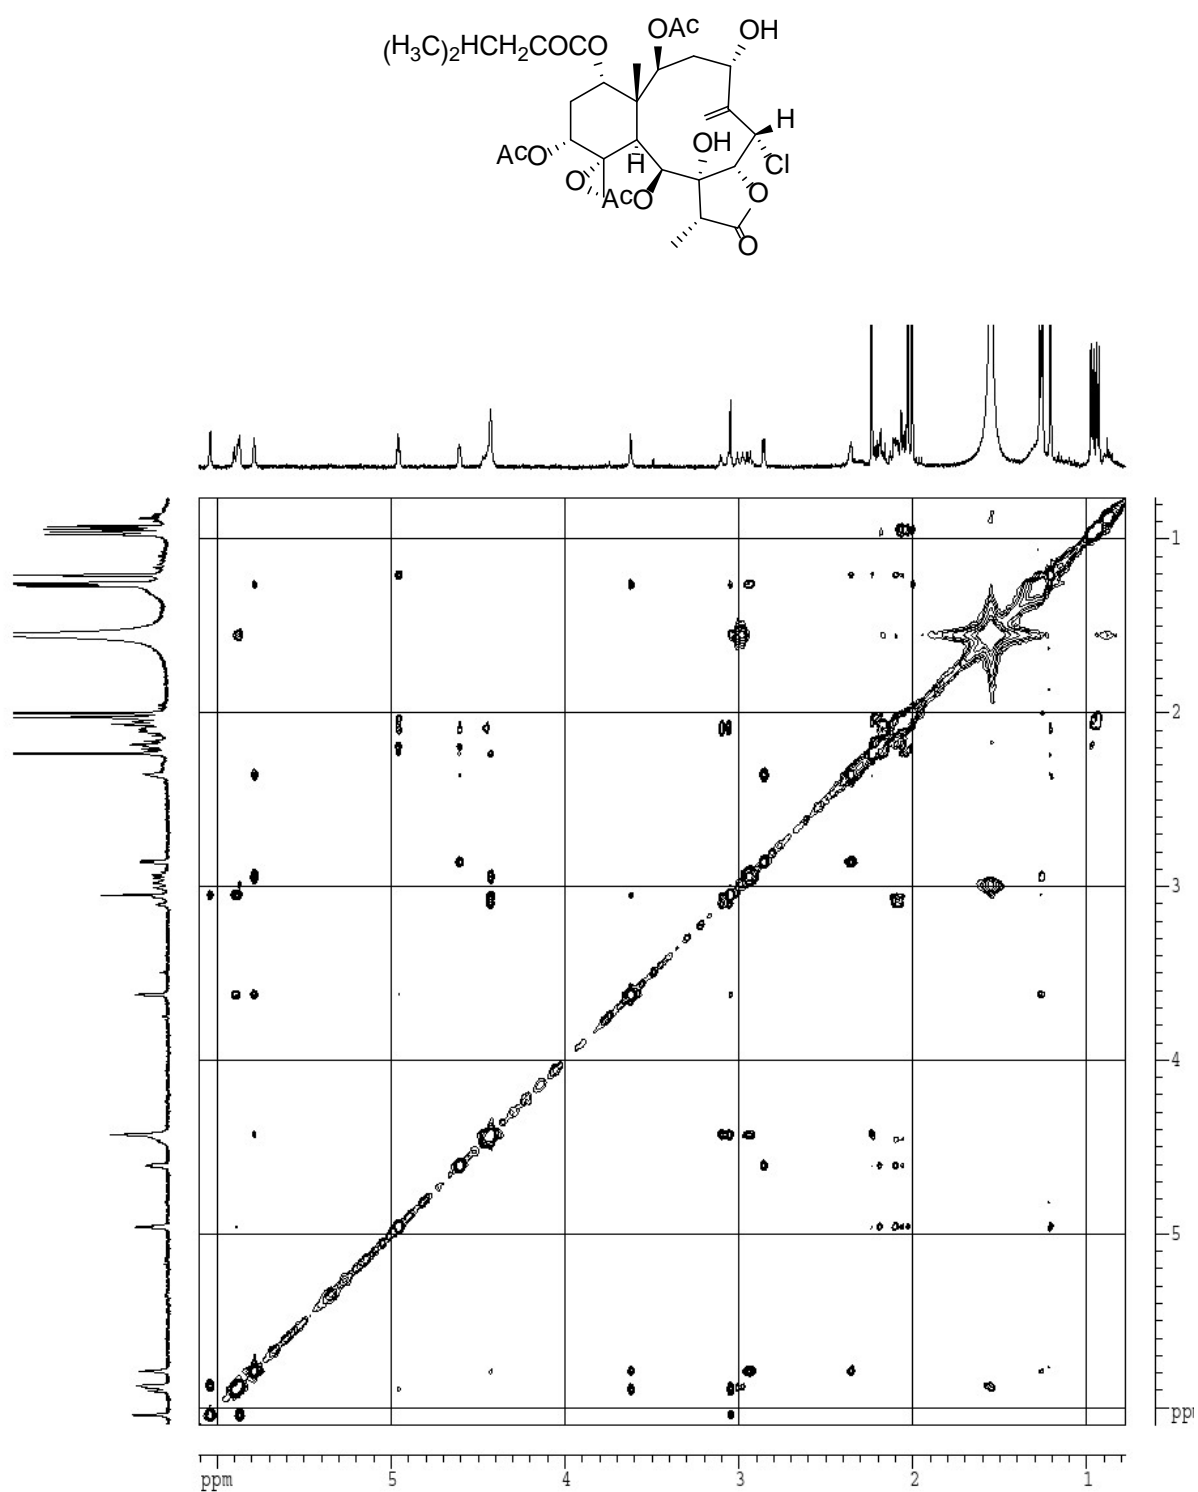

Supplement: s1 [file s1]
